# Supplementary material for: Palladium-catalyzed ring opening of norbornene: efficient synthesis of methylenecyclopentane derivatives
Source: Royal Society of Chemistry journal article supplement (doi:10.1039/c5cc02246k), 2015-01-01

## **Palladium-catalyzed ring opening of norbornene: efficient synthesis of methylenecyclopentane derivatives**

Xin-Xing Wu, Yi Shen, Wen-Long Chen, Si Chen, Xin-Hua Hao, Yu Xia, Peng-Fei Xu\* and Yong-Min Liang\*

State Key Laboratory of Applied Organic Chemistry, Lanzhou University, Lanzhou, 730000, P.R. China.

Email: liangym@lzu.edu.cn; xupf@lzu.edu.cn

### **Supporting Information**

#### **Table of contents**

|          |                                                                                                         |                |
|----------|---------------------------------------------------------------------------------------------------------|----------------|
| <b>1</b> | <b>General remarks</b>                                                                                  | <b>S2</b>      |
| <b>2</b> | <b>Optimization of the reaction conditions</b>                                                          | <b>S2</b>      |
| <b>3</b> | <b>Preparation of starting materials</b>                                                                | <b>S3</b>      |
| <b>4</b> | <b>General procedure for the preparation of the products 3 or 5</b>                                     | <b>S3-S14</b>  |
| <b>5</b> | <b>References</b>                                                                                       | <b>S14</b>     |
| <b>6</b> | <b>Crystallographic data of 3g and 3e'</b>                                                              | <b>S15-S16</b> |
| <b>7</b> | <b><sup>1</sup>H NMR, <sup>13</sup>C NMR spectra for products 3a-3s, 3a'-3s', 5a'-5d', 3gg and 3gg'</b> | <b>S17-S60</b> |
| <b>8</b> | <b>The NOE of 5d'</b>                                                                                   | <b>S61</b>     |

## 1. General remarks

For product purification by flash column chromatography, silica gel (200~300 mesh) and light petroleum ether (bp. 60~90) are used.  $^1\text{H}$  NMR spectra were recorded on a Bruker advance III 400 MHz in  $\text{CDCl}_3$  and  $^{13}\text{C}$  NMR spectra were recorded on 100 MHz in  $\text{CDCl}_3$  using TMS as internal standard. Mass spectra were determined on a Hewlett Packard 5988A spectrometer by direct inlet at 70 eV. High-resolution mass spectral analysis (HRMS) data were measured on a Bruker Apex II. Element analysis (EA) data were measured on a Vario EL. Melting points were determined on a microscopic apparatus and were uncorrected. Copies of their  $^1\text{H}$  NMR and  $^{13}\text{C}$  NMR spectra were provided. Dioxane and THF were dried over Na. The starting materials were purchased from Aldrich, Acros, Alfa or TCI and used without further purification.

## 2. Optimization of the reaction conditions<sup>a</sup>

| Entry                | Pd                                                    | Base                                       | Solvent    | Yield ( <b>3a</b> + <b>3a'</b> , % <sup>b</sup> ) |
|----------------------|-------------------------------------------------------|--------------------------------------------|------------|---------------------------------------------------|
| 1 <sup>c</sup>       | $\text{Pd}(\text{PPh}_3)_4$                           | $\text{Cs}_2\text{CO}_3$                   | MeCN       | trace                                             |
| 2 <sup>c</sup>       | $\text{Pd}(\text{PPh}_3)_4$                           | $\text{Cs}_2\text{CO}_3$                   | dioxane    | 18(1:1.5)                                         |
| 3 <sup>c</sup>       | $\text{Pd}(\text{PPh}_3)_4$                           | $\text{Cs}_2\text{CO}_3$                   | DMSO       | 0                                                 |
| 4 <sup>c</sup>       | $\text{Pd}(\text{PPh}_3)_4$                           | $\text{Cs}_2\text{CO}_3$                   | toluene    | 60 (1:2.0)                                        |
| 5 <sup>c</sup>       | $\text{Pd}(\text{PPh}_3)_4$                           | $\text{Cs}_2\text{CO}_3$                   | DMF        | trace                                             |
| <b>6<sup>d</sup></b> | <b><math>\text{Pd}(\text{PPh}_3)_4</math></b>         | <b><math>\text{Cs}_2\text{CO}_3</math></b> | <b>THF</b> | <b>87 (1:1.8)</b>                                 |
| 7 <sup>d</sup>       | $\text{Pd}(\text{PPh}_3)_4$                           | $\text{K}_2\text{CO}_3$                    | THF        | 0                                                 |
| 8 <sup>d</sup>       | $\text{Pd}(\text{PPh}_3)_4$                           | $\text{KO}^t\text{Bu}$                     | THF        | 20(1:1.1)                                         |
| 9 <sup>d</sup>       | $\text{Pd}(\text{PPh}_3)_4$                           | $\text{LiO}^t\text{Bu}$                    | THF        | 0                                                 |
| 10 <sup>d</sup>      | $\text{Pd}(\text{PPh}_3)_4$                           | $\text{Na}_2\text{CO}_3$                   | THF        | 0                                                 |
| 11 <sup>d</sup>      | $\text{Pd}(\text{OAc})_2/\text{PPh}_3$                | $\text{Cs}_2\text{CO}_3$                   | THF        | 68(1:1.7)                                         |
| 12 <sup>d</sup>      | $\text{Pd}_2(\text{dba})_3$                           | $\text{Cs}_2\text{CO}_3$                   | THF        | trace                                             |
| 13 <sup>d</sup>      | $\text{Pd}_2(\text{dba})_3$ $\text{CHCl}_3$           | $\text{Cs}_2\text{CO}_3$                   | THF        | trace                                             |
| 14 <sup>d</sup>      | $\text{Pd}(\text{TFA})_2/\text{PPh}_3$                | $\text{Cs}_2\text{CO}_3$                   | THF        | 64(1:1.7)                                         |
| 15 <sup>d</sup>      | $\text{PdCl}_2(\text{PPh}_3)_2/\text{PPh}_3$          | $\text{Cs}_2\text{CO}_3$                   | THF        | 65(1:1.8)                                         |
| 16 <sup>d</sup>      | $\text{PdCl}_2(\text{MeCN})_2/\text{PPh}_3$           | $\text{Cs}_2\text{CO}_3$                   | THF        | 68(1:1.7)                                         |
| 17 <sup>d</sup>      | $\text{Pd}(\text{OAc})_2/\text{xantphos}$             | $\text{Cs}_2\text{CO}_3$                   | THF        | 17(1:8.0)                                         |
| 18 <sup>d</sup>      | $\text{Pd}(\text{OAc})_2/\text{xphos}$                | $\text{Cs}_2\text{CO}_3$                   | THF        | 44(4.0:1.0)                                       |
| 19 <sup>d</sup>      | $\text{Pd}(\text{OAc})_2/\text{PCy}_3$                | $\text{Cs}_2\text{CO}_3$                   | THF        | <10                                               |
| 20 <sup>d</sup>      | $\text{Pd}(\text{OAc})_2/[\text{HPtBu}_3]\text{BF}_4$ | $\text{Cs}_2\text{CO}_3$                   | THF        | trace                                             |
| 21 <sup>d,e</sup>    | $\text{Pd}(\text{PPh}_3)_4$                           | $\text{Cs}_2\text{CO}_3$                   | THF        | 69(1:1.8)                                         |
| 22 <sup>d</sup>      | none                                                  | $\text{Cs}_2\text{CO}_3$                   | THF        | 0                                                 |

<sup>a</sup> Reaction conditions : **1a** (0.2 mmol), **2a** (0.3 mmol), norbornene (3.0 equiv.), Pd (5 mol%), ligand (10 mol%), base (2.5 equiv.), solvent (2 ml), 10 h. <sup>b</sup> Isolated yields. <sup>c</sup> The reaction was carried out at 90 °C. <sup>d</sup> The reaction was carried out at 60 °C. <sup>e</sup> The reaction was carried out with 2.5 mol% of  $\text{Pd}(\text{PPh}_3)_4$ .

### 3. Preparation of starting materials

*N*-tosylhydrazones **2** and **4** were prepared according to a previously reported literature<sup>1</sup>. Aryl iodides **1** are commercially available.

### 4. General procedure for the preparation of the products **3** or **5**

**1** (0.2 mmol), **2** or **4** (0.3 mmol), Pd(PPh<sub>3</sub>)<sub>4</sub> (5 mol%), Cs<sub>2</sub>CO<sub>3</sub> (2.5 equiv.), norbornene (3.0 equiv.) were dissolved in 2 mL of degassed dry THF. The mixture was flushed with N<sub>2</sub> and heated at the indicated temperature for the indicated time. After cooling at room temperature, the mixture was diluted with diethyl ether, washed with water, dried over magnesium sulfate and purified by flash chromatography (silica, petroleum ether/AcOEt).

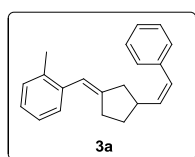

**1-methyl-2-((E)-(3-((Z)-styryl)cyclopentylidene)methyl)benzene (3a)**: oil; <sup>1</sup>H NMR (CDCl<sub>3</sub>, 400MHz) δ: 7.36-7.22 (m, 6H), 7.14-7.07 (m, 3H), 6.45-6.40 (m, 2H), 5.62 (dd, *J* = 10.0 Hz, *J* = 11.2 Hz, 1H), 3.15-3.11 (m, 1H), 2.77-2.71 (m, 1H), 2.61-2.57 (m, 1H), 2.47-2.38 (m, 2H), 2.28 (s, 3H), 2.04-2.01 (m, 1H), 1.60-1.53 (m, 1H). <sup>13</sup>C NMR (100 MHz, CDCl<sub>3</sub>) δ: 145.5, 137.7, 137.5, 136.7, 135.8, 129.8, 128.6, 128.4, 128.2, 127.9, 126.6, 126.1, 125.4, 119.3, 42.7, 38.0, 34.3, 30.3, 20.0. MS(EI): *m/z*(%): 274(100.0), 183(14.8), 170(68.1), 155(28.7), 129(68.8), 115 (25.4), 91(36.5).

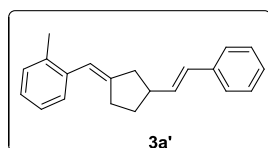

**1-methyl-2-((E)-(3-((E)-styryl)cyclopentylidene)methyl)benzene (3a')**: oil; <sup>1</sup>H NMR (CDCl<sub>3</sub>, 400MHz) δ: 7.36-7.27 (m, 5H), 7.20-7.14 (m, 3H), 7.11-7.07 (m, 1H), 6.45-6.41 (m, 2H), 6.23 (dd, *J* = 6.8 Hz, *J* = 16.0 Hz, 1H), 2.79-2.71 (m, 2H), 2.63-2.57 (m, 1H), 2.49-2.40 (m, 2H), 2.29 (s, 3H), 2.01-1.99 (m, 1H), 1.64-1.54 (m, 1H). <sup>13</sup>C NMR (100 MHz, CDCl<sub>3</sub>) δ: 145.4, 137.6, 137.5, 135.7, 134.0, 129.8, 128.7, 128.5, 127.9, 126.9, 126.1, 126.0, 125.4, 119.4, 42.7, 41.8, 33.5, 30.2, 20.0. Anal. Calcd. for C<sub>21</sub>H<sub>22</sub>: C, 91.92; H, 8.08. Found: C, 91.83; H, 8.28.

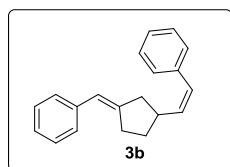

**(Z)-2-((E)-3-benzylidencyclopentyl)vinyl)benzene (3b)**: oil; <sup>1</sup>H NMR (CDCl<sub>3</sub>, 400MHz) δ: 7.36-7.23 (m, 9H), 7.18-7.14 (m, 1H), 6.44 (d, *J* = 11.2 Hz, 1H), 6.36 (s, 1H), 5.61 (dd, *J* = 10.0 Hz, *J* = 11.2 Hz, 1H), 3.14-3.10 (m, 1H), 2.78-2.70 (m, 2H), 2.57-2.53 (m, 1H), 2.43-2.37 (m, 1H), 2.09-2.06 (m, 1H), 1.66-1.59 (m, 1H). <sup>13</sup>C NMR (100 MHz, CDCl<sub>3</sub>) δ: 145.7, 138.5, 137.7, 136.5, 128.7, 128.7, 128.6, 128.5, 128.4, 128.2, 128.0, 126.6, 125.8, 121.4, 43.6, 38.0, 34.6, 30.8. MS(EI): *m/z*(%): 260(83.6), 169(40.1), 156(100.0), 141(38.6), 129(57.3), 115 (47.3), 91(61.4).

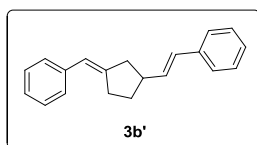

**(E)-2-((E)-3-benzylidenecyclopentyl)vinylbenzene (3b')** : solid; m.p.90-92 °C; <sup>1</sup>H NMR (CDCl<sub>3</sub>, 400MHz) δ: oil; <sup>1</sup>H NMR (CDCl<sub>3</sub>, 400MHz) δ: 7.37-7.29 (m, 6H), 7.24-7.15 (m, 4H), 6.44 (d, *J* = 15.6 Hz, 1H), 6.38 (s, 1H), 6.23 (dd, *J* = 7.2 Hz, *J* = 16.0 Hz, 1H), 2.79-2.70 (m, 3H), 2.60-2.57 (m, 1H), 2.49-2.43 (m, 1H), 2.10-2.07 (m, 1H), 1.70-1.65 (m, 1H). <sup>13</sup>C NMR (100 MHz, CDCl<sub>3</sub>) δ: 145.7, 138.6, 137.6, 133.8, 128.9, 128.5, 128.2, 128.0, 127.0, 126.0, 125.8, 121.4, 42.8, 42.6, 33.8, 30.7. Anal. Calcd. for C<sub>20</sub>H<sub>20</sub> : C, 92.26; H, 7.74. Found: C, 92.05; H, 7.89.

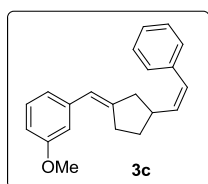

**1-methoxy-3-((E)-3-((Z)-styryl)cyclopentylidene)methylbenzene (3c)**: oil; <sup>1</sup>H NMR (CDCl<sub>3</sub>, 400MHz) δ: 7.35-7.27 (m, 4H), 7.25-7.21 (m, 2H), 6.89 (d, *J* = 7.6 Hz, 1H), 6.85 (s, 1H), 6.73 (dd, *J* = 2.4 Hz, *J* = 8.0 Hz, 1H), 6.44 (d, *J* = 11.6 Hz, 1H), 6.33 (s, 1H), 5.60 (dd, *J* = 10.0 Hz, *J* = 11.2 Hz, 1H), 3.80 (s, 3H), 3.15-3.09 (m, 1H), 2.79-2.69 (m, 2H), 2.60-2.53 (m, 1H), 2.43-2.36 (m, 1H), 2.11-2.04 (m, 1H), 1.68-1.61 (m, 1H). <sup>13</sup>C NMR (100 MHz, CDCl<sub>3</sub>) δ: 159.5, 146.1, 139.9, 137.7, 136.4, 129.1, 128.7, 128.6, 128.2, 126.6, 121.3, 120.7, 113.5, 111.3, 55.1, 43.6, 38.0, 34.6, 30.9. MS(EI): *m/z*(%): 290(100.0), 199(26.7), 186(71.8), 169(20.3), 159(39.7), 145 (22.7), 129(36.0), 91 (35.2). HRMS-ESI (*m/z*) [M + H]<sup>+</sup> calcd for C<sub>21</sub>H<sub>23</sub>O<sub>1</sub>: 291.1743; Found, 291.1741.

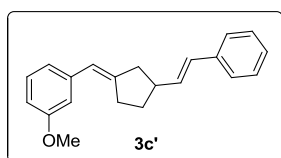

**1-methoxy-3-((E)-3-((E)-styryl)cyclopentylidene)methylbenzene (3c')**: solid; m.p. 62-64 °C; <sup>1</sup>H NMR (CDCl<sub>3</sub>, 400MHz) δ: oil; <sup>1</sup>H NMR (CDCl<sub>3</sub>, 400MHz) δ: 7.36-7.18 (m, 6H), 6.91 (d, *J* = 7.6 Hz, 1H), 6.87 (s, 1H), 6.74 (dd, *J* = 2.0 Hz, *J* = 8.0 Hz, 1H), 6.46-6.42 (m, 1H), 6.35 (s, 1H), 6.23 (dd, *J* = 7.2 Hz, *J* = 16.0 Hz, 1H), 3.81 (s, 3H), 2.80-2.70 (m, 3H), 2.64-2.57 (m, 1H), 2.48-2.44 (m, 1H), 2.12-2.06 (m, 1H), 1.72-1.64 (m, 1H). <sup>13</sup>C NMR (100 MHz, CDCl<sub>3</sub>) δ: 159.5, 146.1, 140.0, 137.6, 133.8, 129.1, 128.9, 128.5, 127.0, 126.0, 121.3, 120.7, 113.5, 111.3, 55.1, 42.8, 42.6, 33.8, 30.8. HRMS-ESI (*m/z*) [M + H]<sup>+</sup> calcd for C<sub>21</sub>H<sub>23</sub>O<sub>1</sub>: 291.1743; Found, 291.1741.

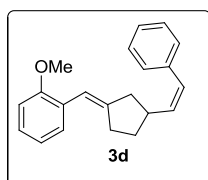

**1-methoxy-2-((E)-3-((Z)-styryl)cyclopentylidene)methylbenzene (3d)** : oil; <sup>1</sup>H NMR (CDCl<sub>3</sub>, 400MHz) δ: oil; <sup>1</sup>H NMR (CDCl<sub>3</sub>, 400MHz) δ: 7.35-7.15 (m, 7H), 6.94-6.90 (m, 1H), 6.85 (d, *J* = 8.4 Hz, 1H), 6.59 (s, 1H), 6.43 (d, *J* = 11.6 Hz, 1H), 5.61 (dd, *J* = 10.0 Hz, *J* = 11.2 Hz, 1H), 3.83 (s, 1H), 3.15-3.11 (m, 1H), 2.79-2.66 (m, 2H), 2.52-2.39 (m, 2H), 2.05-2.02 (m, 1H), 1.62-1.57 (m, 1H). <sup>13</sup>C NMR (100 MHz, CDCl<sub>3</sub>) δ: 156.4, 145.6, 137.7,

136.8, 128.6, 128.6, 128.5, 128.2, 127.4, 127.2, 126.6, 120.1, 115.4, 110.3, 55.4, 43.1, 38.0, 34.5, 30.7. MS(EI):  $m/z$ (%): 290(100.0), 199(23.8), 186(71.8), 169(50.9), 159(39.7), 145 (22.7), 129(34.5), 91 (56.7), 44(42.8). HRMS-ESI ( $m/z$ ) [ $M + H$ ]<sup>+</sup> calcd for C<sub>21</sub>H<sub>23</sub>O<sub>1</sub>: 291.1743; Found, 291.1741.

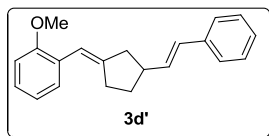

**1-methoxy-2-((E)-(3-((E)-styryl)cyclopentylidene)methyl)benzene (3d')** : solid; m.p. 90-92 °C; <sup>1</sup>H NMR (CDCl<sub>3</sub>, 400MHz) δ: oil; <sup>1</sup>H NMR (CDCl<sub>3</sub>, 400MHz) δ: 7.36-7.27 (m, 5H), 7.21-7.15 (m, 2H), 6.93 (t,  $J = 7.2$  Hz, 1H), 6.86 (d,  $J = 8.4$  Hz, 1H), 6.61 (s, 1H), 6.44 (d,  $J = 16.0$  Hz, 1H), 6.24 (dd,  $J = 6.8$  Hz,  $J = 16.0$  Hz, 1H), 3.83 (s, 3H), 2.80-2.66 (m, 3H), 2.57-2.43 (m, 2H), 2.06-2.01 (m, 1H), 1.68-1.60 (m, 1H). <sup>13</sup>C NMR (100 MHz, CDCl<sub>3</sub>) δ: 156.4, 145.6, 137.7, 134.2, 128.7, 128.6, 128.5, 127.5, 127.1, 126.9, 126.0, 120.1, 115.5, 110.3, 55.4, 42.8, 42.2, 33.7, 30.6. HRMS-ESI ( $m/z$ ) [ $M + H$ ]<sup>+</sup> calcd for C<sub>21</sub>H<sub>23</sub>O<sub>1</sub>: 291.1743; Found, 291.1741.

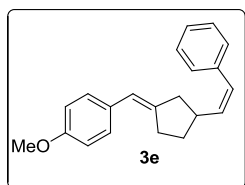

**1-methoxy-4-((E)-(3-((Z)-styryl)cyclopentylidene)methyl)benzene (3e)** : oil; <sup>1</sup>H NMR (CDCl<sub>3</sub>, 400MHz) δ: 7.35-7.27 (m, 4H), 7.24-7.21 (m, 3H), 6.86 (dd,  $J = 2.0$  Hz,  $J = 6.8$  Hz, 2H), 6.43 (d,  $J = 11.6$  Hz, 1H), 6.30 (s, 1H), 5.60 (dd,  $J = 10.0$  Hz,  $J = 11.6$  Hz, 1H), 3.80 (s, 3H), 3.14-3.09 (m, 1H), 2.75-2.67(m, 2H), 2.54-2.49(m, 1H), 2.41-2.35(m, 1H), 2.08-2.04(m, 1H), 1.68-1.60(m, 1H). <sup>13</sup>C NMR (100 MHz, CDCl<sub>3</sub>) δ: 157.6, 143.3, 137.7, 136.6, 131.4, 129.0, 128.6, 128.2, 126.6, 120.7, 113.6, 55.2, 43.5, 38.0, 34.6, 30.6. MS(EI):  $m/z$ (%): 290(100.0), 199(12.3), 186(38.0), 159(27.8), 129(24.4), 121 (42.0). HRMS-ESI ( $m/z$ ) [ $M + H$ ]<sup>+</sup> calcd for C<sub>21</sub>H<sub>23</sub>O<sub>1</sub>: 291.1743; Found, 291.1741.

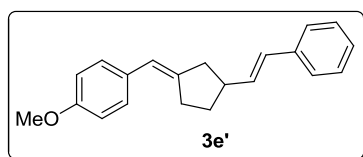

**1-methoxy-4-((E)-(3-((E)-styryl)cyclopentylidene)methyl)benzene (3e')** : solid; m.p.110-112 °C; <sup>1</sup>H NMR (CDCl<sub>3</sub>, 400MHz) δ: 7.35 (d,  $J = 7.2$  Hz, 2H), 7.31-7.23 (m, 4H), 7.19 (t,  $J = 7.2$  Hz, 1H), 6.87 (d,  $J = 8.4$  Hz, 2H), 6.44 (d,  $J = 16.0$  Hz, 1H), 6.32 (s, 1H), 6.23 (dd,  $J = 7.2$  Hz,  $J = 16.0$  Hz, 1H), 3.80 (s, 3H), 2.74-2.69(m, 3H), 2.59-2.51(m, 1H), 2.45-2.39(m, 1H), 2.08-2.04(m, 1H), 1.71-1.61(m, 1H). <sup>13</sup>C NMR (100 MHz, CDCl<sub>3</sub>) δ: 157.6, 143.3, 137.6, 133.9, 131.4, 129.1, 128.8, 128.5, 126.9, 126.0, 120.7, 113.7, 55.2, 42.7, 42.7, 33.9, 30.6. HRMS-ESI ( $m/z$ ) [ $M + H$ ]<sup>+</sup> calcd for C<sub>21</sub>H<sub>23</sub>O<sub>1</sub>: 291.1743; Found, 291.1741.

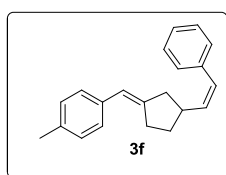

**1-methyl-4-((E)-(3-((Z)-styryl)cyclopentylidene)methyl)benzene (3f)** : solid; m.p.76-78 °C; <sup>1</sup>H NMR (CDCl<sub>3</sub>, 400MHz) δ: 7.35-7.27 (m, 4H), 7.24-7.18 (m, 3H), 7.12 (d, *J* = 8.0 Hz, 2H), 6.43 (d, *J* = 12.0 Hz, 1H), 6.32 (s, 1H), 5.60 (t, *J* = 10.4 Hz, 1H), 3.17-3.07(m, 1H), 2.76-2.68(m, 2H), 2.57-2.49(m, 1H), 2.41-2.35(m, 1H), 2.32(s, 3H), 2.10-2.04(m, 1H), 1.68-1.58(m, 1H). <sup>13</sup>C NMR (100 MHz, CDCl<sub>3</sub>) δ: 144.6, 137.7, 136.6, 135.7, 135.4, 128.9, 128.6, 128.6, 128.2, 127.9, 126.6, 121.2, 43.5, 38.0, 34.6, 30.7, 21.1. MS(EI): *m/z*(%): 274(100.0), 170(70.8), 155(33.9), 144(16.0), 129(74.2), 105 (36.1), 91 (31.0).

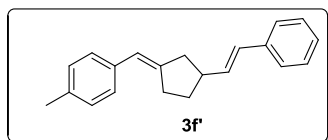

**1-methyl-4-((E)-(3-((E)-styryl)cyclopentylidene)methyl)benzene (3f')** : solid; m.p. 80-82 °C; <sup>1</sup>H NMR (CDCl<sub>3</sub>, 400MHz) δ: 7.35 (d, *J* = 7.6 Hz, 2H), 7.31-7.17 (m, 5H), 7.13 (d, *J* = 7.6 Hz, 2H), 6.44 (d, *J* = 16.0 Hz, 1H), 6.34 (s, 1H), 6.23 (dd, *J* = 7.2 Hz, *J* = 16.0 Hz, 1H), 2.77-2.69 (m, 3H), 2.61-2.53 (m, 1H), 2.47-2.40 (m, 1H), 2.33(s, 3H), 2.11-2.04 (m, 1H), 1.71-1.61 (m, 1H). <sup>13</sup>C NMR (100 MHz, CDCl<sub>3</sub>) δ: 144.6, 137.6, 135.8, 135.4, 133.9, 128.9, 128.8, 128.6, 128.5, 128.2, 127.9, 126.9, 126.0, 121.2, 42.7, 42.6, 33.9, 30.7, 21.1. Anal. Calcd. for C<sub>21</sub>H<sub>22</sub> : C, 91.92; H, 8.08. Found: C, 91.80; H, 8.26.

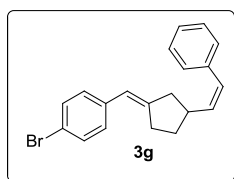

**1-bromo-4-((E)-(3-((Z)-styryl)cyclopentylidene)methyl)benzene (3g)** : solid; m.p. 85-87 °C; <sup>1</sup>H NMR (CDCl<sub>3</sub>, 400MHz) δ: 7.42 (d, *J* = 8.4 Hz, 2H), 7.35-7.21 (m, 5H), 7.14 (d, *J* = 8.4 Hz, 2H), 6.44 (d, *J* = 11.6 Hz, 1H), 6.28 (s, 1H), 5.59 (t, *J* = 10.8 Hz, 1H), 3.18-3.07 (m, 1H), 2.73-2.68 (m, 2H), 2.54-2.45 (m, 1H), 2.41-2.34 (m, 1H), 2.08-2.07 (m, 1H), 1.69-1.59 (m, 1H). <sup>13</sup>C NMR (100 MHz, CDCl<sub>3</sub>) δ: 146.7, 137.6, 137.4, 136.2, 131.3, 129.5, 128.9, 128.6, 128.2, 126.7, 120.3, 119.4, 43.6, 38.0, 34.5, 30.8. MS(EI): *m/z*(%): 171(24.4), 169(66.7), 155(63.8), 141(32.6), 129(100.0), 115 (52.9), 91 (54.3).

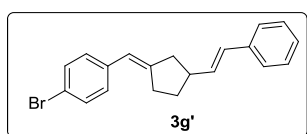

**1-bromo-4-((E)-(3-((E)-styryl)cyclopentylidene)methyl)benzene (3g')** : solid; m.p. 128-130 °C; <sup>1</sup>H NMR (CDCl<sub>3</sub>, 400MHz) δ: 7.42 (d, *J* = 8.4 Hz, 2H), 7.36-7.15 (m, 7H), 6.44 (d, *J* = 16.0 Hz, 1H), 6.30 (s, 1H), 6.21 (dd, *J* = 7.2 Hz, *J* = 15.6 Hz, 1H), 2.78-2.67 (m, 3H), 2.57-2.39 (m, 2H), 2.11-2.07 (m, 1H), 1.72-1.62 (m, 1H). <sup>13</sup>C NMR (100 MHz, CDCl<sub>3</sub>) δ: 146.7, 137.5, 137.4, 133.6, 131.3, 129.5, 129.0, 128.5, 127.0, 126.0, 120.4, 119.4, 42.8, 42.6, 33.8, 30.8. Anal. Calcd. for C<sub>20</sub>H<sub>19</sub>Br : C, 70.80; H, 5.64. Found: C, 71.01; H, 5.72.

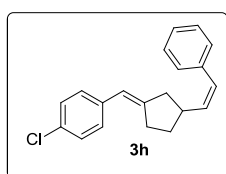

**1-chloro-4-((E)-(3-((Z)-styryl)cyclopentylidene)methyl)benzene (3h)** : solid; m.p.80-82 °C; <sup>1</sup>H NMR (CDCl<sub>3</sub>, 400MHz) δ: 7.35-7.19 (m, 9H), 6.44 (d, *J* = 11.6 Hz, 1H), 6.30 (s, 1H), 5.59 (dd, *J* = 10.0 Hz, *J* = 11.6 Hz, 1H), 3.15-3.09 (m, 1H), 2.74-2.67 (m, 2H), 2.55-2.35 (m, 2H), 2.09-2.04 (m, 1H), 1.69-1.61 (m, 1H). <sup>13</sup>C NMR (100 MHz, CDCl<sub>3</sub>) δ: 146.5, 137.6, 137.0, 136.2, 131.3, 129.1, 128.9, 128.6, 128.3, 128.2, 126.7, 120.3, 43.6, 38.0, 34.5, 30.8. MS(EI): *m/z*(%): 294(87.2), 203(20.3), 190(100.0), 169(31.7), 159(39.7), 155 (54.8), 129(85.8), 91 (48.8).

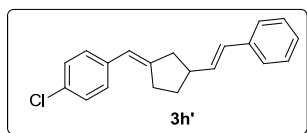

**1-chloro-4-((E)-(3-((E)-styryl)cyclopentylidene)methyl)benzene (3h')** : solid; m.p.132-134 °C; <sup>1</sup>H NMR (CDCl<sub>3</sub>, 400MHz) δ: 7.35 (d, *J* = 7.6 Hz, 2H), 7.31-7.18 (m, 7H), 6.44 (d, *J* = 15.6 Hz, 1H), 6.32 (s, 1H), 6.24 (dd, *J* = 7.2 Hz, *J* = 15.6 Hz, 1H), 2.79-2.68 (m, 3H), 2.59-2.40 (m, 2H), 2.12-2.07 (m, 1H), 1.73-1.63 (m, 1H). <sup>13</sup>C NMR (100 MHz, CDCl<sub>3</sub>) δ: 146.5, 137.6, 137.0, 133.6, 131.3, 129.2, 129.0, 128.5, 128.3, 127.0, 126.0, 120.3, 42.8, 42.6, 33.8, 30.7. Anal. Calcd. for C<sub>20</sub>H<sub>19</sub>Cl : C, 81.48; H, 6.50. Found: C, 81.29; H, 6.63.

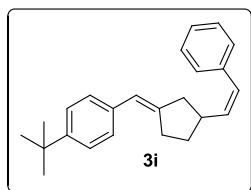

**1-(tert-butyl)-4-((E)-(3-((Z)-styryl)cyclopentylidene)methyl)benzene (3i)** : oil; <sup>1</sup>H NMR (CDCl<sub>3</sub>, 400MHz) δ: 7.35-7.27 (m, 6H), 7.25-7.22 (m, 3H), 6.43 (d, *J* = 11.6 Hz, 1H), 6.33 (s, 1H), 5.60 (dd, *J* = 10.0 Hz, *J* = 11.6 Hz, 1H), 3.17-3.06 (m, 1H), 2.78-2.68 (m, 2H), 2.59-2.50 (m, 1H), 2.42-2.35 (m, 1H), 2.10-2.04 (m, 1H), 1.68-1.56 (m, 1H), 1.31 (s, 9H). <sup>13</sup>C NMR (100 MHz, CDCl<sub>3</sub>) δ: 148.7, 144.8, 137.7, 136.6, 135.7, 128.6, 128.2, 127.7, 126.6, 125.1, 121.1, 43.6, 38.0, 34.6, 34.4, 31.3, 30.7. MS(EI): *m/z*(%): 316(100.0), 301(28.9), 259(13.1), 212(35.3), 211(17.0), 197 (34.5), 169(30.4), 155 (34.5).

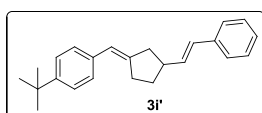

**1-(tert-butyl)-4-((E)-(3-((E)-styryl)cyclopentylidene)methyl)benzene (3i')** : solid; m.p. 88-90 °C; <sup>1</sup>H NMR (CDCl<sub>3</sub>, 400MHz) δ: 7.36-7.23 (m, 8H), 7.21-7.17 (m, 1H), 6.44 (d, *J* = 16.0 Hz, 1H), 6.35 (s, 1H), 6.23 (dd, *J* = 7.2 Hz, *J* = 16.0 Hz, 1H), 2.79-2.69 (m, 3H), 2.63-2.54 (m, 1H), 2.47-2.40 (m, 1H), 2.08-2.06 (m, 1H), 1.71-1.60 (m, 1H), 1.32 (s, 9H). <sup>13</sup>C NMR (100 MHz, CDCl<sub>3</sub>) δ: 148.6, 144.8, 137.6, 135.8, 134.0, 128.8, 128.5, 127.7, 126.9, 126.0, 125.1, 121.1, 42.8, 42.7, 34.4, 33.9, 31.3, 30.7. Anal. Calcd. for C<sub>24</sub>H<sub>28</sub> : C, 91.08; H, 8.92. Found: C, 90.93; H, 8.84.

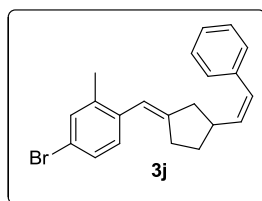

**4-bromo-2-methyl-1-((E)-(3-((Z)-styryl)cyclopentylidene)methyl)benzene (3j)** : oil;  $^1\text{H}$  NMR ( $\text{CDCl}_3$ , 400MHz)  $\delta$ : 7.36-7.22 (m, 7H), 7.13 (d,  $J = 8.4$  Hz, 1H), 6.44 (d,  $J = 11.6$  Hz, 1H), 6.30 (s, 1H), 5.61 (dd,  $J = 10.0$ Hz,  $J = 11.6$  Hz, 1H), 3.16-3.11 (m, 1H), 2.75-2.69 (m, 1H), 2.54-2.51 (m, 1H), 2.42-2.33 (m, 2H), 2.24 (s, 3H), 2.04-2.01 (m, 1H), 1.60-1.53 (m, 1H).  $^{13}\text{C}$  NMR (100 MHz,  $\text{CDCl}_3$ )  $\delta$ : 146.5, 138.0, 137.7, 136.5, 136.4, 132.6, 129.5, 128.7, 128.6, 128.4, 128.2, 126.6, 119.5, 118.4, 42.8, 38.0, 34.2, 30.3, 19.8. MS(EI):  $m/z$ (%): 185(25.7), 183(28.6), 169(78.1), 154(24.4), 141 (56.5), 128(100.0), 115(47.8), 91 (58.8).

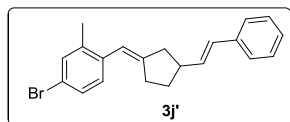

**4-bromo-2-methyl-1-((E)-(3-((E)-styryl)cyclopentylidene)methyl)benzene (3j')** : oil;  $^1\text{H}$  NMR ( $\text{CDCl}_3$ , 400MHz)  $\delta$ : 7.36-7.18 (m, 7H), 7.15 (d,  $J = 8.0$  Hz, 1H), 6.44 (d,  $J = 15.6$  Hz, 1H), 6.33 (s, 1H), 6.23 (dd,  $J = 7.2$  Hz,  $J = 15.6$  Hz, 1H), 2.80-2.70 (m, 2H), 2.58-2.52 (m, 1H), 2.45-2.36 (m, 2H), 2.25 (s, 3H), 2.06-2.00 (m, 1H), 1.66-1.56 (m, 1H).  $^{13}\text{C}$  NMR (100 MHz,  $\text{CDCl}_3$ )  $\delta$ : 146.4, 138.0, 137.6, 136.4, 133.8, 132.6, 129.5, 128.9, 128.5, 128.4, 127.0, 126.0, 119.5, 118.4, 42.7, 41.9, 33.4, 30.2, 19.8. Anal. Calcd. for  $\text{C}_{21}\text{H}_{22}\text{Br}$  : C, 71.39; H, 5.99. Found: C, 71.51; H, 6.18.

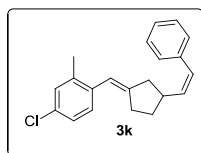

**4-chloro-2-methyl-1-((E)-(3-((Z)-styryl)cyclopentylidene)methyl)benzene (3k)** : oil;  $^1\text{H}$  NMR ( $\text{CDCl}_3$ , 400MHz)  $\delta$ : 7.36-7.17 (m, 6H), 7.2 (t,  $J = 4.0$  Hz, 2H), 6.44 (d,  $J = 11.6$  Hz, 1H), 6.32 (s, 1H), 5.60 (dd,  $J = 10.0$  Hz,  $J = 11.6$  Hz, 1H), 3.19-3.08 (m, 1H), 2.76-2.70 (m, 1H), 2.59-2.52 (m, 1H), 2.42-2.34 (m, 2H), 2.24 (s, 3H), 2.05-1.99 (m, 1H), 1.63-1.52 (m, 1H).  $^{13}\text{C}$  NMR (100 MHz,  $\text{CDCl}_3$ )  $\delta$ : 146.3, 137.7, 137.7, 136.5, 136.0, 131.3, 130.0, 129.1, 128.6, 128.6, 128.2, 126.6, 125.5, 118.3, 42.7, 38.0, 34.2, 30.3, 19.9. MS(EI):  $m/z$ (%): 310(33.8), 308(100.0), 217(15.9), 204(95.6), 169(63.2), 143 (60.3), 127(27.5), 91 (49.3).

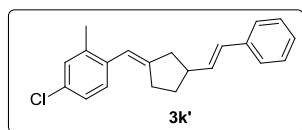

**4-chloro-2-methyl-1-((E)-(3-((E)-styryl)cyclopentylidene)methyl)benzene (3k')** : solid; m.p. 68-70  $^{\circ}\text{C}$ ;  $^1\text{H}$  NMR ( $\text{CDCl}_3$ , 400MHz)  $\delta$ : 7.37-7.35 (m, 2H), 7.31-7.28 (m, 2H), 7.24-7.18 (m, 2H), 7.14-7.10 (m, 2H), 6.44 (d,  $J = 16.0$  Hz, 1H), 6.35 (s, 1H), 6.23 (dd,  $J = 7.2$  Hz,  $J = 16.0$  Hz, 1H), 2.80-2.71 (m, 2H), 2.59-2.52 (m, 1H), 2.45-2.37 (m, 2H), 2.25 (s, 3H), 2.05-2.00 (m, 1H), 1.66-1.58 (m, 1H).  $^{13}\text{C}$  NMR (100 MHz,  $\text{CDCl}_3$ )  $\delta$ : 146.3, 137.7, 137.6, 136.0, 133.9, 131.3, 129.7, 129.2, 128.9, 128.5, 127.0, 126.0, 125.5, 118.4, 42.7, 41.8, 33.5, 30.2, 19.9. Anal. Calcd. for  $\text{C}_{21}\text{H}_{21}\text{Cl}$  : C, 81.67; H, 6.85. Found: C, 81.70; H, 6.74.

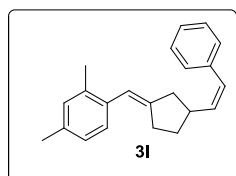



**2,4-dimethyl-1-((E)-(3-((Z)-styryl)cyclopentylidene)methyl)benzene (3l)** : oil;  $^1\text{H}$  NMR ( $\text{CDCl}_3$ , 400MHz)  $\delta$ : 7.36-7.17 (m, 6H), 6.96 (d,  $J = 8.0$  Hz, 2H), 6.43 (d,  $J = 11.6$  Hz, 1H), 6.37 (s, 1H), 5.61 (dd,  $J = 10.0$  Hz,  $J = 11.6$  Hz, 1H), 3.16-3.10 (m, 1H), 2.76-2.70 (m, 1H), 2.62-2.56 (m, 1H), 2.46-2.37 (m, 2H), 2.29 (s, 3H), 2.25 (s, 3H), 2.04-2.00 (m, 1H), 1.62-1.53 (m, 1H).  $^{13}\text{C}$  NMR (100 MHz,  $\text{CDCl}_3$ )  $\delta$ : 144.8, 137.7, 136.8, 135.6, 135.6, 134.6, 130.7, 128.6, 128.4, 128.2, 127.8, 126.7, 126.1, 119.1, 42.7, 38.0, 34.3, 30.3, 21.0, 20.0. MS(EI):  $m/z$ (%): 288(100.0), 184(51.0), 169(35.7), 158(24.4), 128(43.1), 91 (26.6), 44 (23.0).

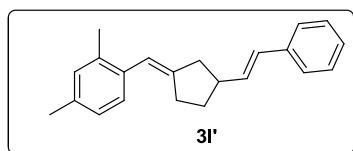

**2,4-dimethyl-1-((E)-(3-((E)-styryl)cyclopentylidene)methyl)benzene (3l')** : oil;  $^1\text{H}$  NMR ( $\text{CDCl}_3$ , 400MHz)  $\delta$ : 7.37-7.35 (m, 2H), 7.31-7.27 (m, 2H), 7.23-7.18 (m, 2H), 6.97 (d,  $J = 7.2$  Hz, 2H), 6.46 (s, 1H), 6.41 (d,  $J = 8.8$  Hz, 1H), 6.24 (dd,  $J = 8.4$  Hz,  $J = 16.0$  Hz, 1H), 2.77-2.71 (m, 2H), 2.64-2.57 (m, 1H), 2.49-2.40 (m, 2H), 2.30 (s, 3H), 2.26 (s, 3H), 2.03-2.00 (m, 1H), 1.63-1.57 (m, 1H).  $^{13}\text{C}$  NMR (100 MHz,  $\text{CDCl}_3$ )  $\delta$ : 144.7, 137.7, 135.6, 135.6, 134.6, 134.2, 130.7, 128.7, 128.5, 127.8, 126.9, 126.1, 126.0, 119.2, 42.7, 41.9, 33.5, 30.2, 21.0, 20.0. Anal. Calcd. for  $\text{C}_{22}\text{H}_{24}$  : C, 91.61; H, 8.39. Found: C, 91.76; H, 8.52.

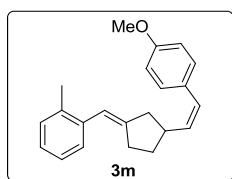

**1-((E)-(3-((Z)-4-methoxystyryl)cyclopentylidene)methyl)-2-methylbenzene (3m)** : oil;  $^1\text{H}$  NMR ( $\text{CDCl}_3$ , 400MHz)  $\delta$ : 7.29-7.22 (m, 3H), 7.15-7.09 (m, 3H), 6.89-6.87 (m, 2H), 6.39 (d,  $J = 8.8$  Hz, 1H), 6.35 (s, 1H), 5.53 (dd,  $J = 8.8$  Hz,  $J = 11.2$  Hz, 1H), 3.81 (s, 3H), 3.16-3.11 (m, 1H), 2.77-2.72 (m, 1H), 2.63-2.57 (m, 1H), 2.45-2.34 (m, 2H), 2.28 (s, 3H), 2.04-2.01 (m, 1H), 1.61-1.51 (m, 1H).  $^{13}\text{C}$  NMR (100 MHz,  $\text{CDCl}_3$ )  $\delta$ : 158.3, 145.6, 137.5, 135.8, 135.3, 130.3, 129.8, 129.8, 128.0, 128.0, 126.1, 125.4, 119.3, 113.6, 55.3, 42.7, 38.0, 34.3, 30.3, 20.0. MS(EI):  $m/z$ (%): 304(100.0), 199(23.1), 170(48.5), 155(19.9), 134(35.2), 121 (50.8), 91(15.7), 44 (13.3). HRMS-ESI ( $m/z$ ) [ $\text{M} + \text{H}$ ] $^+$  calcd for  $\text{C}_{22}\text{H}_{25}\text{O}_1$ : 305.1900; Found, 305.1897.

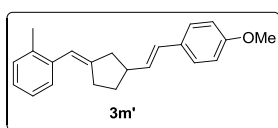

**1-((E)-(3-((E)-4-methoxystyryl)cyclopentylidene)methyl)-2-methylbenzene (3m')** : oil;  $^1\text{H}$  NMR ( $\text{CDCl}_3$ , 400MHz)  $\delta$ : 7.31-7.28 (m, 3H), 7.23-7.07 (m, 3H), 6.84 (d,  $J = 8.8$  Hz, 2H), 6.41 (d,  $J = 5.6$  Hz, 1H), 6.37 (s, 1H), 6.09 (dd,  $J = 6.8$  Hz,  $J = 15.6$  Hz, 1H), 3.79 (s, 3H), 2.77-2.71 (m, 2H), 2.63-2.56 (m, 1H), 2.49-2.38 (m, 2H), 2.29 (s, 3H), 2.04-1.99 (m, 1H), 1.64-1.54 (m, 1H).  $^{13}\text{C}$  NMR (100 MHz,  $\text{CDCl}_3$ )  $\delta$ : 158.7, 145.6, 137.6, 135.8, 132.0, 130.5, 129.8, 128.1, 128.0, 127.1, 126.1, 125.4, 119.3, 113.9, 55.3, 42.7, 42.0, 33.6, 30.2, 20.0. HRMS-ESI ( $m/z$ ) [ $\text{M} + \text{H}$ ] $^+$  calcd for  $\text{C}_{22}\text{H}_{25}\text{O}_1$ : 305.1900; Found, 305.1897.

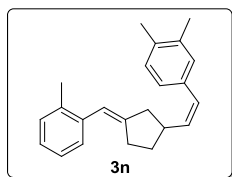

**1,2-dimethyl-4-((Z)-2-((E)-3-(2-methylbenzylidene)cyclopentyl)vinyl)benzene (3n)** : oil;  $^1\text{H}$  NMR ( $\text{CDCl}_3$ , 400MHz)  $\delta$ : 7.28 (d,  $J = 7.2$  Hz, 1H), 7.14-7.04 (m, 6H), 6.39 (s, 1H), 6.36 (s, 1H), 5.56 (t,  $J = 11.2$  Hz, 1H), 3.20-3.10 (m, 1H), 2.77-2.71 (m, 1H), 2.63-2.56 (m, 1H), 2.46-2.36 (m, 2H), 2.28 (s, 3H), 2.27 (s, 3H), 2.26 (s, 3H), 2.03-2.00 (m, 1H), 1.61-1.51 (m, 1H).  $^{13}\text{C}$  NMR (100 MHz,  $\text{CDCl}_3$ )  $\delta$ : 145.7, 137.5, 136.3, 136.0, 135.8, 135.3, 135.0, 130.0, 129.8, 129.5, 128.4, 128.0, 126.1, 126.0, 125.4, 119.3, 42.8, 38.1, 34.3, 30.3, 20.0, 19.9, 19.5. MS(EI):  $m/z$ (%): 302(100.0), 287(19.8), 236(25.1), 197(22.5), 183(19.9), 170 (72.0), 155(30.0), 143 (25.9).

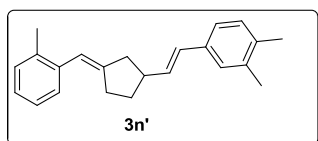

**1,2-dimethyl-4-((E)-2-((E)-3-(2-methylbenzylidene)cyclopentyl)vinyl)benzene (3n')** : oil;  $^1\text{H}$  NMR ( $\text{CDCl}_3$ , 400MHz)  $\delta$ : 7.31-7.29(m, 1H), 7.17-7.04 (m, 6H), 6.41 (d,  $J = 5.6$  Hz, 1H), 6.37 (s, 1H), 6.18 (dd,  $J = 7.2$  Hz,  $J = 16.0$  Hz, 1H), 2.78-2.73 (m, 2H), 2.63-2.57 (m, 1H), 2.49-2.39 (m, 2H), 2.29 (s, 3H), 2.25 (s, 3H), 2.24 (s, 3H), 2.04-2.00 (m, 1H), 1.64-1.54 (m, 1H).  $^{13}\text{C}$  NMR (100 MHz,  $\text{CDCl}_3$ )  $\delta$ : 145.6, 137.6, 136.5, 135.8, 135.3, 133.0, 129.8, 129.8, 128.6, 128.0, 127.2, 126.1, 125.4, 123.5, 119.3, 42.7, 41.9, 33.6, 30.2, 20.0, 19.8, 19.5. Anal. Calcd. for  $\text{C}_{23}\text{H}_{26}$  : C, 91.34; H, 8.66. Found: C, 91.30; H, 8.72.

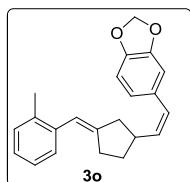

**5-((Z)-2-((E)-3-(2-methylbenzylidene)cyclopentyl)vinyl)benzo[d][1,3]dioxole (3o)** : oil;  $^1\text{H}$  NMR ( $\text{CDCl}_3$ , 400MHz)  $\delta$ : 7.29-7.25(m, 1H), 7.15-7.07(m, 3H), 6.81-6.74(m, 3H), 6.40 (s, 1H), 6.33 (d,  $J = 11.6$  Hz, 1H), 5.95 (s, 2H), 5.53 (dd,  $J = 10.0$  Hz,  $J = 11.2$  Hz, 1H), 3.15-3.09 (m, 1H), 2.77-2.71 (m, 1H), 2.63-2.56 (m, 1H), 2.45-2.33 (m, 2H), 2.28 (s, 3H), 2.02-2.00 (m, 1H), 1.58-1.53 (m, 1H).  $^{13}\text{C}$  NMR (100 MHz,  $\text{CDCl}_3$ )  $\delta$ : 147.4, 146.2, 145.4, 137.5, 135.8, 131.8, 129.8, 128.1, 128.0, 126.1, 125.4, 122.2, 119.4, 108.9, 108.1, 100.9, 42.7, 38.0, 34.3, 30.3, 20.0. MS(EI):  $m/z$ (%): 318(100.0), 213(15.9), 182(20.9), 170(42.0), 148(44.5), 135 (24.3), 129(28.9), 115 (17.5). HRMS-ESI ( $m/z$ ) [ $\text{M} + \text{H}$ ] $^+$  calcd for  $\text{C}_{22}\text{H}_{23}\text{O}_2$ : 319.1693; Found, 319.1689.

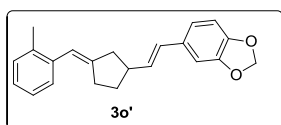

**5-((E)-2-((E)-3-(2-methylbenzylidene)cyclopentyl)vinyl)benzo[d][1,3]dioxole (3o')** : oil;  $^1\text{H}$  NMR ( $\text{CDCl}_3$ , 400MHz)  $\delta$ : 7.30-7.28(m, 1H), 7.17-7.08(m, 3H), 6.91 (d,  $J = 1.2$  Hz, 1H), 6.78-6.72(m, 2H), 6.42 (s, 1H), 6.35 (d,  $J = 16.0$  Hz, 1H), 6.06 (dd,  $J = 6.8$  Hz,  $J = 15.6$ Hz, 1H), 5.92 (s, 2H), 2.77-2.70 (m, 2H), 2.60-2.56 (m, 1H), 2.48-2.40 (m, 2H), 2.29 (s, 3H), 2.02-1.98 (m, 1H), 1.60-1.55 (m, 1H).  $^{13}\text{C}$  NMR (100 MHz,  $\text{CDCl}_3$ )  $\delta$ : 148.0,

146.7, 145.5, 137.5, 135.8, 132.4, 132.2, 129.8, 128.3, 128.0, 126.1, 125.4, 120.3, 119.4, 108.2, 105.4, 100.9, 42.6, 42.0, 33.6, 30.2, 20.0. HRMS-ESI ( $m/z$ ) [ $M + H$ ]<sup>+</sup> calcd for C<sub>22</sub>H<sub>23</sub>O<sub>2</sub>: 319.1693; Found, 319.1689.

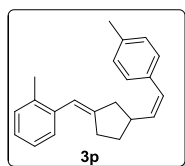

**1-methyl-2-((E)-3-((Z)-4-methylstyryl)cyclopentylidene)methyl)benzene (3p)** : oil; <sup>1</sup>H NMR (CDCl<sub>3</sub>, 400MHz) δ: 7.28 (d,  $J = 7.2$  Hz, 1H), 7.20-7.07(m, 7H), 6.41-6.38(m, 2H), 5.70 (t,  $J = 10.4$  Hz, 1H), 3.20-3.09 (m, 1H), 2.77-2.71 (m, 1H), 2.63-2.56 (m, 1H), 2.44-2.35 (m, 5H), 2.28 (s, 3H), 2.04-2.00 (m, 1H), 1.61-1.51 (m, 1H). <sup>13</sup>C NMR (100 MHz, CDCl<sub>3</sub>) δ: 145.6, 137.5, 136.3, 136.1, 135.8, 134.8, 129.8, 128.9, 128.5, 128.3, 127.9, 126.1, 125.4, 119.3, 42.7, 38.1, 34.3, 30.3, 21.2, 20.0. MS(EI):  $m/z$ (%): 288(100.0), 183(42.5), 170(89.8), 155(41.3), 142(29.5), 129 (74.4), 105(60.1), 91(15.1).

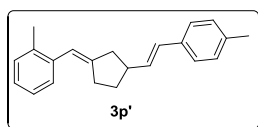

**1-methyl-2-((E)-3-((E)-4-methylstyryl)cyclopentylidene)methyl)benzene (3p')** : oil; <sup>1</sup>H NMR (CDCl<sub>3</sub>, 400MHz) δ: 7.31-7.23(m, 3H), 7.17-7.08(m, 5H), 6.43 (s, 1H), 6.39 (s, 1H), 6.18 (dd,  $J = 7.2$  Hz,  $J = 16.0$ Hz, 1H), 2.78-2.73(m, 2H), 2.63-2.57 (m, 1H), 2.49-2.39 (m, 2H), 2.32 (s, 3H), 2.29 (s, 3H), 2.03-2.00 (m, 1H), 1.64-1.54 (m, 1H). <sup>13</sup>C NMR (100 MHz, CDCl<sub>3</sub>) δ: 145.6, 137.5, 136.6, 135.8, 134.8, 133.0, 129.8, 129.2, 128.5, 128.0, 126.1, 125.9, 125.4, 119.3, 42.7, 41.9, 33.6, 30.2, 21.1, 20.0. Anal. Calcd. for C<sub>22</sub>H<sub>24</sub> : C, 91.61; H, 8.39. Found: C, 91.72; H, 8.48.

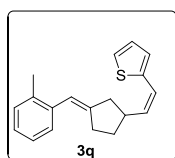

**2-((Z)-2-((E)-3-(2-methylbenzylidene)cyclopentyl)vinyl)thiophene (3q)** : oil; <sup>1</sup>H NMR (CDCl<sub>3</sub>, 400MHz) δ: 7.31 (d,  $J = 7.2$  Hz, 1H), 7.24 (s, 1H), 7.18-7.08 (m, 3H), 7.01-6.98 (m, 2H), 6.51 (d,  $J = 11.6$  Hz, 1H), 6.43 (s, 1H), 5.55 (dd,  $J = 10.0$  Hz,  $J = 11.2$ Hz, 1H), 3.39-3.33 (m, 1H), 2.87-2.81(m, 1H), 2.63-2.59 (m, 1H), 2.53-2.45 (m, 1H), 2.40-2.36 (m, 1H), 2.29 (s, 3H), 2.13-2.09 (m, 1H), 1.61-1.52 (m, 1H). <sup>13</sup>C NMR (100 MHz, CDCl<sub>3</sub>) δ: 145.3, 140.3, 137.5, 135.8, 135.0, 129.9, 128.0, 127.3, 126.8, 126.1, 125.4, 124.9, 121.3, 119.5, 42.2, 38.8, 33.7, 30.3, 20.0. MS(EI):  $m/z$ (%): 270(73.4), 182(37.3), 170(100.0), 155(36.4), 135(18.5), 129 (65.4), 105(30.4), 97 (20.8).

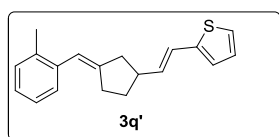

**2-((E)-2-((E)-3-(2-methylbenzylidene)cyclopentyl)vinyl)thiophene (3q')** : oil; <sup>1</sup>H NMR (CDCl<sub>3</sub>, 400MHz) δ: 7.29 (d,  $J = 7.2$  Hz, 1H), 7.15-7.08 (m, 4H), 6.94-6.88 (m, 2H), 6.56 (d,  $J = 15.6$  Hz, 1H), 6.42 (s, 1H), 6.08 (dd,  $J = 7.2$ Hz,  $J = 15.6$ Hz, 1H), 2.76-2.73(m, 2H), 2.62-2.56 (m, 1H), 2.48-2.38 (m, 2H), 2.28 (s, 3H), 2.03-1.97 (m,

1H), 1.63-1.51 (m, 1H). <sup>13</sup>C NMR (100 MHz, CDCl<sub>3</sub>) δ: 145.3, 142.9, 137.5, 135.8, 134.0, 129.8, 127.9, 127.2, 126.1, 125.4, 124.4, 123.2, 122.0, 119.5, 42.5, 41.7, 33.4, 30.1, 20.0. Anal. Calcd. for C<sub>19</sub>H<sub>20</sub>S : C, 81.38; H, 7.19. Found: C, 81.54; H, 7.31.

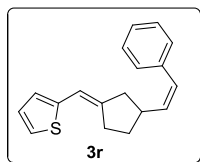

**2-((E)-3-((Z)-styryl)cyclopentylidene)methylthiophene (3r)** : solid; m.p. 72-74 °C; <sup>1</sup>H NMR (CDCl<sub>3</sub>, 400MHz) δ: 7.35-7.19 (m, 6H), 6.99 (dd, *J* = 3.6Hz, *J* = 5.2Hz, 1H), 6.89 (d, *J* = 3.2 Hz, 1H), 6.44 (d, *J* = 11.6 Hz, 1H), 5.60 (dd, *J* = 10.0Hz, *J* = 12.0Hz, 1H), 3.18-3.12(m, 1H), 2.74-2.67(m, 2H), 2.51-2.47 (m, 1H), 2.42-2.36 (m, 1H), 2.13-2.11 (m, 1H), 1.72-1.67 (m, 1H). <sup>13</sup>C NMR (100 MHz, CDCl<sub>3</sub>) δ: 144.1, 142.5, 137.6, 136.2, 128.8, 128.6, 128.2, 126.8, 126.6, 124.8, 123.9, 114.9, 43.1, 38.7, 34.4, 31.1. MS(EI): *m/z*(%): 266(100.0), 175(19.9), 162(43.8), 135(45.8), 129(31.0), 97 (28.0), 77 (10.2).

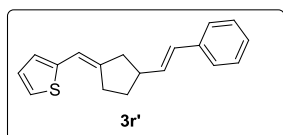

**2-((E)-3-((E)-styryl)cyclopentylidene)methylthiophene (3r')** : oil; <sup>1</sup>H NMR (CDCl<sub>3</sub>, 400MHz) δ: 7.36-7.20 (m, 6H), 7.02-7.00 (m, 1H), 6.91 (d, *J* = 3.2 Hz, 1H), 6.62 (s, 1H), 6.45 (d, *J* = 16.0 Hz, 1H), 6.23 (dd, *J* = 7.2Hz, *J* = 16.0Hz, 1H), 2.81-2.68 (m, 3H), 2.57-2.41 (m, 2H), 2.16-2.12 (m, 1H), 1.77-1.67 (m, 1H). <sup>13</sup>C NMR (100 MHz, CDCl<sub>3</sub>) δ: 144.1, 142.6, 137.6, 133.6, 129.0, 128.5, 127.0, 126.9, 126.0, 124.8, 123.9, 114.9, 43.3, 42.3, 33.7, 31.1. Anal. Calcd. for C<sub>18</sub>H<sub>18</sub>S : C, 81.15; H, 6.81. Found: C, 81.04; H, 6.92.

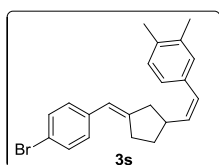

**4-((Z)-2-((E)-3-(4-bromobenzylidene)cyclopentyl)vinyl)-1,2-dimethylbenzene (3s)** : solid; m.p. 68-70 °C; <sup>1</sup>H NMR (CDCl<sub>3</sub>, 400MHz) δ: 7.42 (d, *J* = 8.4 Hz, 2H), 7.15 (d, *J* = 8.4 Hz, 2H), 7.10 (d, *J* = 8.0 Hz, 1H), 7.04 (d, *J* = 6.8 Hz, 2H), 6.39 (d, *J* = 11.2 Hz, 1H), 6.28 (s, 1H), 5.53 (dd, *J* = 10.0Hz, *J* = 11.6Hz, 1H), 3.16-3.10 (m, 1H), 2.73-2.66 (m, 2H), 2.54-2.45 (m, 1H), 2.40-2.31 (m, 1H), 2.26 (s, 3H), 2.25 (s, 3H), 2.11-2.05 (m, 1H), 1.68-1.57 (m, 1H). <sup>13</sup>C NMR (100 MHz, CDCl<sub>3</sub>) δ: 146.9, 137.4, 136.3, 135.4, 135.2, 135.1, 131.3, 130.0, 129.5, 129.5, 128.8, 125.9, 120.2, 119.4, 43.7, 38.0, 34.5, 30.8, 19.9, 19.5. MS(EI): *m/z*(%): 368(99.2), 366(99.0), 234(86.1), 197(59.3), 169(43.0), 157 (47.5), 128(100.0), 119 (77.2).

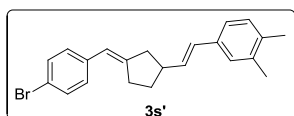

**4-((E)-2-((E)-3-(4-bromobenzylidene)cyclopentyl)vinyl)-1,2-dimethylbenzene (3s')** : solid; m.p. 110-112 °C; <sup>1</sup>H NMR (CDCl<sub>3</sub>, 400MHz) δ: 7.42 (d, *J* = 8.4 Hz, 2H), 7.17-7.14 (m, 3H), 7.10-7.04 (m, 2H), 6.38 (d, *J* = 16.0 Hz,

1H), 6.30 (s, 1H), 6.15 (dd,  $J = 7.2\text{Hz}$ ,  $J = 15.6\text{Hz}$ , 1H), 2.76-2.67 (m, 3H), 2.57-2.48 (m, 1H), 2.45-2.38 (m, 1H), 2.24 (s, 3H), 2.23 (s, 3H), 2.12-2.04 (m, 1H), 1.71-1.61 (m, 1H).  $^{13}\text{C}$  NMR (100 MHz,  $\text{CDCl}_3$ )  $\delta$ : 146.9, 137.5, 136.6, 135.4, 135.2, 132.4, 131.3, 129.8, 129.5, 128.9, 127.2, 123.5, 120.3, 119.4, 42.9, 42.6, 33.8, 30.8, 19.8, 19.5. Anal. Calcd. for  $\text{C}_{22}\text{H}_{23}\text{Br}$ : C, 71.94; H, 6.31. Found: C, 72.19; H, 6.47.

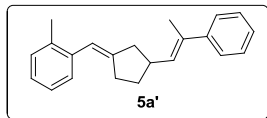

**1-methyl-2-((E)-3-((E)-2-phenylprop-1-en-1-yl)cyclopentylidene)methylbenzene (5a')** : oil;  $^1\text{H}$  NMR ( $\text{CDCl}_3$ , 400MHz)  $\delta$ : 7.41-7.39 (m, 2H), 7.33-7.30 (m, 3H), 7.25-7.21 (m, 1H), 7.18-7.10 (m, 3H), 6.42 (s, 1H), 5.75 (dd,  $J = 1.2\text{Hz}$ ,  $J = 8.8\text{Hz}$ , 1H), 2.98-2.96 (m, 1H), 2.79-2.73 (m, 1H), 2.61-2.59 (m, 1H), 2.49-2.46 (m, 1H), 2.38-2.30 (m, 4H), 2.10 (s, 3H), 2.04-2.01 (m, 1H), 1.56-1.51 (m, 1H).  $^{13}\text{C}$  NMR (100 MHz,  $\text{CDCl}_3$ )  $\delta$ : 145.8, 143.7, 137.5, 135.8, 134.3, 132.5, 129.8, 128.2, 127.9, 126.6, 126.1, 125.6, 125.4, 119.2, 42.3, 38.9, 33.8, 30.3, 20.1, 16.1. Anal. Calcd. for  $\text{C}_{22}\text{H}_{24}$ : C, 91.61; H, 8.39. Found: C, 91.70; H, 8.52.

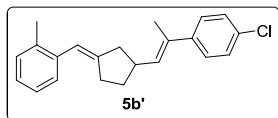

**1-((E)-3-((E)-2-(4-chlorophenyl)prop-1-en-1-yl)cyclopentylidene)methyl-2-methylbenzene (5b')** : oil;  $^1\text{H}$  NMR ( $\text{CDCl}_3$ , 400MHz)  $\delta$ : 7.33-7.25 (m, 5H), 7.16-7.10 (m, 3H), 6.42 (s, 1H), 5.73 (d,  $J = 8.8\text{ Hz}$ , 1H), 2.98-2.93 (m, 1H), 2.78-2.72 (m, 1H), 2.65-2.59 (m, 1H), 2.50-2.46 (m, 1H), 2.42-2.26 (m, 4H), 2.07-2.01 (m, 4H), 1.58-1.50 (m, 1H).  $^{13}\text{C}$  NMR (100 MHz,  $\text{CDCl}_3$ )  $\delta$ : 145.6, 142.1, 137.5, 135.8, 133.3, 133.0, 132.2, 129.9, 128.2, 127.9, 126.9, 126.1, 125.4, 119.3, 42.3, 38.9, 33.8, 30.3, 20.1, 16.0. Anal. Calcd. for  $\text{C}_{22}\text{H}_{23}\text{Cl}$ : C, 81.84; H, 7.18. Found: C, 81.67; H, 7.30.

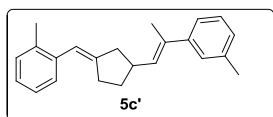

**1-methyl-2-((E)-3-((E)-2-(m-tolyl)prop-1-en-1-yl)cyclopentylidene)methylbenzene (5c')** : oil;  $^1\text{H}$  NMR ( $\text{CDCl}_3$ , 400MHz)  $\delta$ : 7.32-7.30 (m, 1H), 7.24-7.10 (m, 6H), 7.06-7.03 (m, 1H), 6.42 (s, 1H), 5.73 (dd,  $J = 1.2\text{ Hz}$ ,  $J = 8.8\text{ Hz}$ , 1H), 2.97-2.93 (m, 1H), 2.78-2.72 (m, 1H), 2.60-2.58 (m, 1H), 2.48-2.46 (m, 1H), 2.38-2.34 (m, 4H), 2.29 (s, 3H), 2.09 (s, 3H), 2.03-2.00 (m, 1H), 1.56-1.51 (m, 1H).  $^{13}\text{C}$  NMR (100 MHz,  $\text{CDCl}_3$ )  $\delta$ : 145.8, 143.8, 137.6, 135.8, 134.4, 132.3, 129.8, 128.1, 128.0, 127.3, 126.4, 126.1, 125.4, 122.7, 119.2, 42.3, 38.8, 33.8, 30.3, 21.5, 20.1, 16.1. Anal. Calcd. for  $\text{C}_{23}\text{H}_{26}$ : C, 91.34; H, 8.66. Found: C, 91.28; H, 8.74.

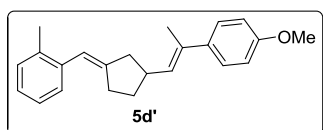

**1-((E)-3-((E)-2-(4-methoxyphenyl)prop-1-en-1-yl)cyclopentylidene)methyl-2-methylbenzene (5d')** : oil;  $^1\text{H}$  NMR ( $\text{CDCl}_3$ , 400MHz)  $\delta$ : 7.32-7.35 (m, 3H), 7.17-7.08 (m, 3H), 6.85 (d,  $J = 8.8\text{ Hz}$ , 2H), 6.42 (s, 1H), 5.67 (d,  $J = 8.8\text{ Hz}$ , 2H), 3.81 (s, 3H), 2.98-2.90 (m, 1H), 2.78-2.72 (m, 1H), 2.64-2.58 (m, 1H), 2.50-2.41 (m, 1H), 2.37-2.29

(m, 4H), 2.07-2.01 (m, 4H), 1.57-1.45 (m, 1H).  $^{13}\text{C}$  NMR (100 MHz,  $\text{CDCl}_3$ )  $\delta$ : 158.5, 145.9, 137.6, 136.3, 135.8, 133.7, 130.9, 129.8, 128.0, 126.6, 126.0, 125.4, 119.2, 113.5, 55.3, 42.4, 38.9, 33.9, 30.3, 20.1, 16.1. HRMS-ESI ( $m/z$ )  $[\text{M} + \text{H}]^+$  calcd for  $\text{C}_{23}\text{H}_{27}\text{O}_1$ : 319.2056; Found, 319.2064.

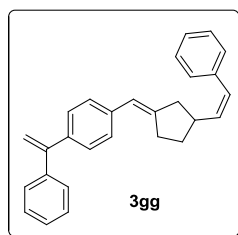

**1-(1-phenylvinyl)-4-((E)-(3-((Z)-styryl)cyclopentylidene)methyl)benzene (3gg)** : oil;  $^1\text{H}$  NMR ( $\text{CDCl}_3$ , 400MHz)  $\delta$ : 7.35-7.24 (m, 13H), 7.22-7.21 (m, 1H), 6.44 (d,  $J = 11.6$  Hz, 1H), 6.37 (s, 1H), 5.60 (dd,  $J = 10.0$  Hz,  $J = 11.2$  Hz, 1H), 5.47 (d,  $J = 1.2$  Hz, 1H), 5.41 (d,  $J = 1.2$  Hz, 1H), 3.14-3.10 (m, 1H), 2.76-2.70 (m, 2H), 2.58-2.53 (m, 1H), 2.44-2.37 (m, 1H), 2.10-2.07 (m, 1H), 1.67-1.61 (m, 1H).  $^{13}\text{C}$  NMR (100 MHz,  $\text{CDCl}_3$ )  $\delta$ : 149.7, 146.0, 141.5, 138.7, 138.0, 137.6, 136.4, 128.7, 128.6, 128.3, 128.2, 128.1, 128.1, 127.7, 127.6, 126.6, 121.0, 113.9, 43.7, 38.0, 34.6, 30.9. MS(EI):  $m/z$ (%): 362(100.0), 258(49.6), 193(25.5), 178(28.4), 129(50.7), 103(44.3), 57(34.0), 44(15.6).

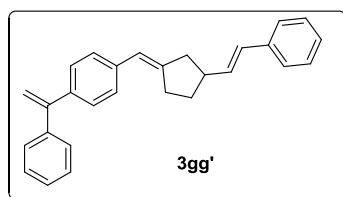

**1-(1-phenylvinyl)-4-((E)-(3-((E)-styryl)cyclopentylidene)methyl)benzene (3gg')** : oil;  $^1\text{H}$  NMR ( $\text{CDCl}_3$ , 400MHz)  $\delta$ : 7.37-7.27 (m, 13H), 7.23-7.18 (m, 1H), 6.45 (d,  $J = 15.6$  Hz, 1H), 6.39 (s, 1H), 6.23 (dd,  $J = 7.2$  Hz,  $J = 16.0$  Hz, 1H), 5.48 (d,  $J = 1.2$  Hz, 1H), 5.42 (d,  $J = 1.2$  Hz, 1H), 2.80-2.73 (m, 3H), 2.64-2.57 (m, 1H), 2.49-2.42 (m, 1H), 2.13-2.06 (m, 1H), 1.73-1.65 (m, 1H).  $^{13}\text{C}$  NMR (100 MHz,  $\text{CDCl}_3$ )  $\delta$ : 149.7, 146.0, 141.5, 138.7, 137.5, 133.8, 128.9, 128.5, 128.3, 128.1, 128.1, 127.7, 127.7, 127.0, 126.0, 121.0, 113.9, 42.9, 42.7, 33.8, 30.9.

## 5. References:

(1) Fulton, J. R.; Aggarwal, V. K.; de Vicente, J. Eur. J. Org. Chem. 2005, 1479.

## 6. Crystallographic data of 3g and 3e'

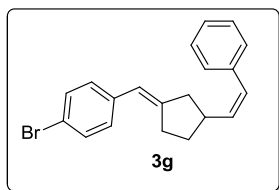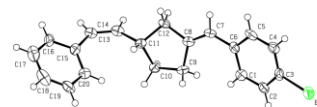

**Structure of 3g**

### Datablock:

|                        |                                             |                                    |
|------------------------|---------------------------------------------|------------------------------------|
| Bond precision:        | C-C = 0.0111 Å                              | Wavelength=0.71073                 |
| Cell:                  | a=6.0119(6)    b=15.8060(14)    c=8.3765(8) |                                    |
|                        | alpha=90    beta=98.292(9)    gamma=90      |                                    |
| Temperature:           | 291 K                                       |                                    |
|                        | Calculated                                  | Reported                           |
| Volume                 | 787.65(13)                                  | 787.65(13)                         |
| Space group            | P n                                         | P 1 n 1                            |
| Hall group             | -P 2yac                                     | -P 2yac                            |
| Moiety formula         | C <sub>20</sub> H <sub>19</sub> Br          | C <sub>20</sub> H <sub>19</sub> Br |
| Sum formula            | C <sub>20</sub> H <sub>19</sub> Br          | C <sub>20</sub> H <sub>19</sub> Br |
| Mr                     | 339.25                                      | 339.26                             |
| Dx, g cm <sup>-3</sup> | 1.430                                       | 1.430                              |
| Z                      | 2                                           | 2                                  |
| Mu (mm <sup>-1</sup> ) | 2.601                                       | 2.601                              |
| F000                   | 348.0                                       | 348.0                              |
| F000'                  | 347.54                                      |                                    |
| h,k,lmax               | 7,19,10                                     | 7,19,10                            |
| Nref                   | 3107[1563]                                  | 2032                               |
| Tmin,Tmax              | 0.395,0.695                                 | 0.021,1.000                        |
| Tmin'                  | 0.331                                       |                                    |
| Correction method=     | MULTI-SCAN                                  |                                    |
| Data completeness=     | 1.30/0.65                                   | Theta(max)= 26.010                 |
| R(reflections)=        | 0.0508( 1624)                               | wR2(reflections)= 0.0999( 2032)    |
| S =                    | 1.045                                       | Npar= 190                          |

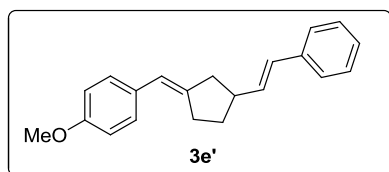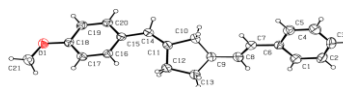

**Structure of 3e'**

**Datablock:**

|                    |                                             |                                 |
|--------------------|---------------------------------------------|---------------------------------|
| Bond precision:    | C-C = 0.0042 Å                              | Wavelength=0.71073              |
| Cell:              | a=17.7810(8)    b=15.3478(9)    c=6.0728(2) |                                 |
|                    | alpha=90    beta=99.114(5)    gamma=90      |                                 |
| Temperature:       | 295 K                                       |                                 |
|                    | Calculated                                  | Reported                        |
| Volume             | 1636.34(13)                                 | 1636.33(14)                     |
| Space group        | P 21/c                                      | P 1 21/c 1                      |
| Hall group         | -P 2ybc                                     | -P 2ybc                         |
| Moiety formula     | C21 H22 O                                   | C21 H22 O                       |
| Sum formula        | C21 H22 O                                   | C21 H22 O                       |
| Mr                 | 290.39                                      | 290.39                          |
| Dx,g cm-3          | 1.179                                       | 1.179                           |
| Z                  | 4                                           | 4                               |
| Mu (mm-1)          | 0.070                                       | 0.070                           |
| F000               | 624.0                                       | 624.0                           |
| F000'              | 624.25                                      |                                 |
| h,k,lmax           | 21,18,7                                     | 21,18,7                         |
| Nref               | 3222                                        | 3215                            |
| Tmin,Tmax          | 0.976,0.979                                 | 0.857,1.000                     |
| Tmin'              | 0.976                                       |                                 |
| Correction method= | MULTI-SCAN                                  |                                 |
| Data completeness= | 0.998                                       | Theta(max)= 26.020              |
| R(reflections)=    | 0.0705( 1792)                               | wR2(reflections)= 0.1875( 3215) |
| S =                | 1.075                                       | Npar= 209                       |



7.  $^1\text{H}$  NMR,  $^{13}\text{C}$  NMR spectra for products 3a-3s, 3a'-3s', 5a'-5d', 3gg and 3gg'

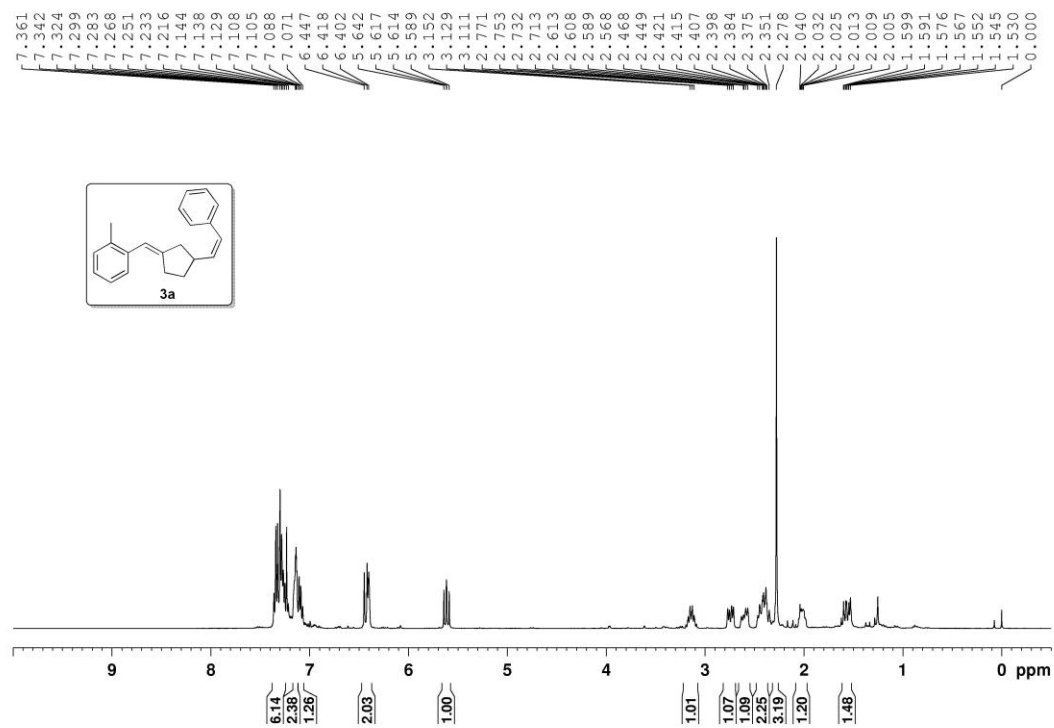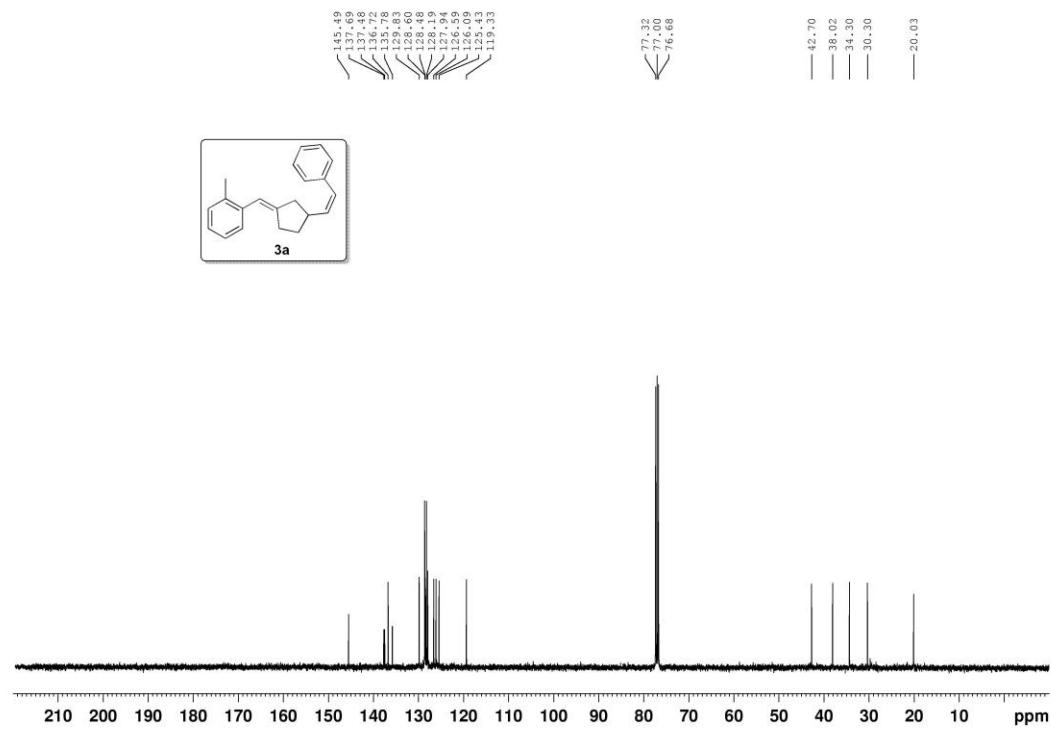

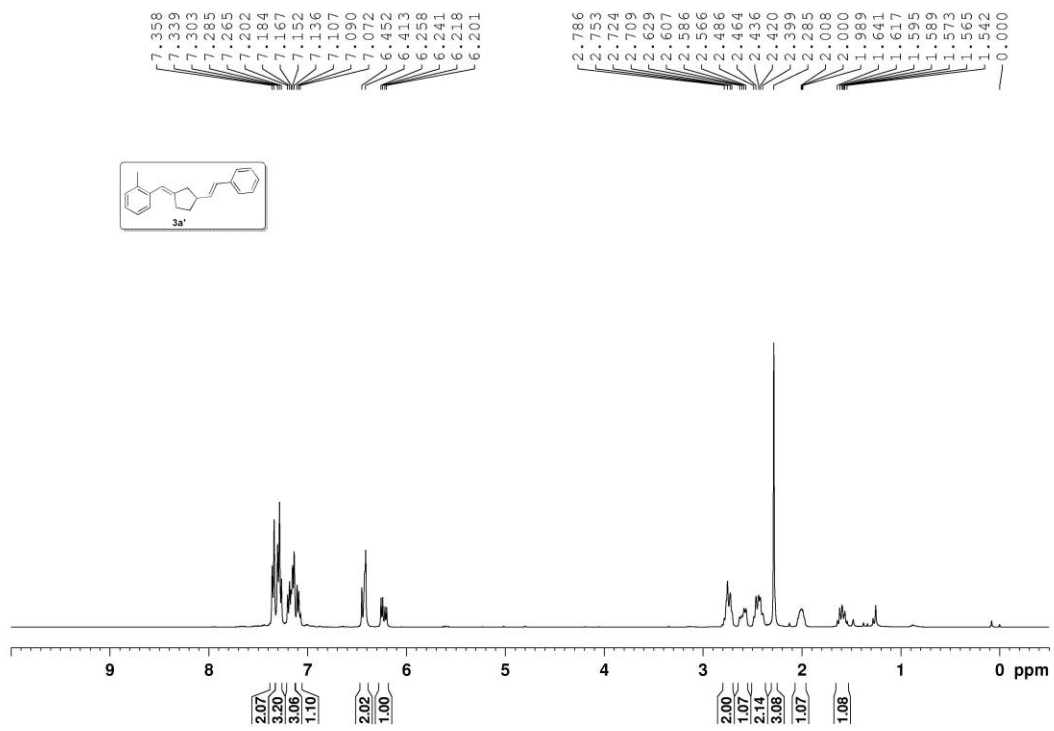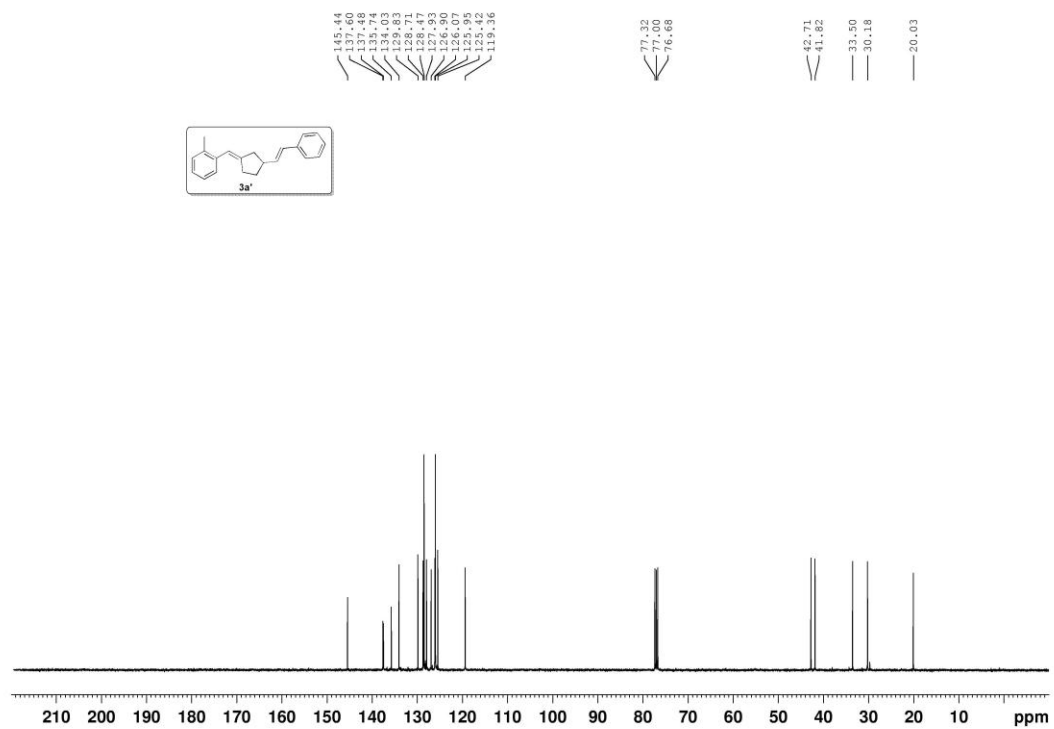

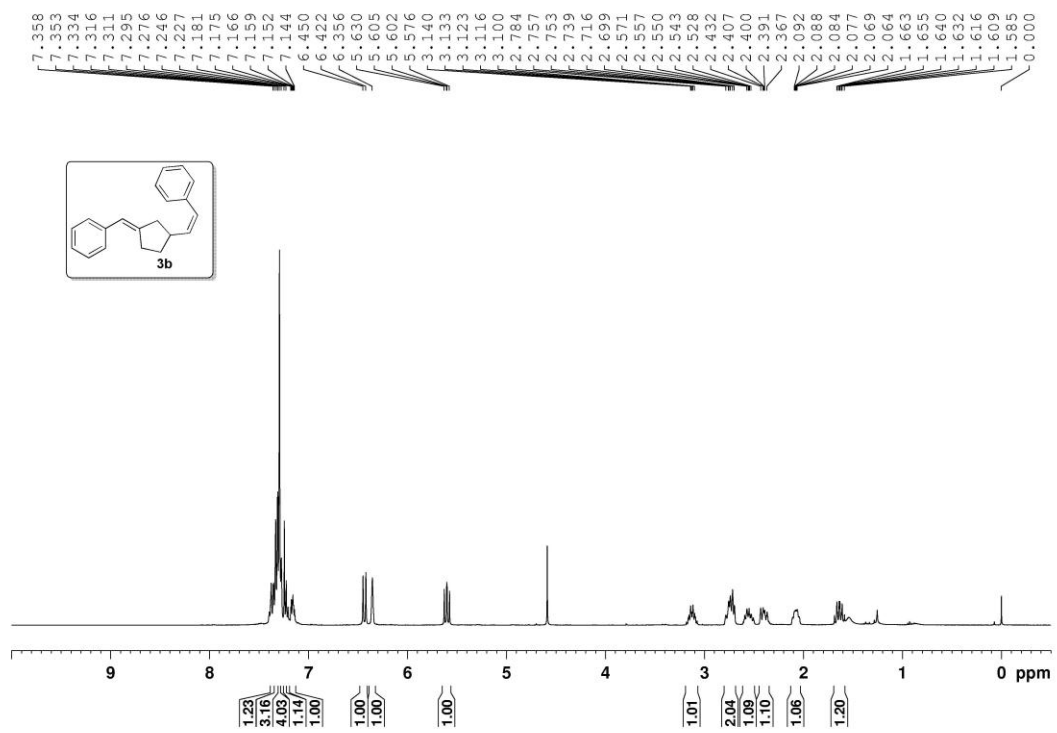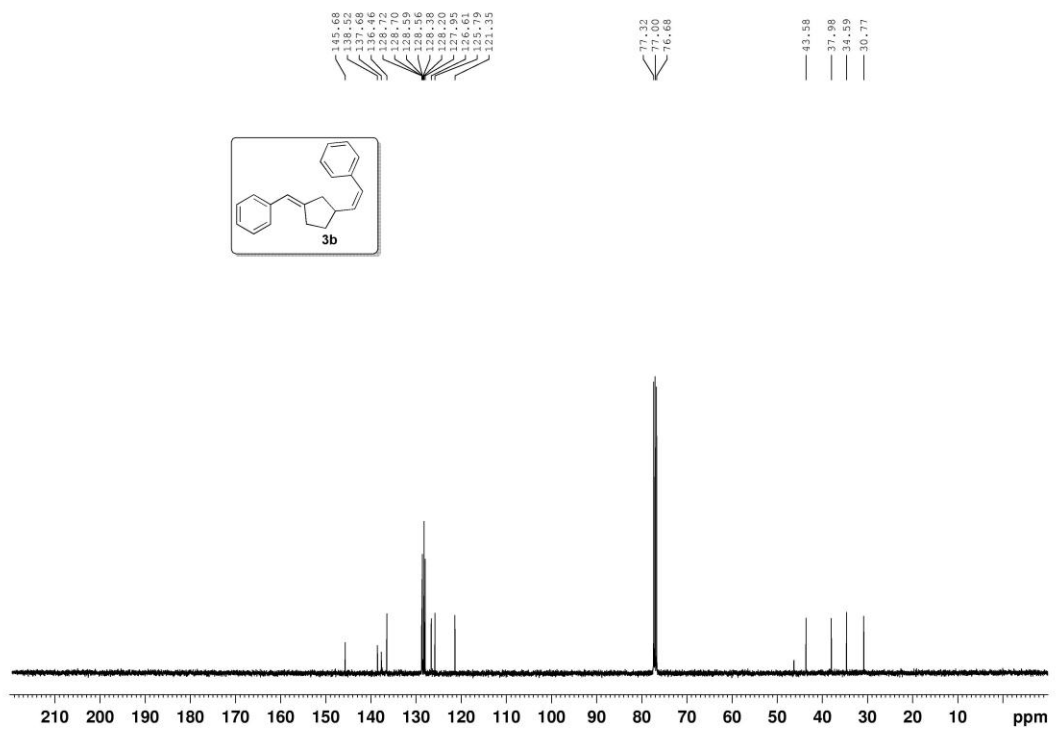

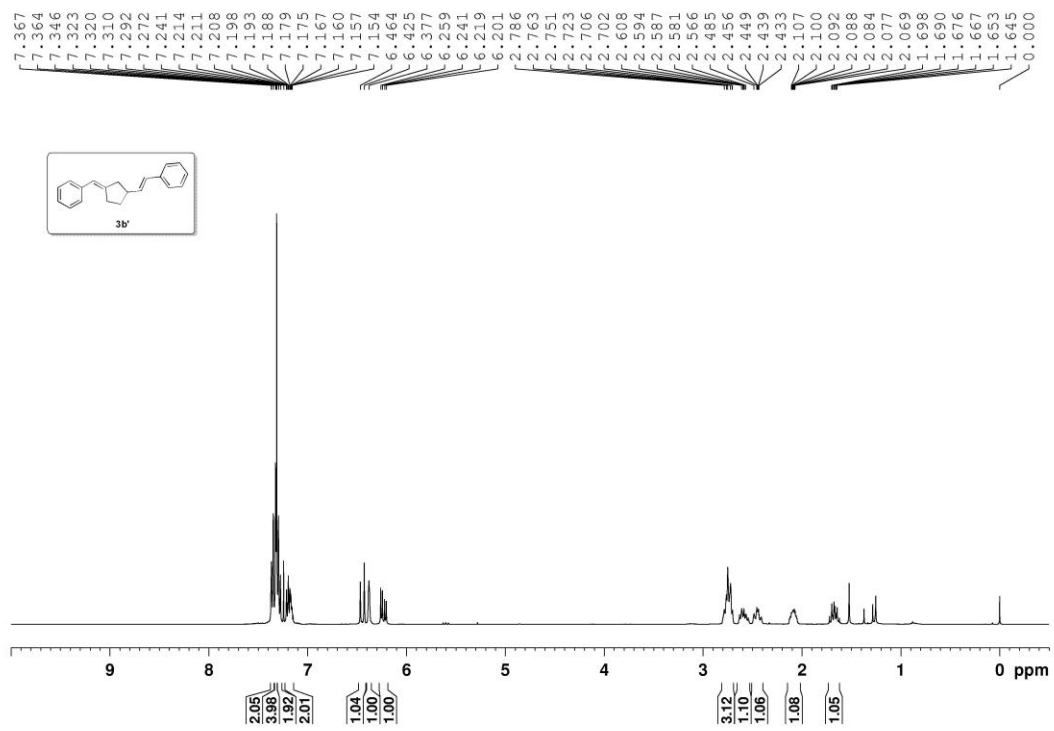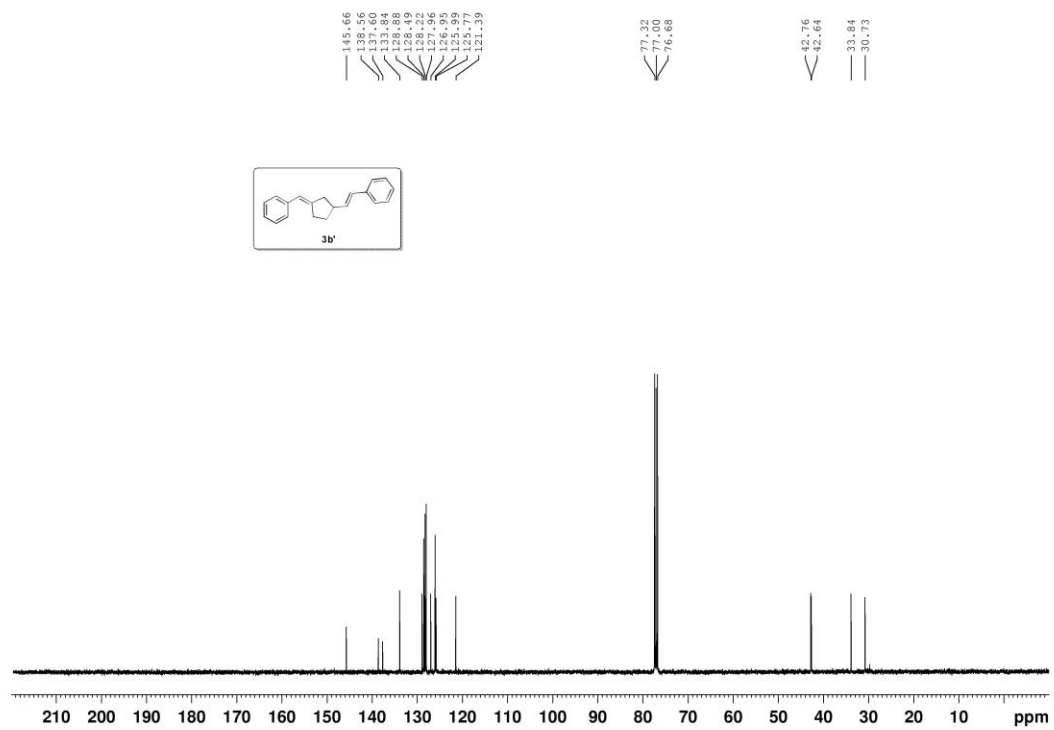

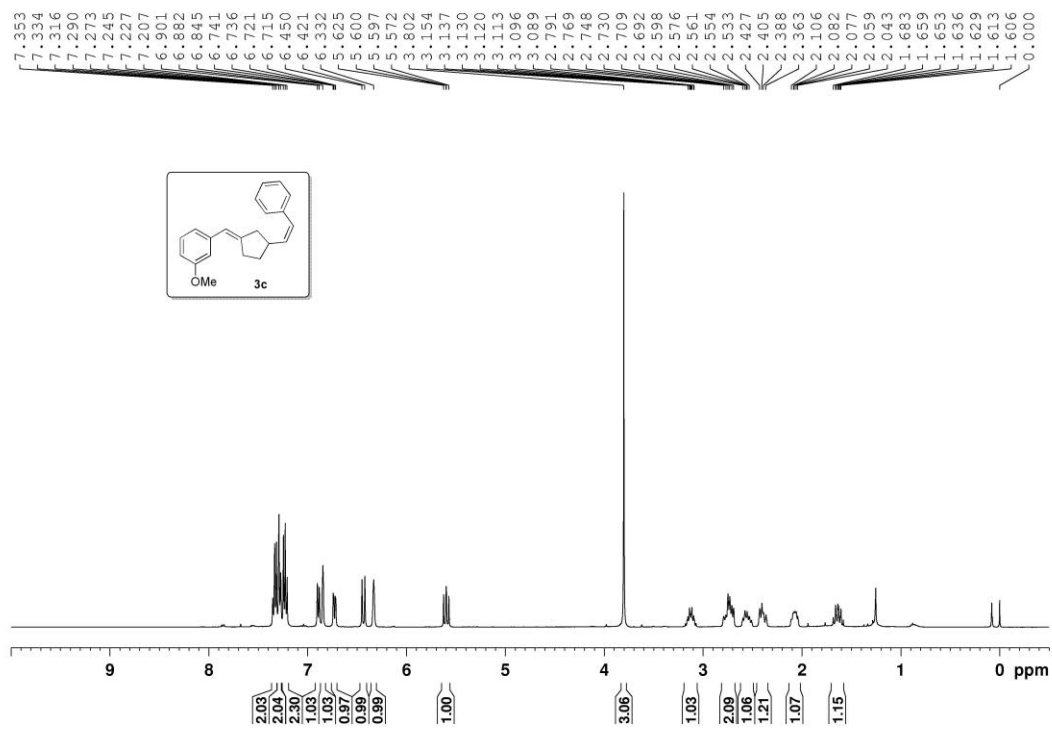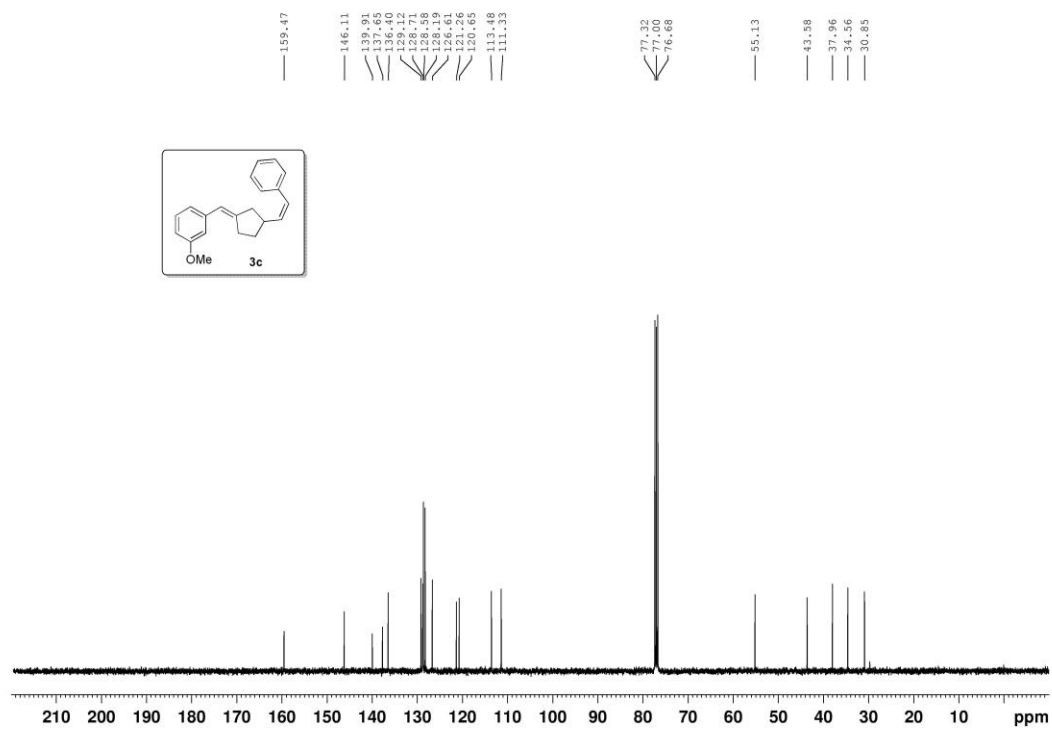

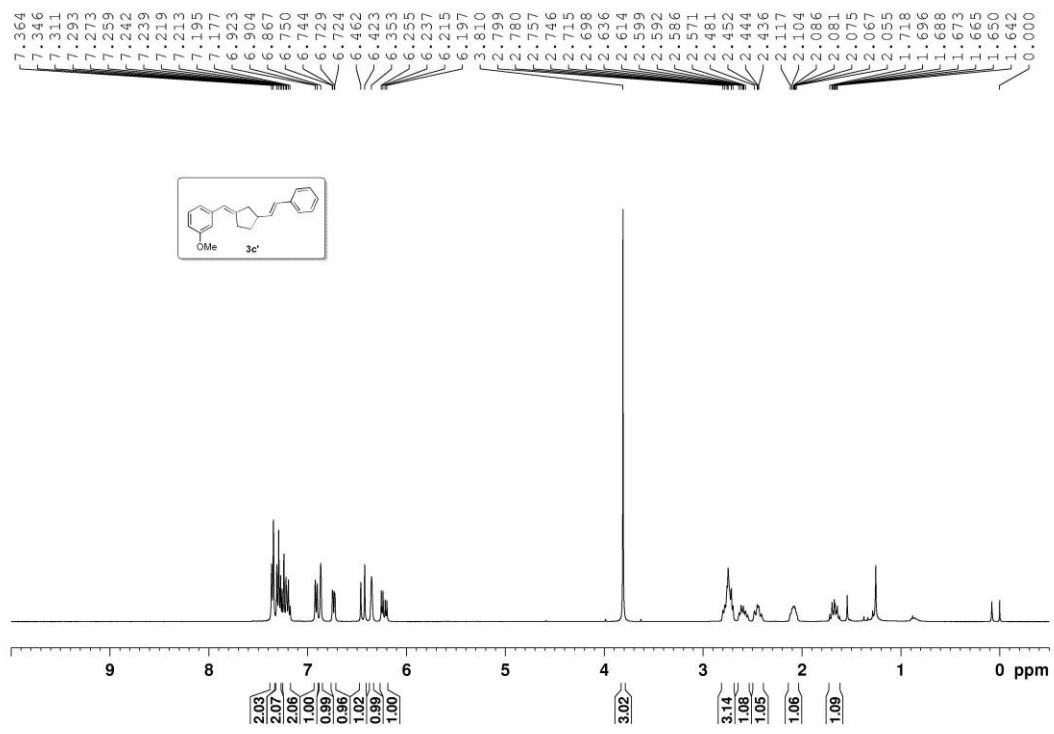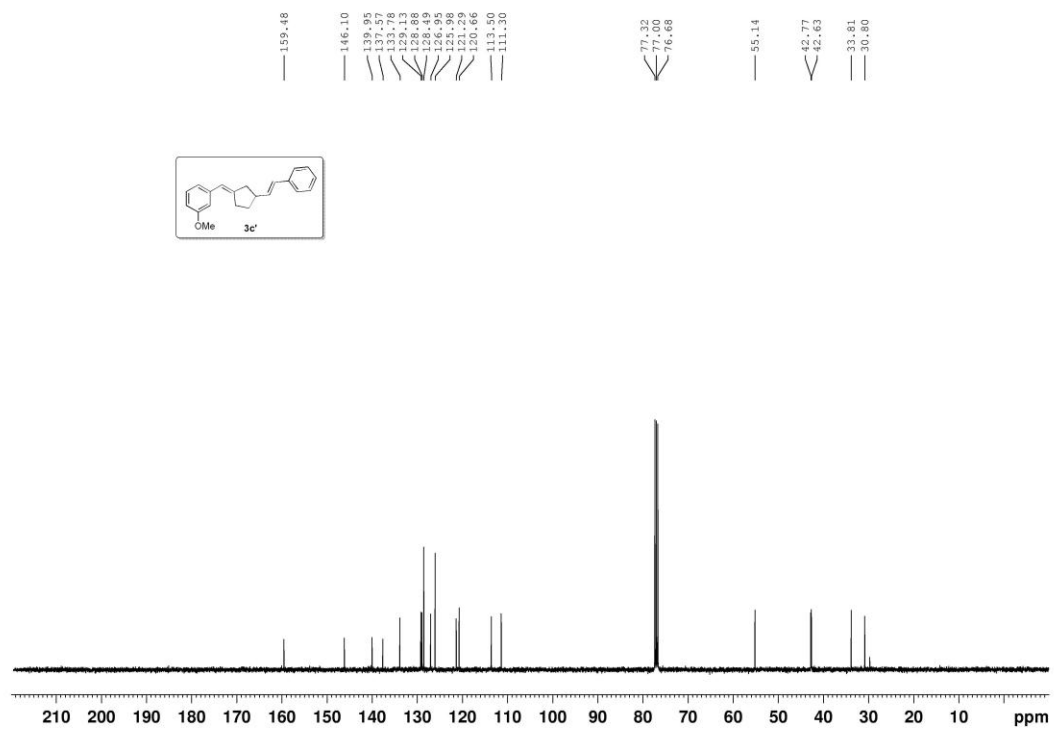

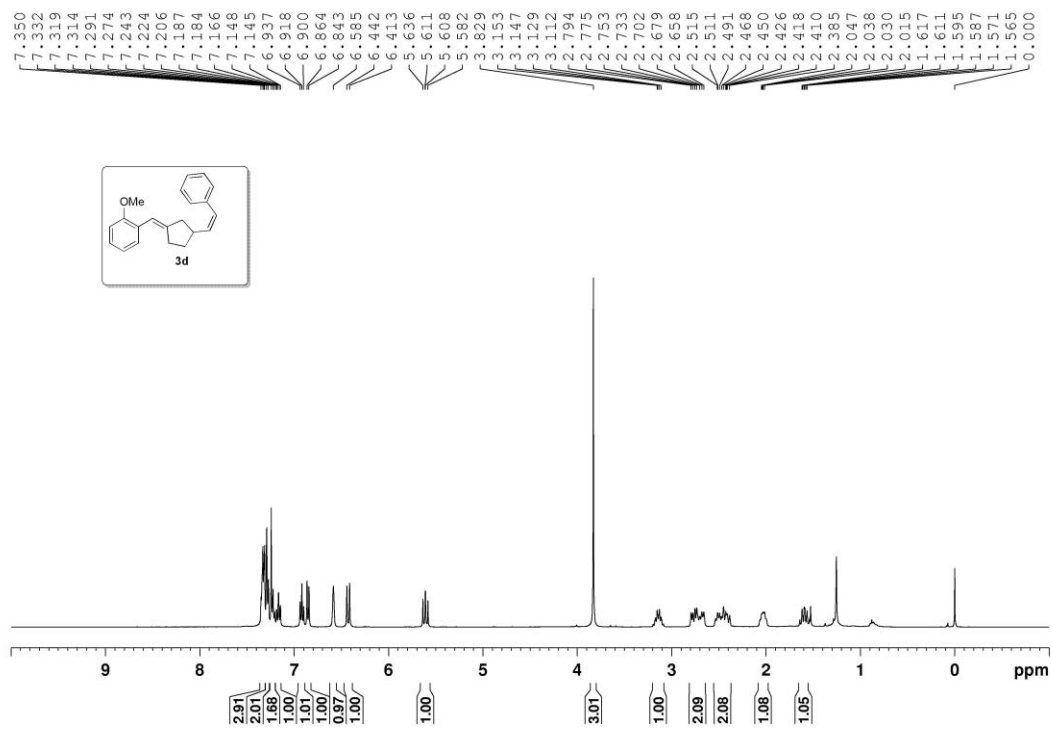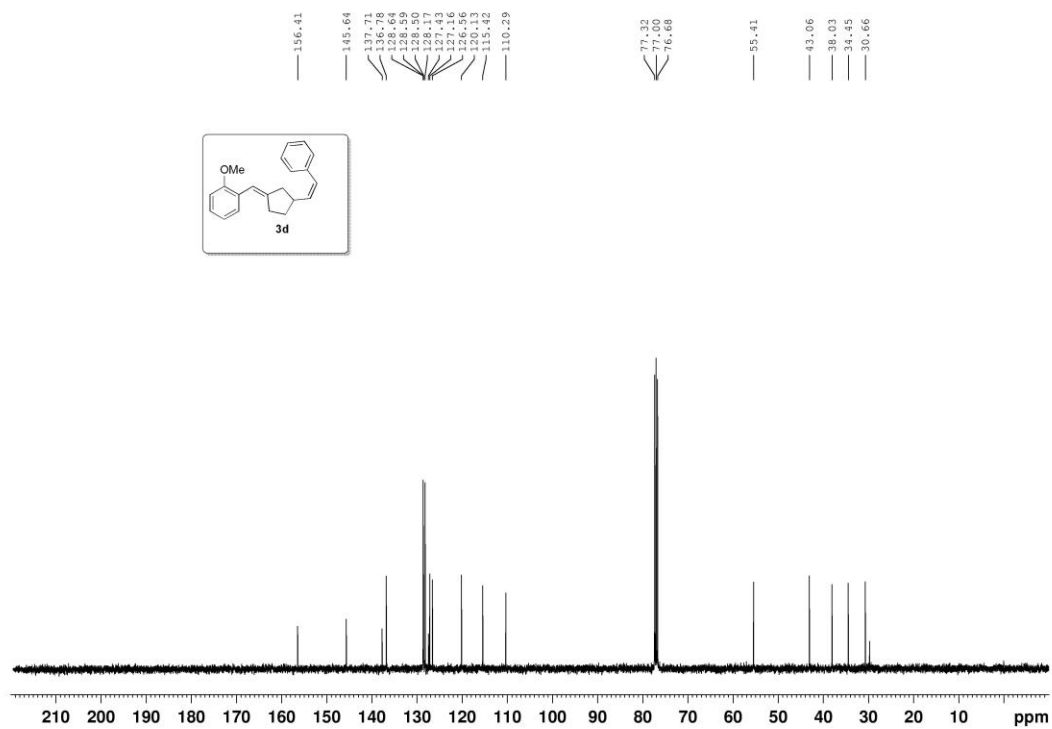

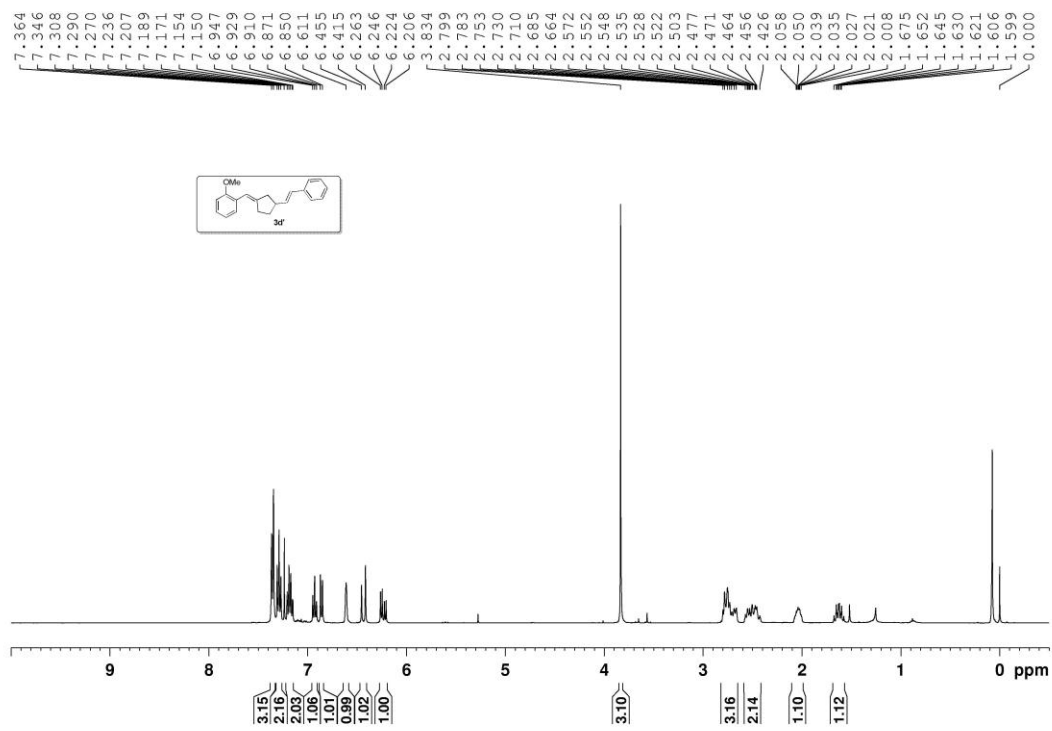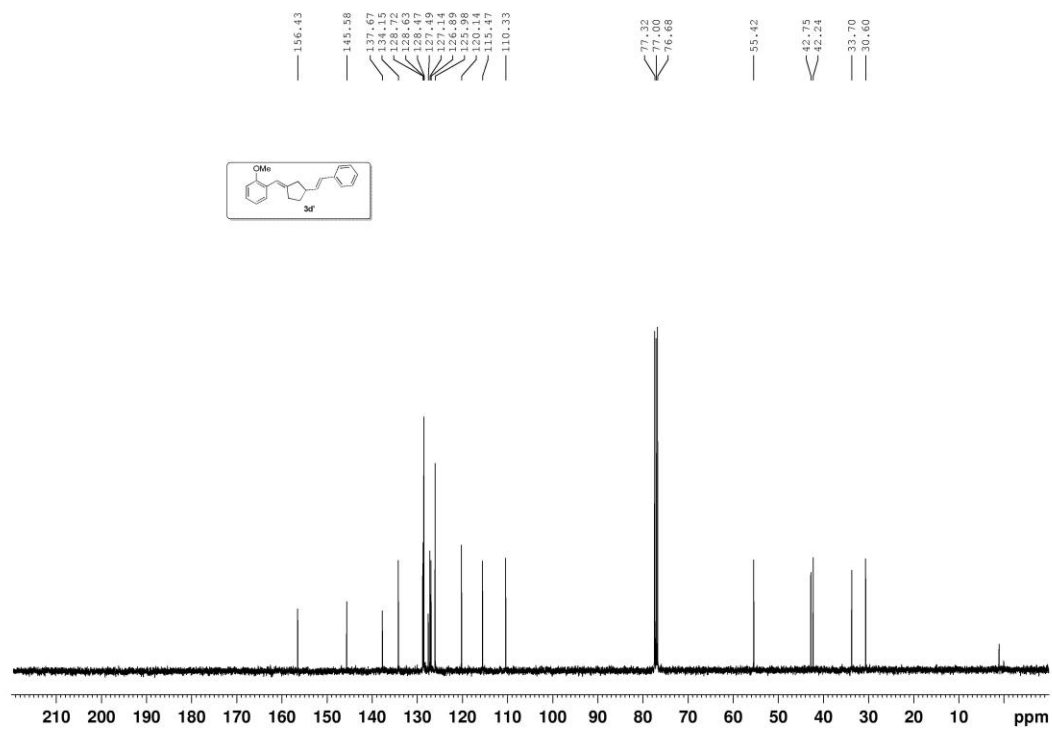



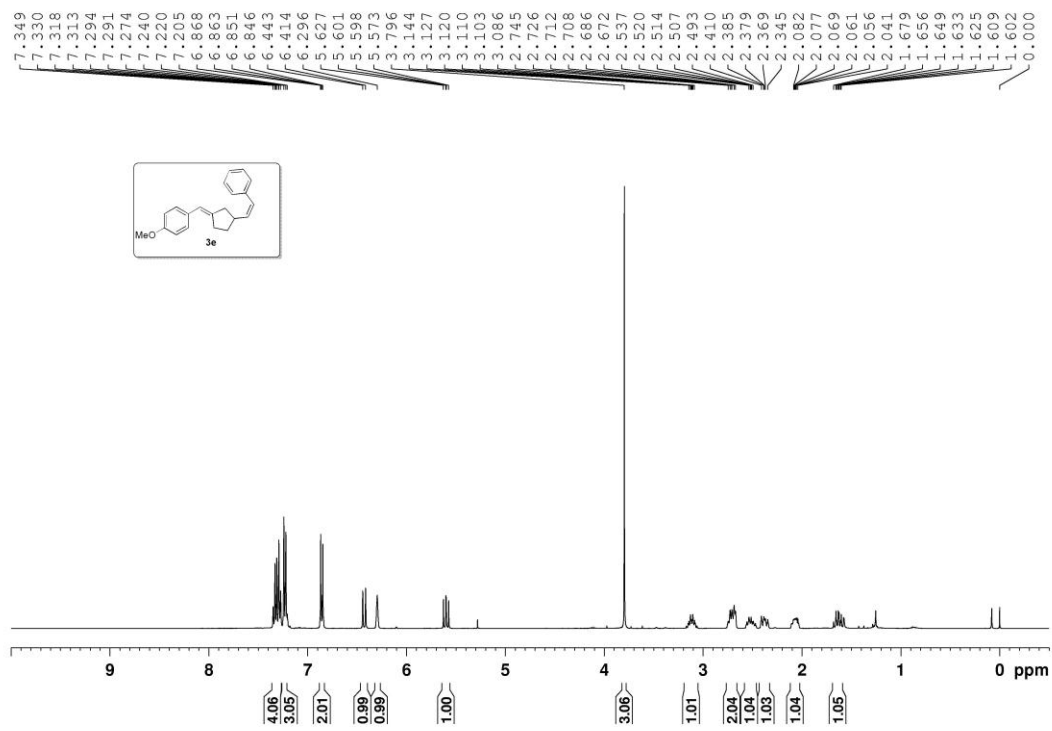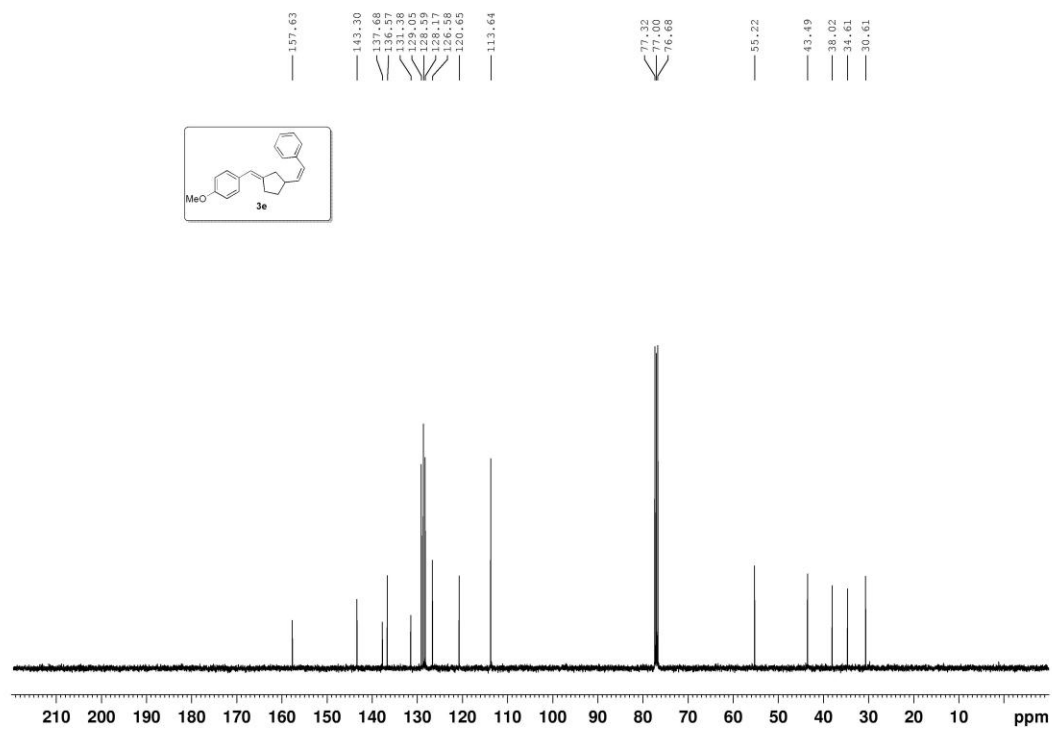

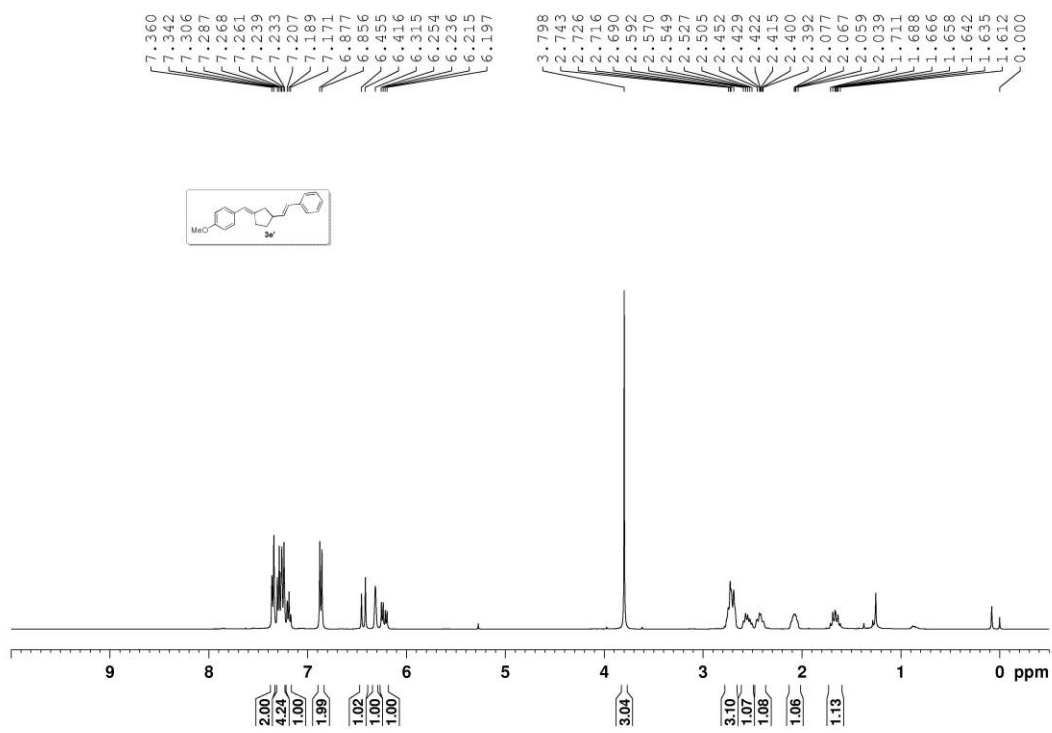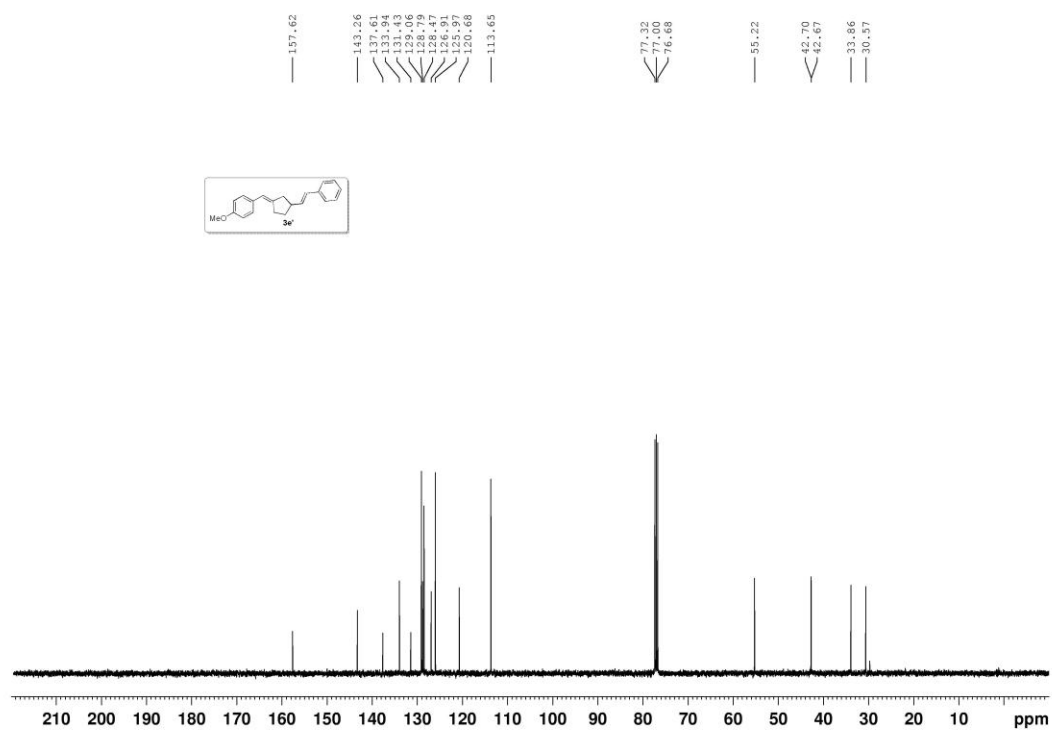

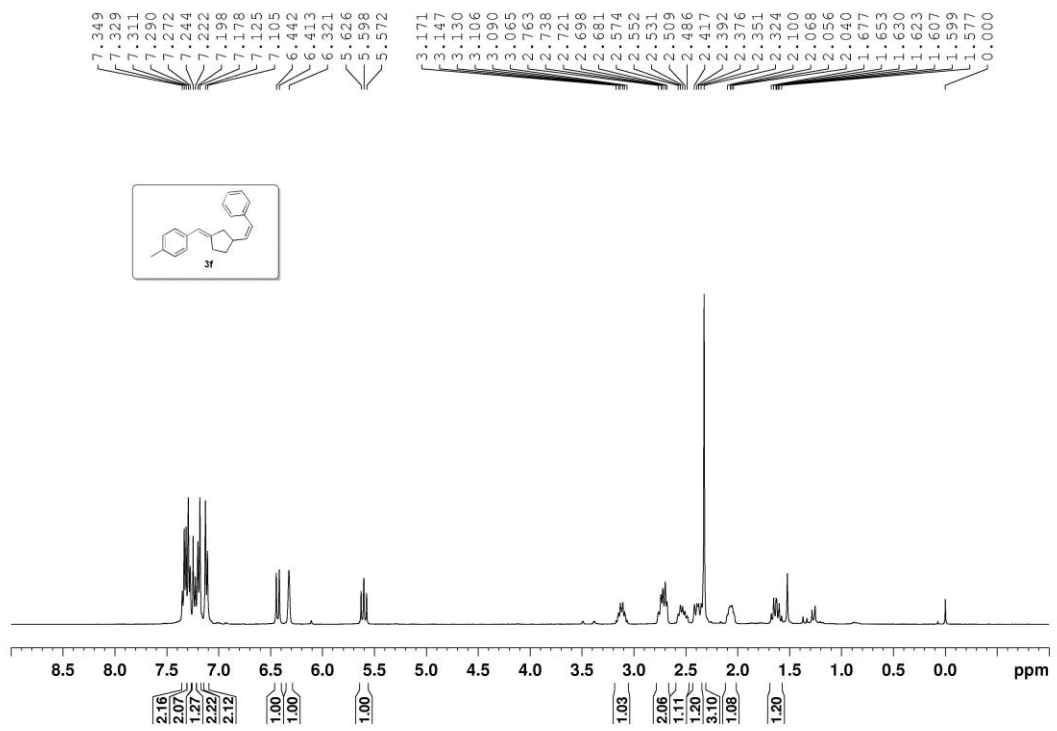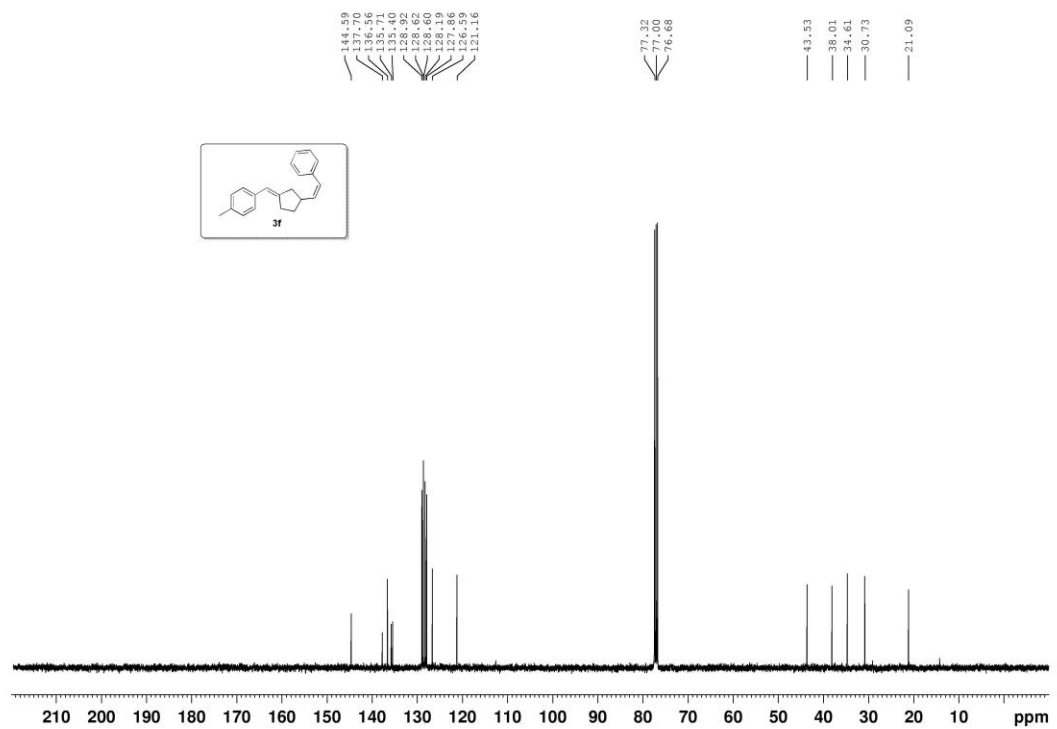

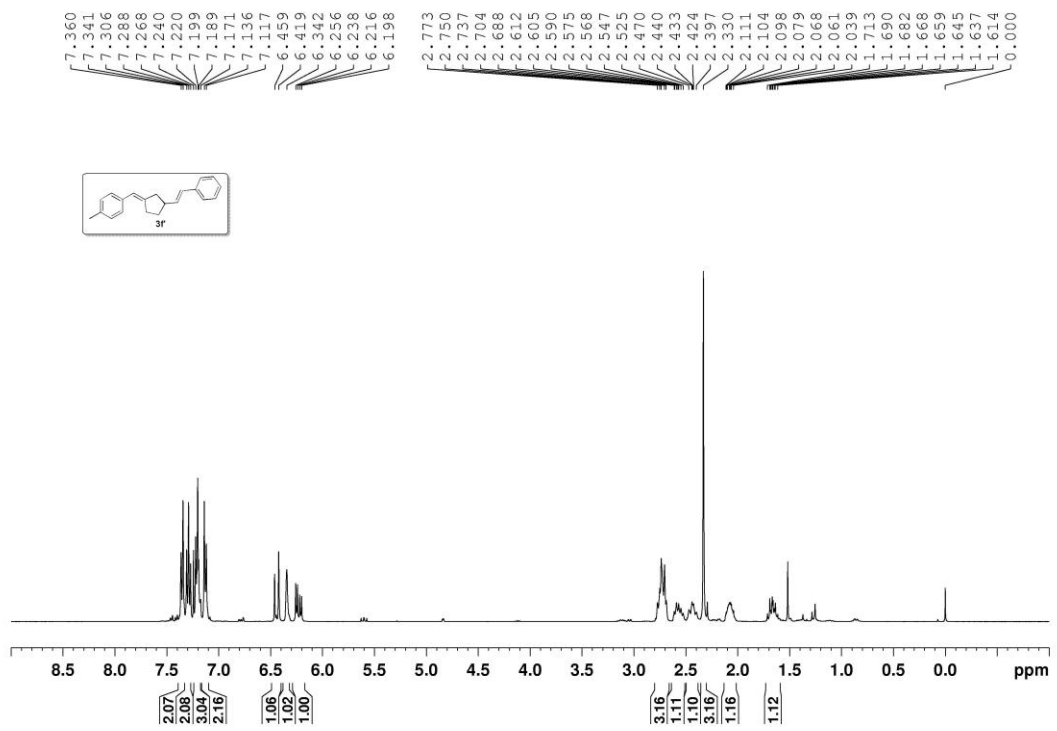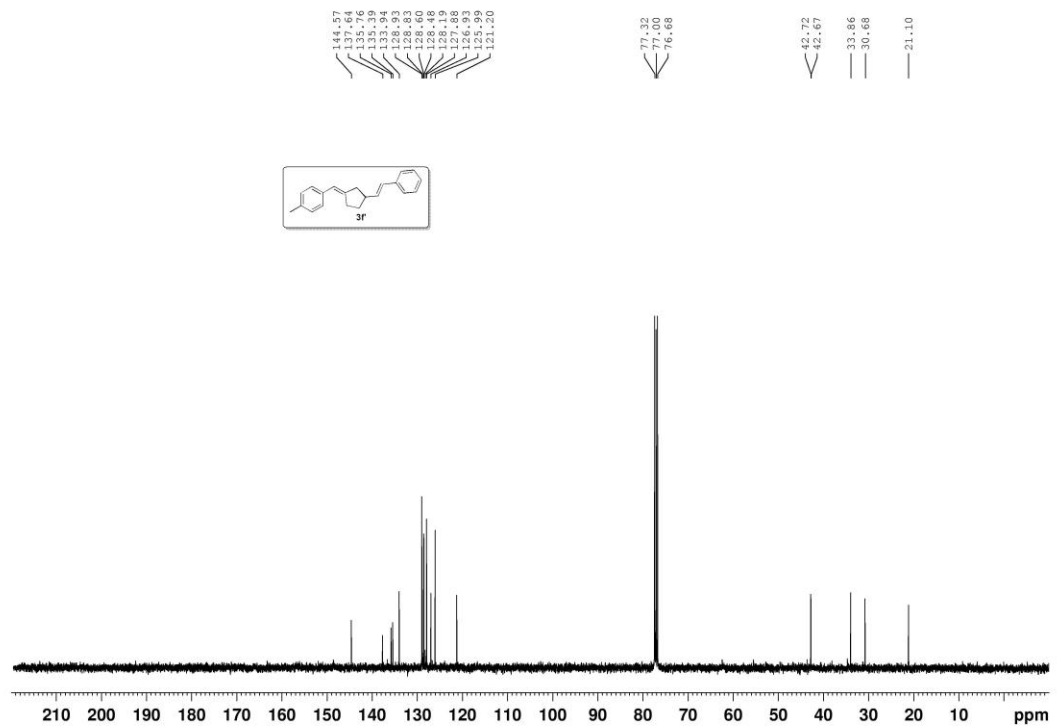

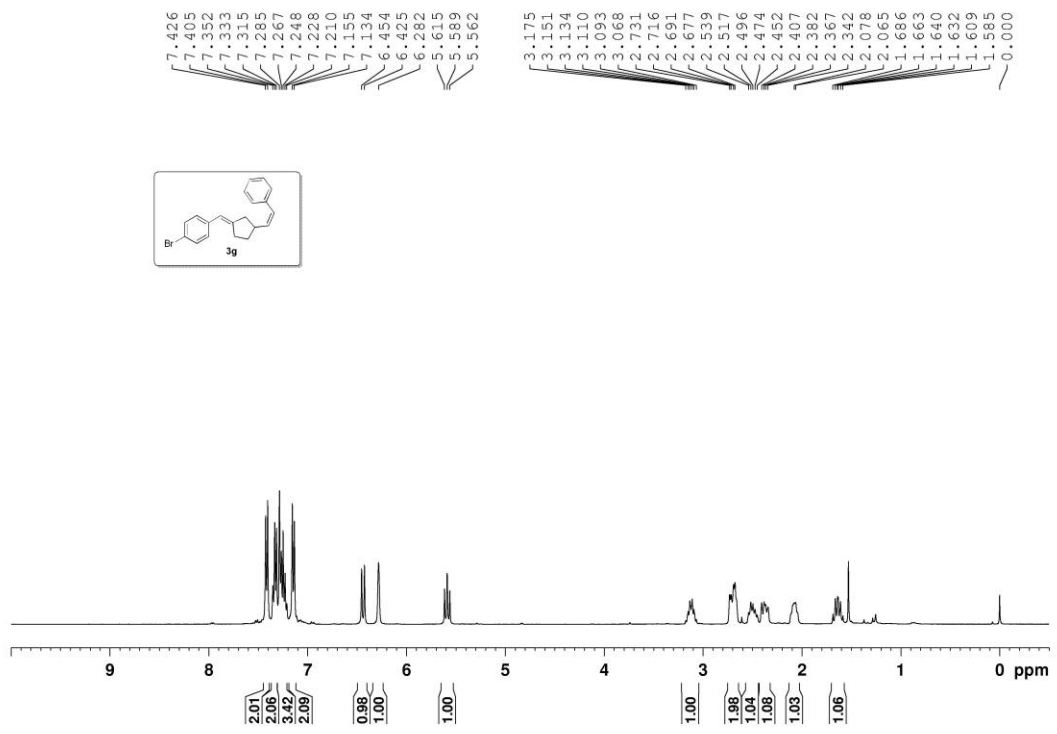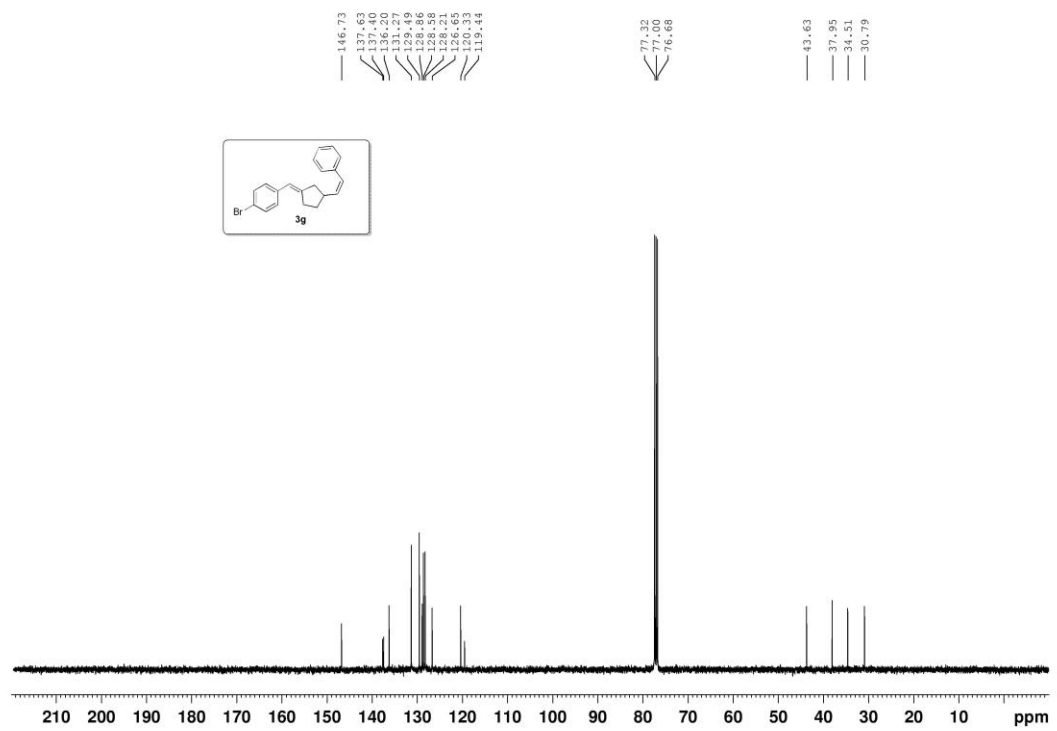

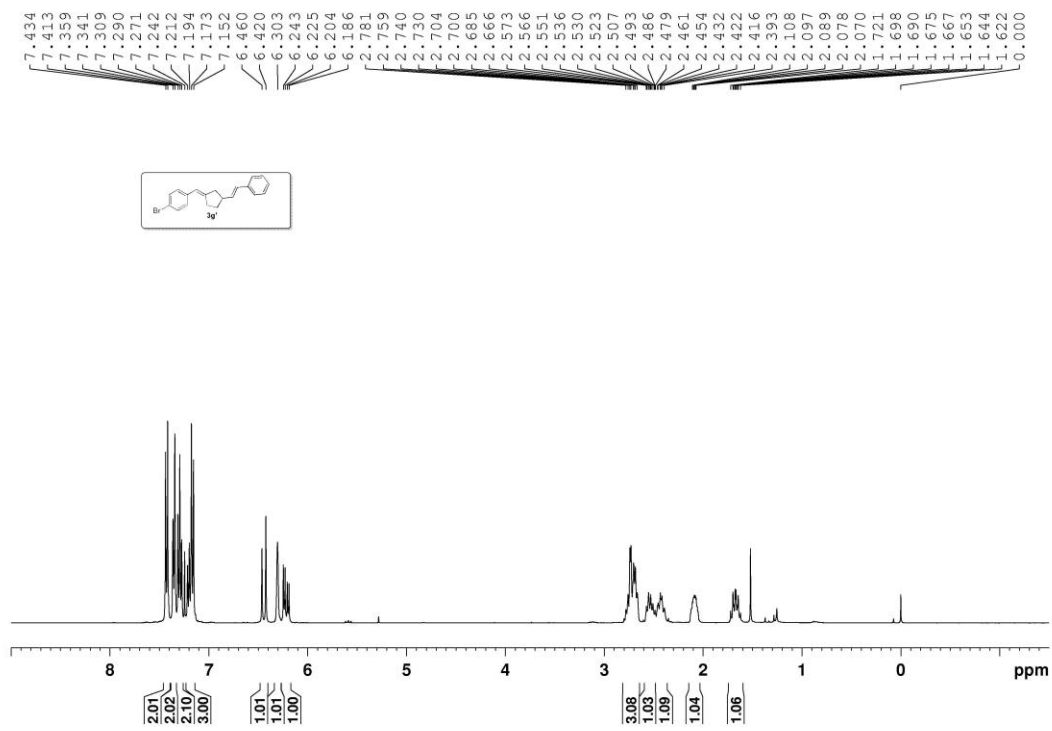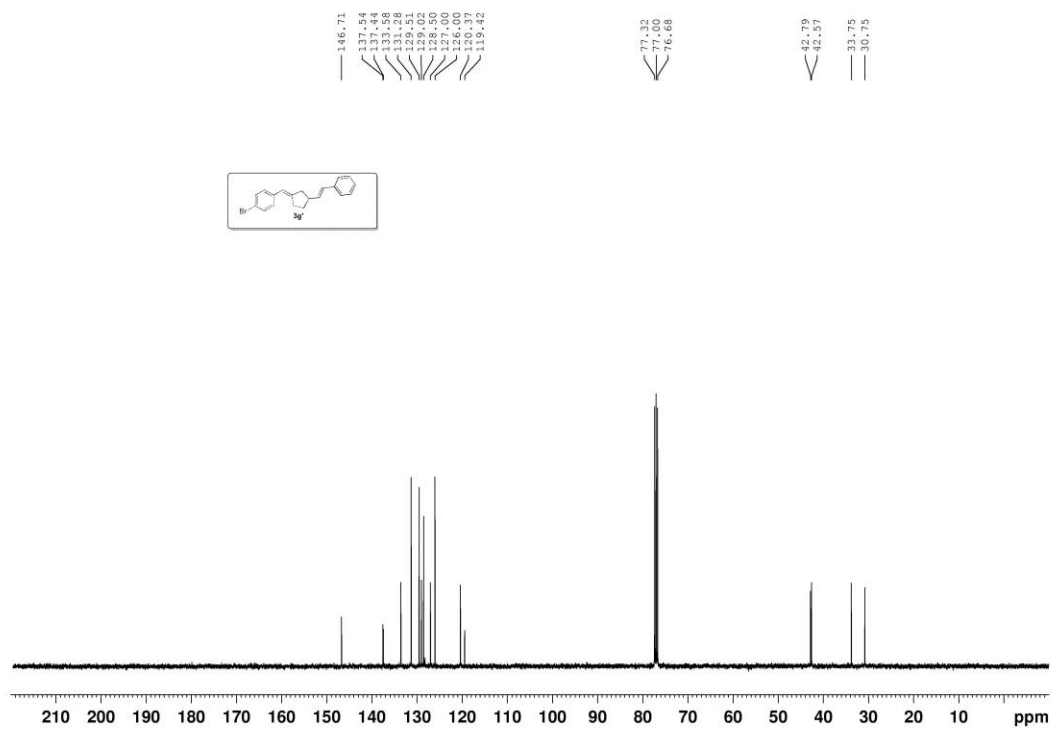

7.950  
7.931  
7.913  
7.884  
7.874  
7.868  
7.853  
7.847  
7.842  
7.826  
7.811  
7.190  
6.453  
6.424  
6.297  
5.615  
5.590  
5.587  
5.561  
5.150  
3.133  
3.126  
3.116  
3.109  
3.092  
3.085  
2.725  
2.720  
2.695  
2.680  
2.668  
2.546  
2.523  
2.508  
2.502  
2.495  
2.479  
2.415  
2.390  
2.382  
2.374  
2.350  
2.092  
2.088  
2.084  
2.077  
2.061  
2.049  
2.045  
2.039  
1.685  
1.661  
1.654  
1.639  
1.630  
1.615  
1.607  
0.000

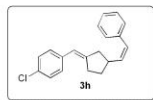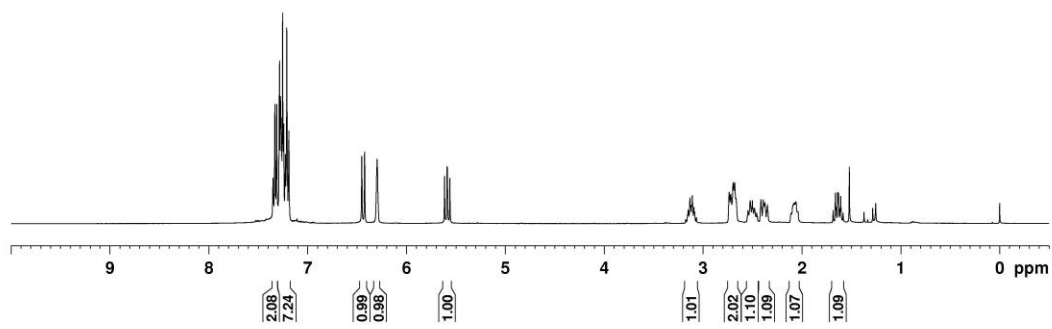

146.50  
137.63  
136.52  
136.22  
131.33  
129.84  
129.54  
128.98  
128.32  
127.29  
126.26  
120.38

77.32  
76.98

43.60  
37.95  
34.51  
30.76

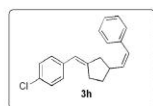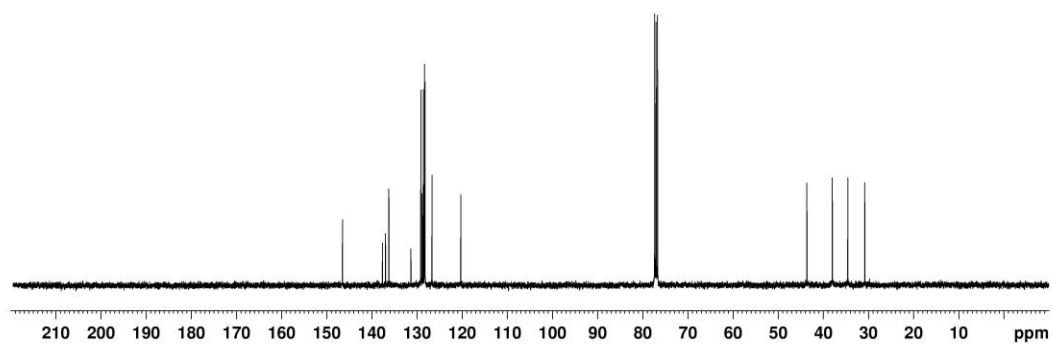

7.562  
7.343  
7.311  
7.292  
7.288  
7.272  
7.266  
7.247  
7.235  
7.214  
7.196  
7.178  
6.462  
6.423  
6.323  
6.247  
6.229  
6.208  
6.190  
2.785  
2.762  
2.746  
2.738  
2.713  
2.709  
2.696  
2.679  
2.586  
2.580  
2.564  
2.549  
2.543  
2.537  
2.521  
2.506  
2.499  
2.473  
2.467  
2.445  
2.435  
2.428  
2.406  
2.399  
2.123  
2.111  
2.093  
2.081  
2.074  
1.725  
1.702  
1.694  
1.680  
1.671  
1.657  
1.649  
1.626  
0.000

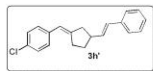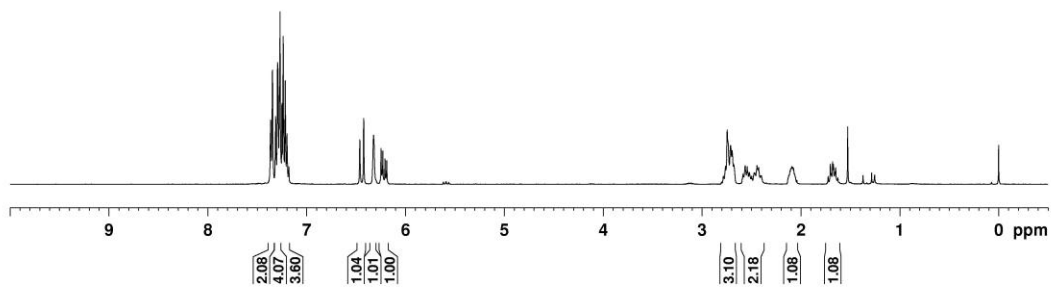

146.49  
137.56  
137.52  
133.63  
131.33  
129.16  
128.51  
128.34  
127.00  
126.96  
120.33

77.32  
76.59

42.77  
42.59  
32.77  
30.73

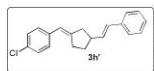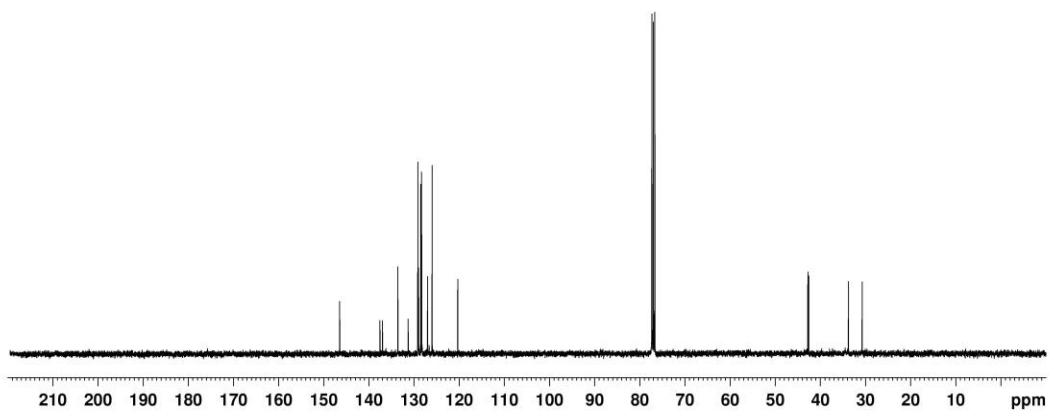



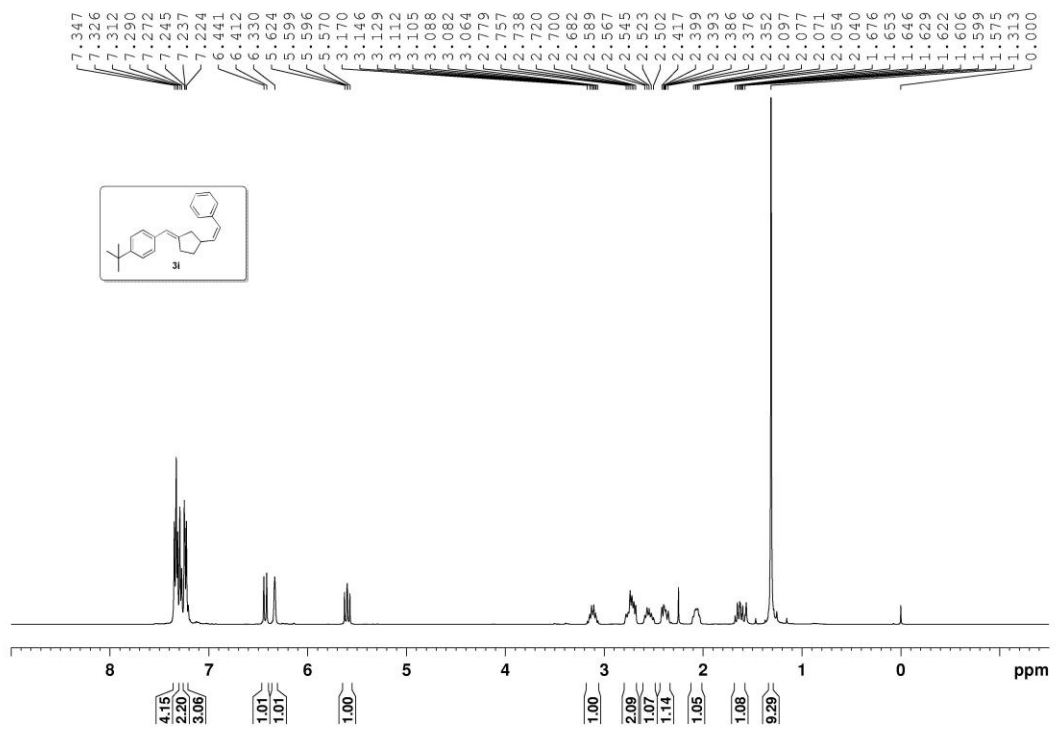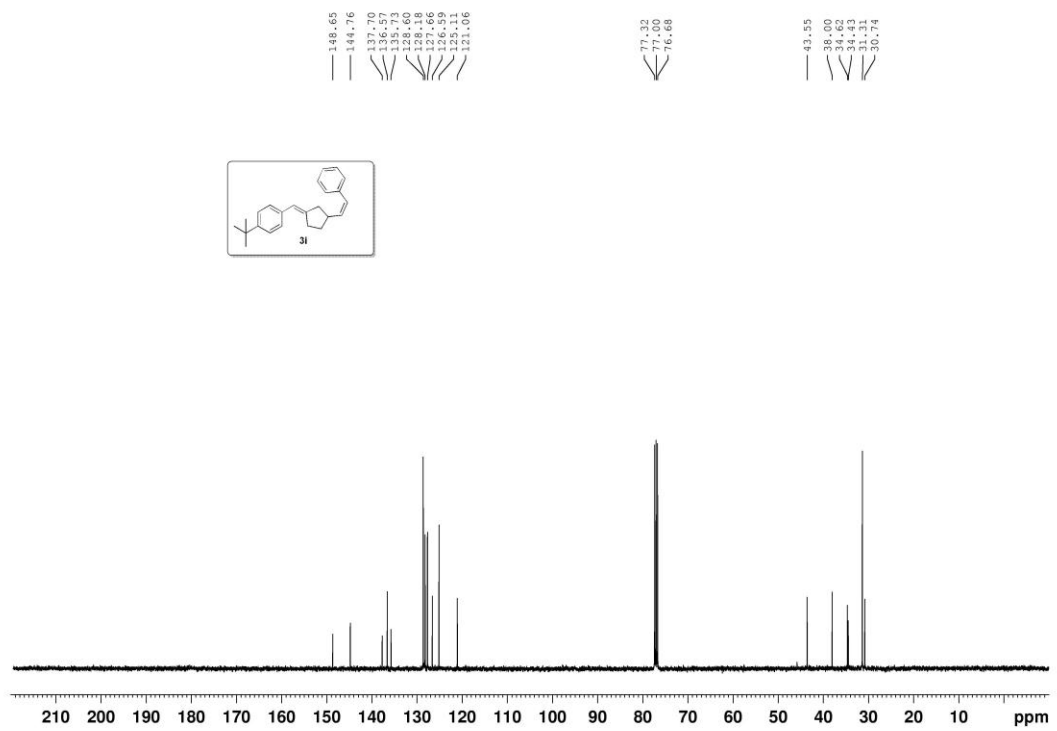

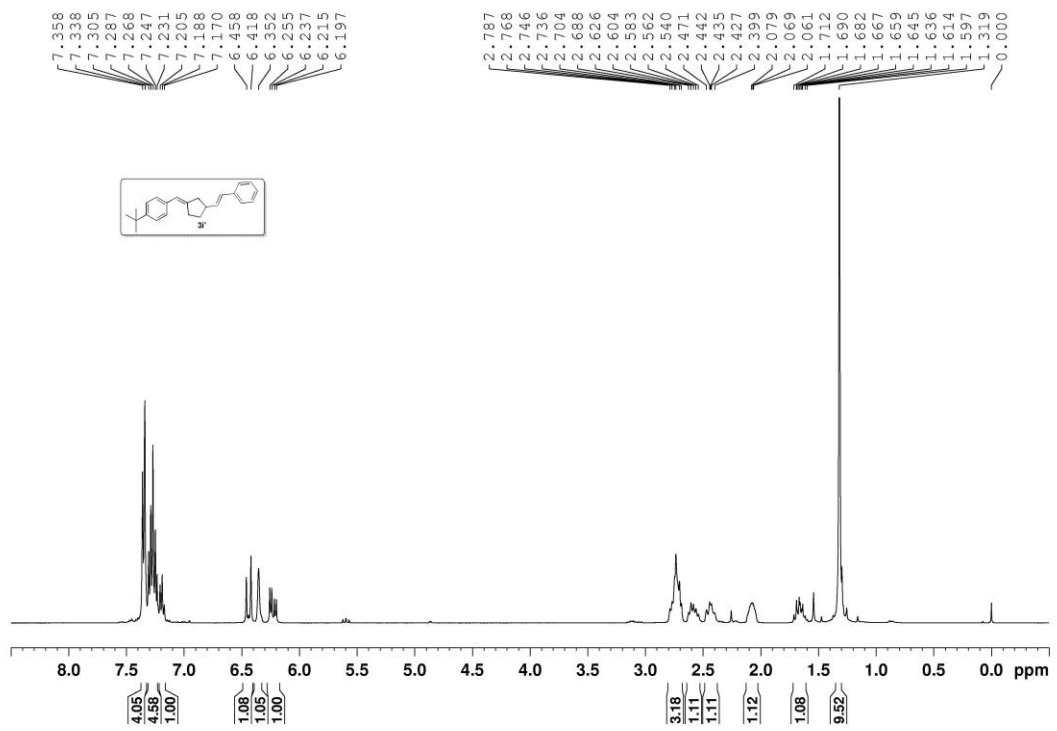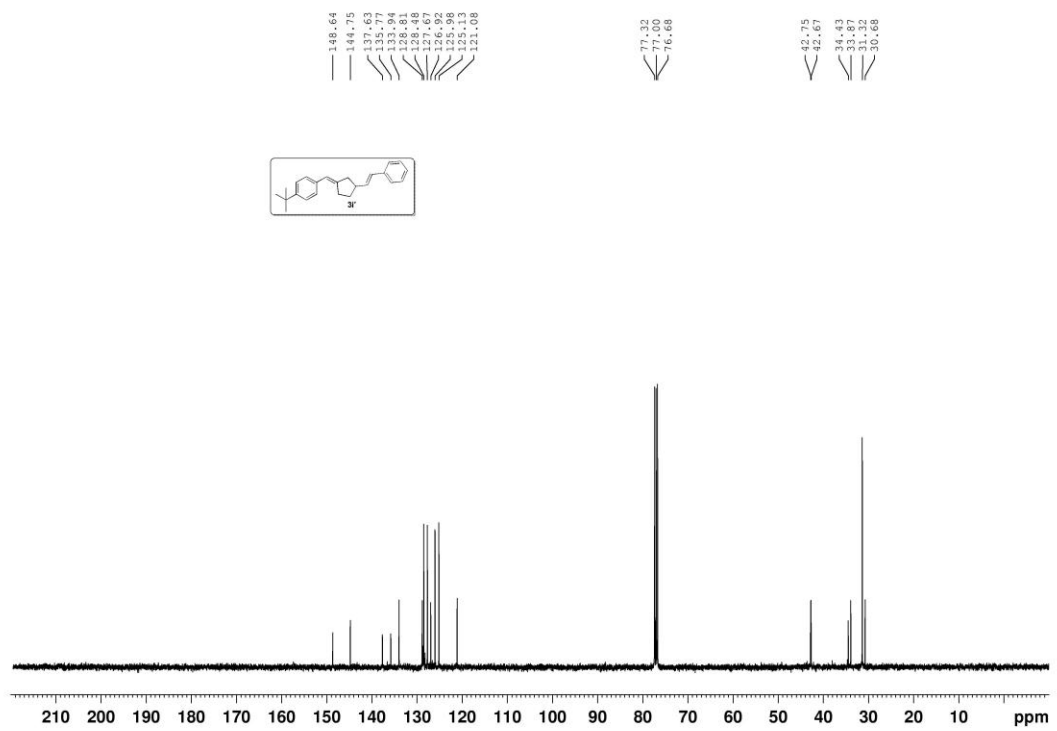

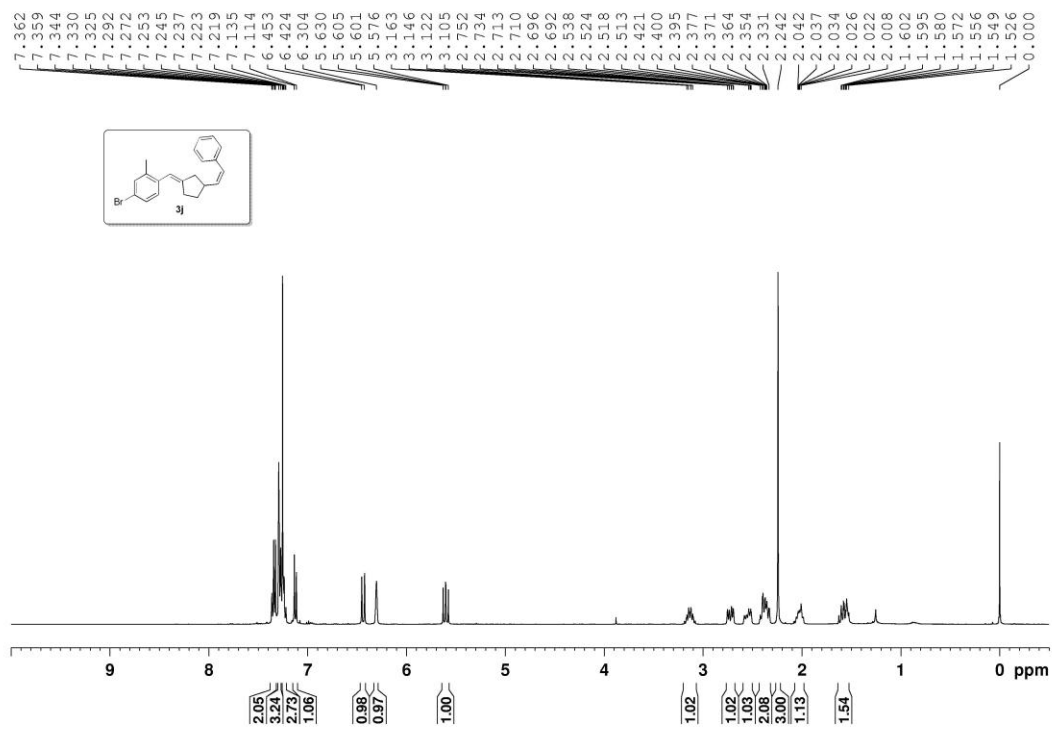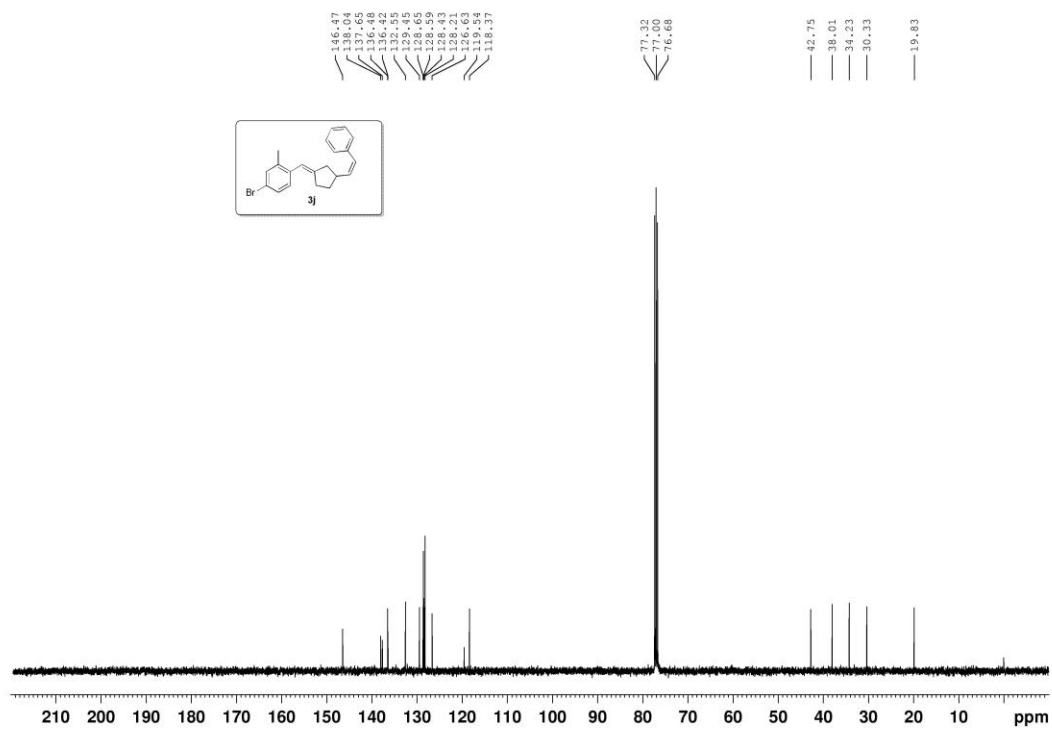

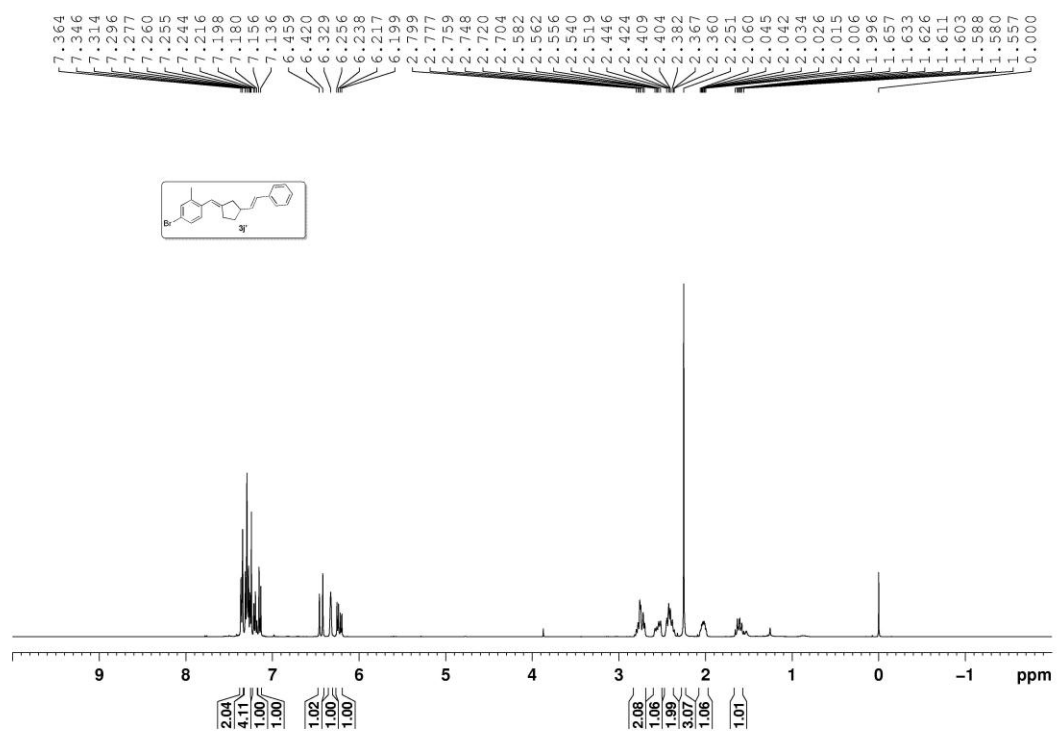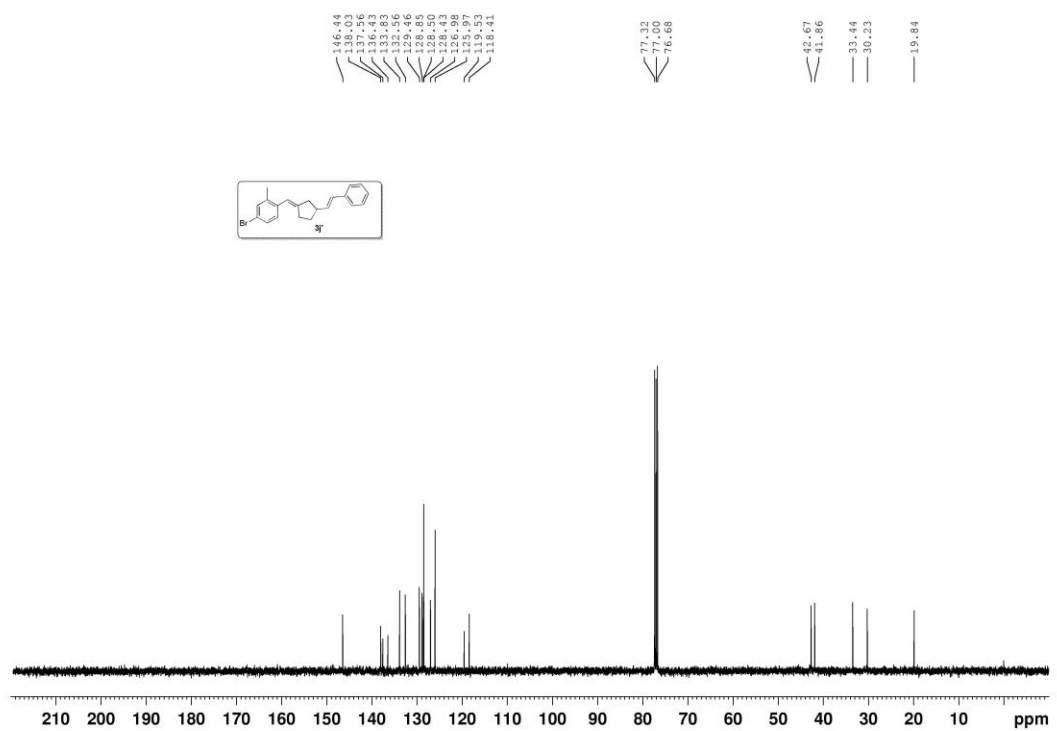

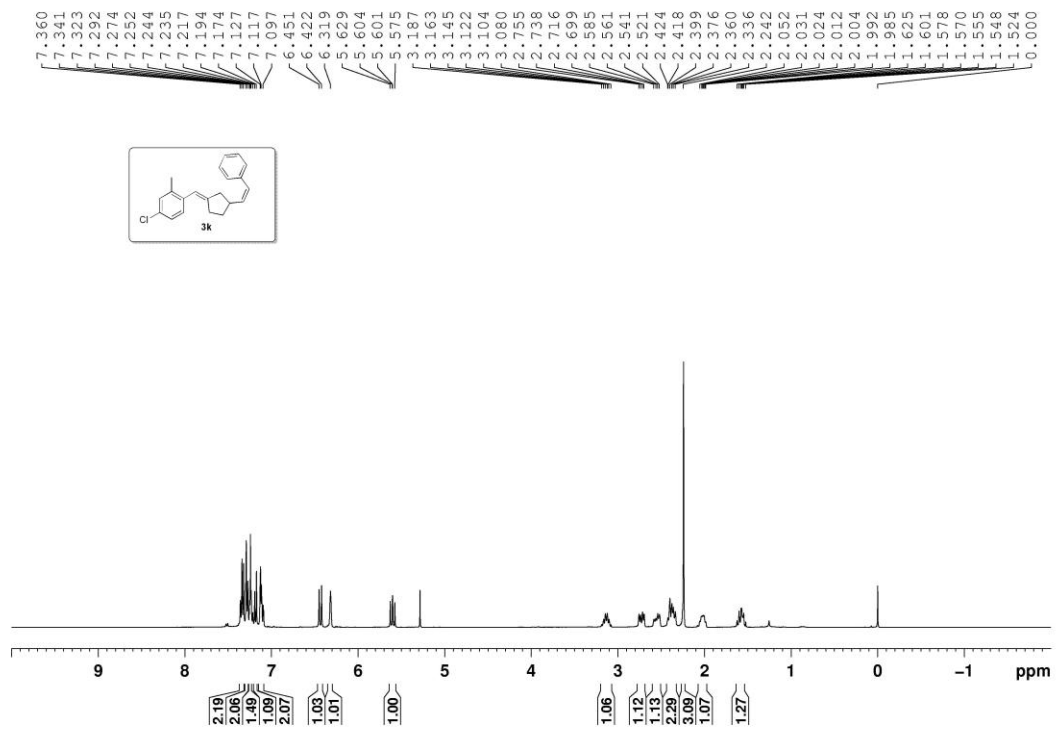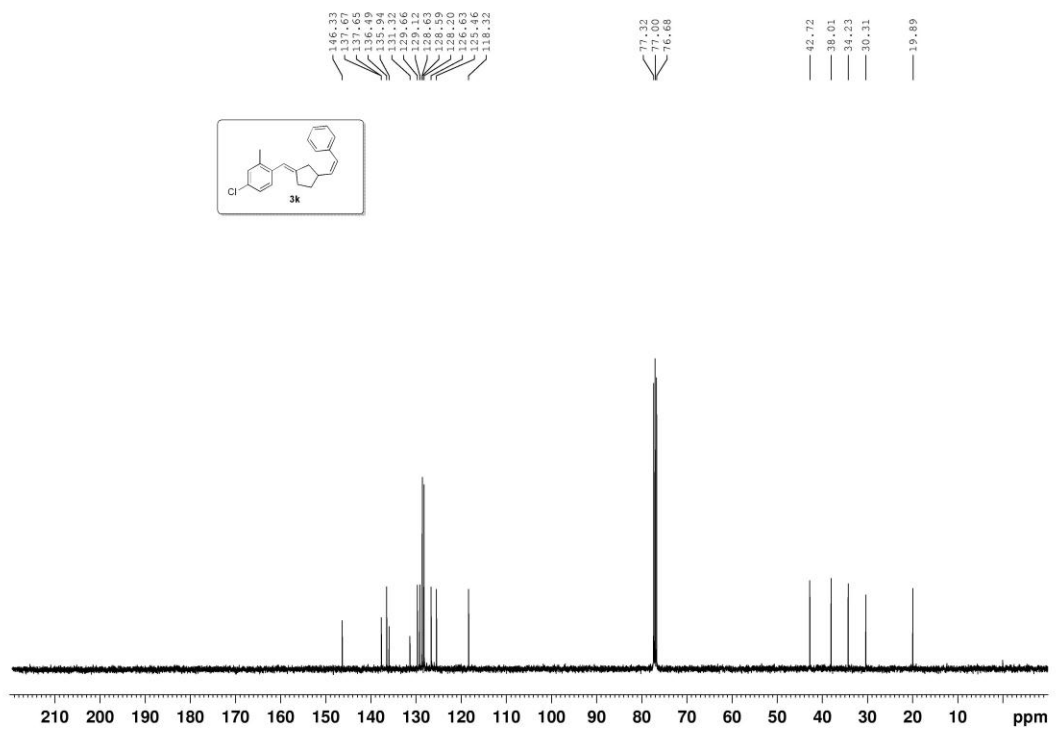

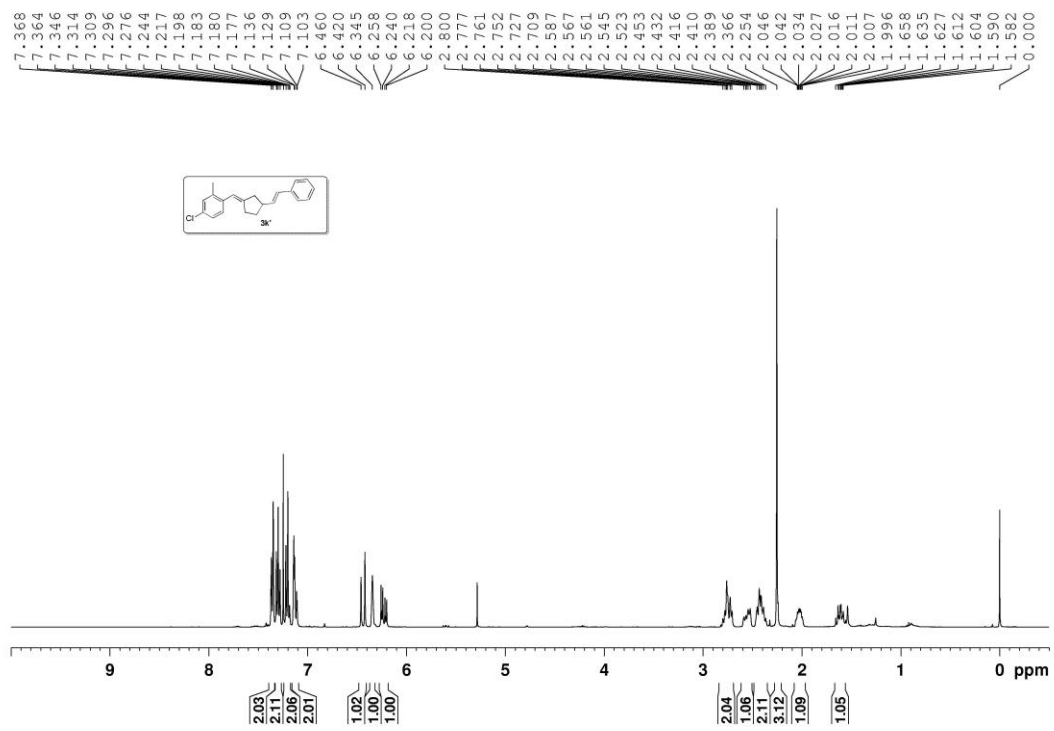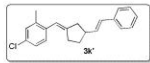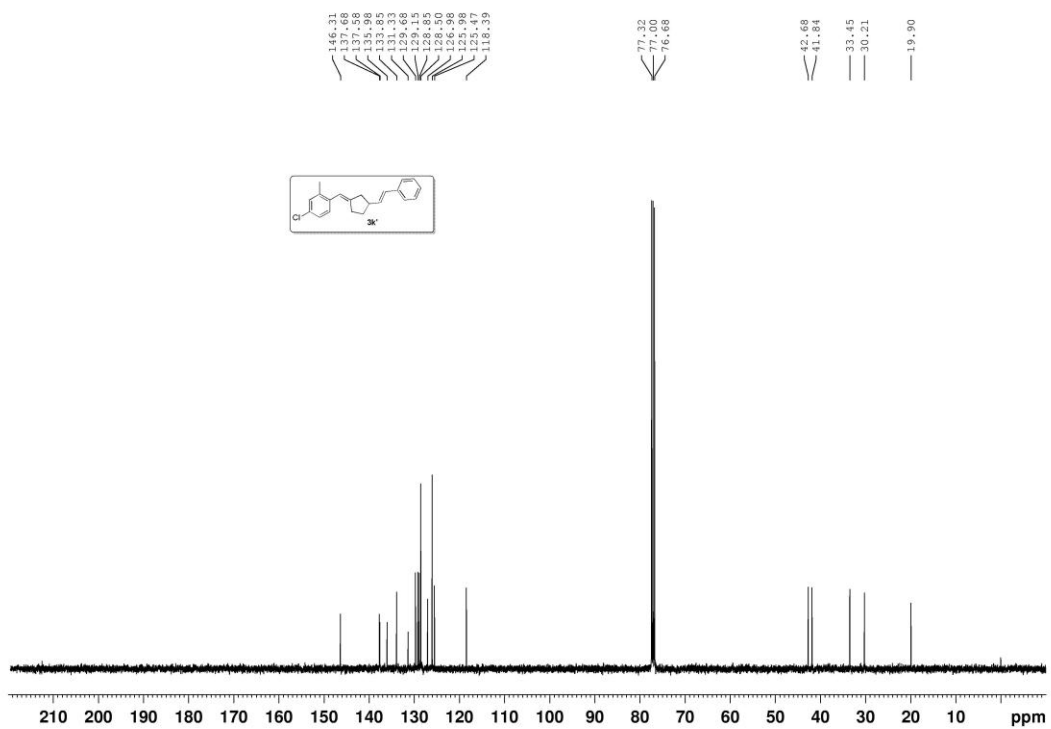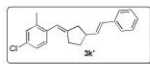

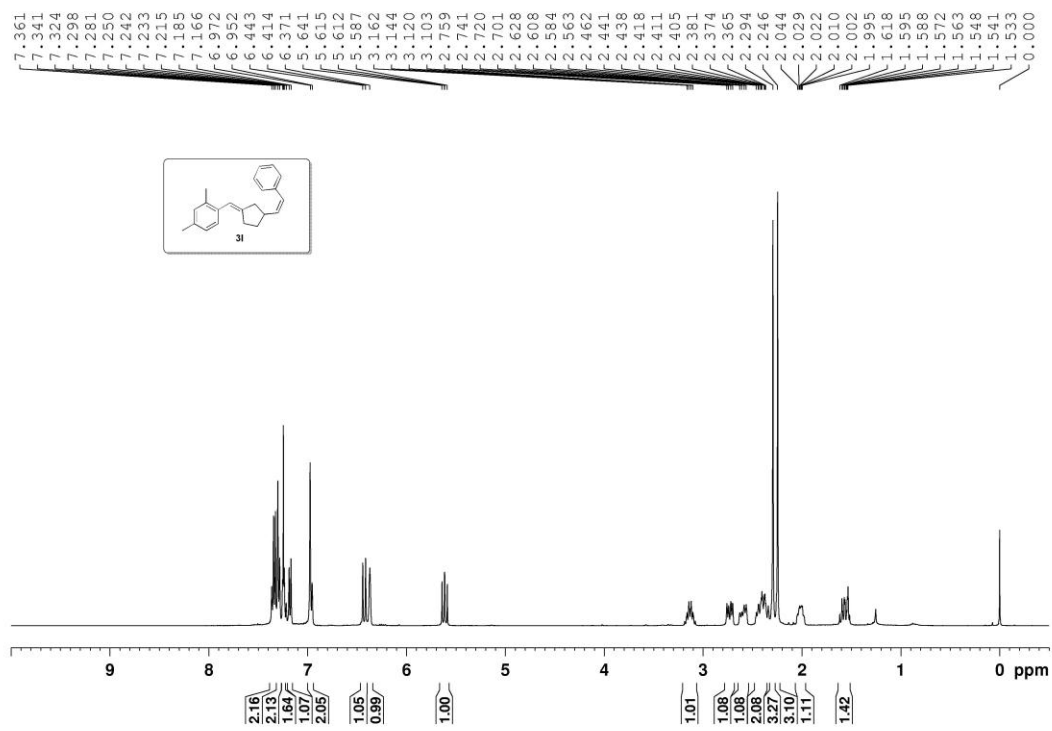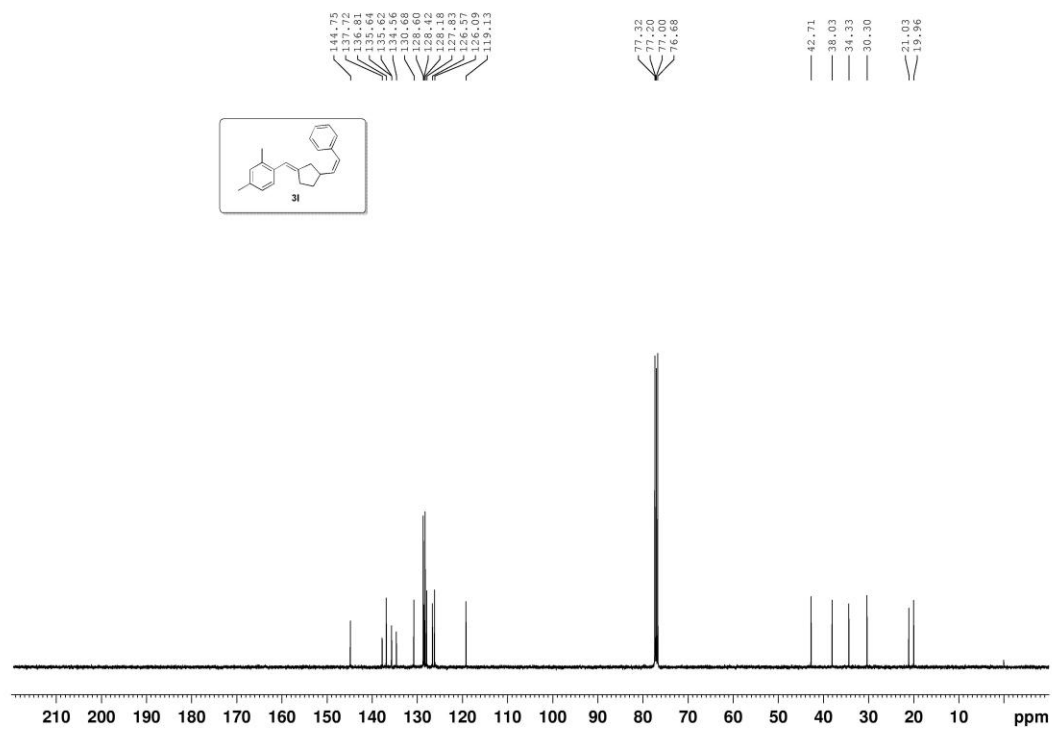

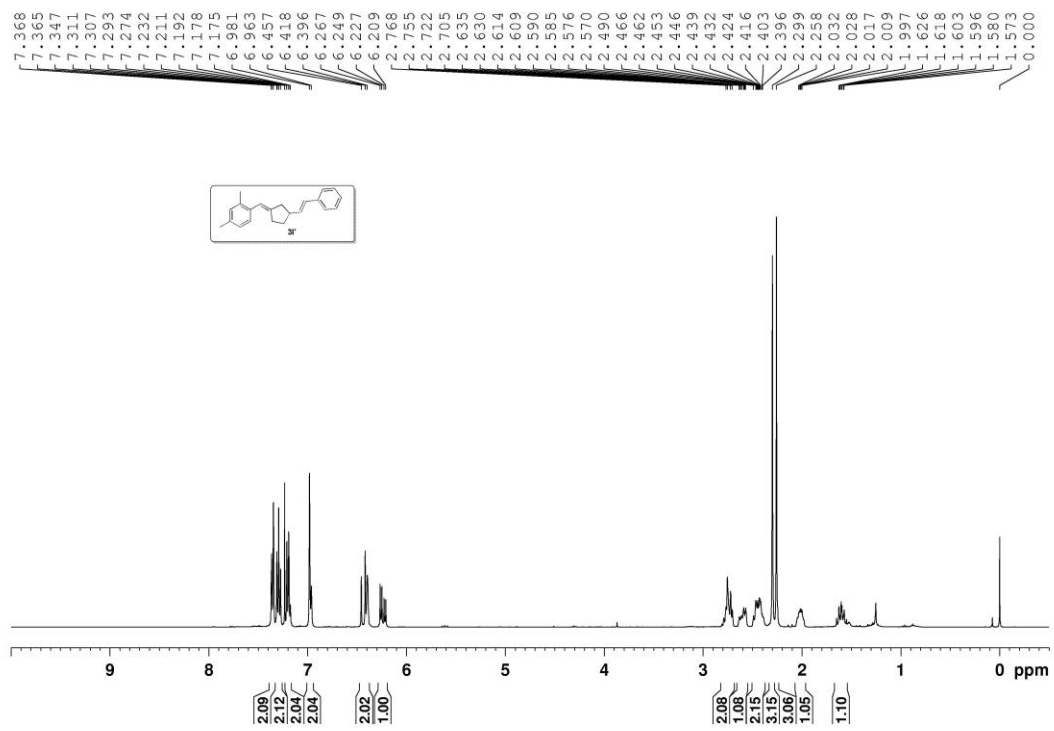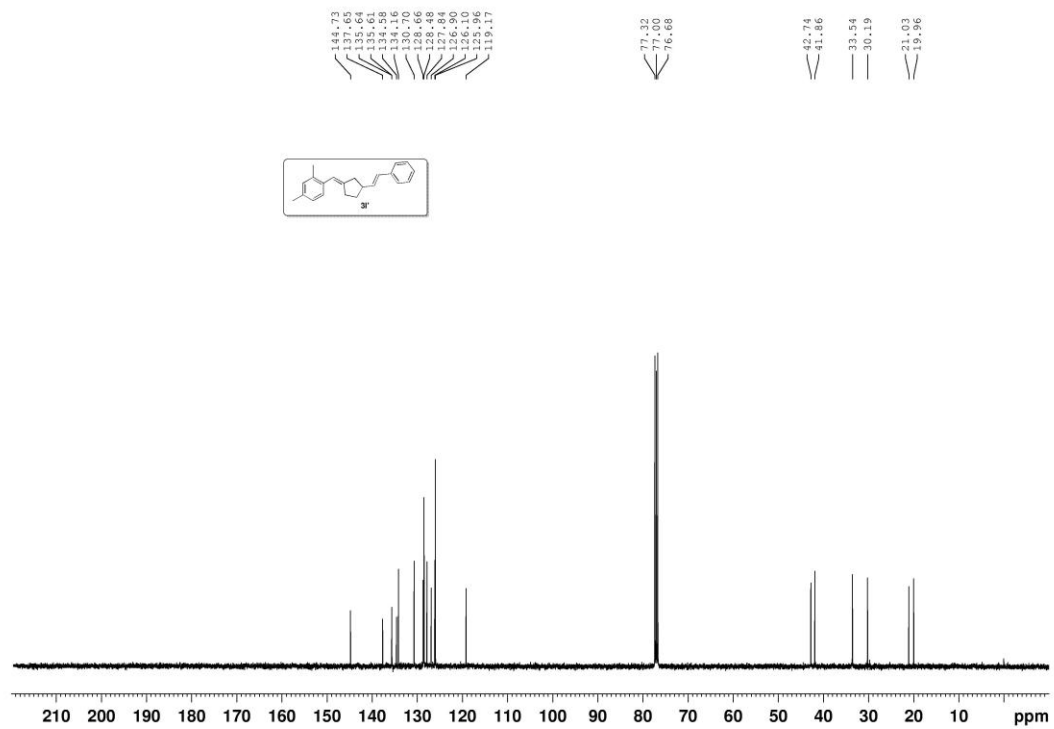



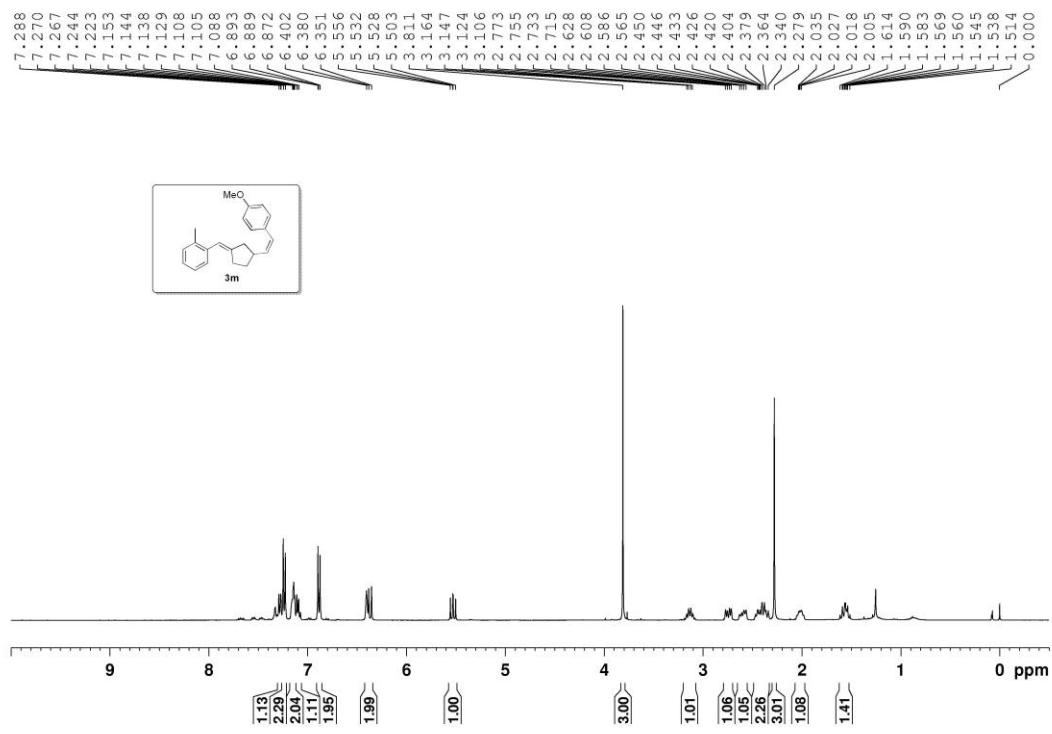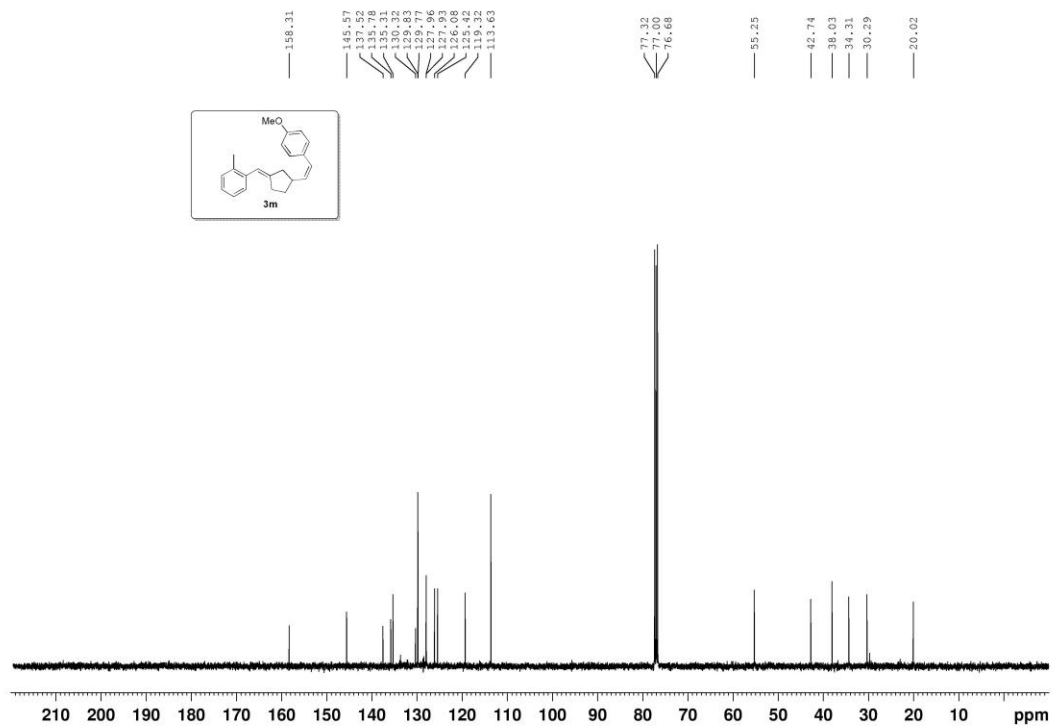

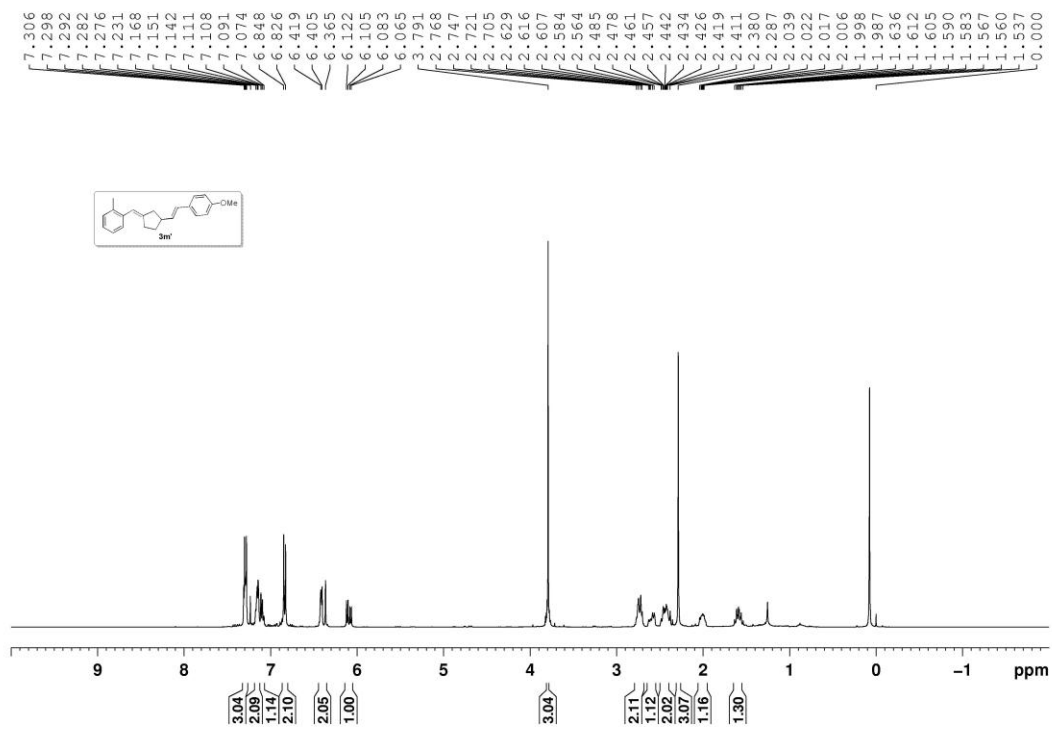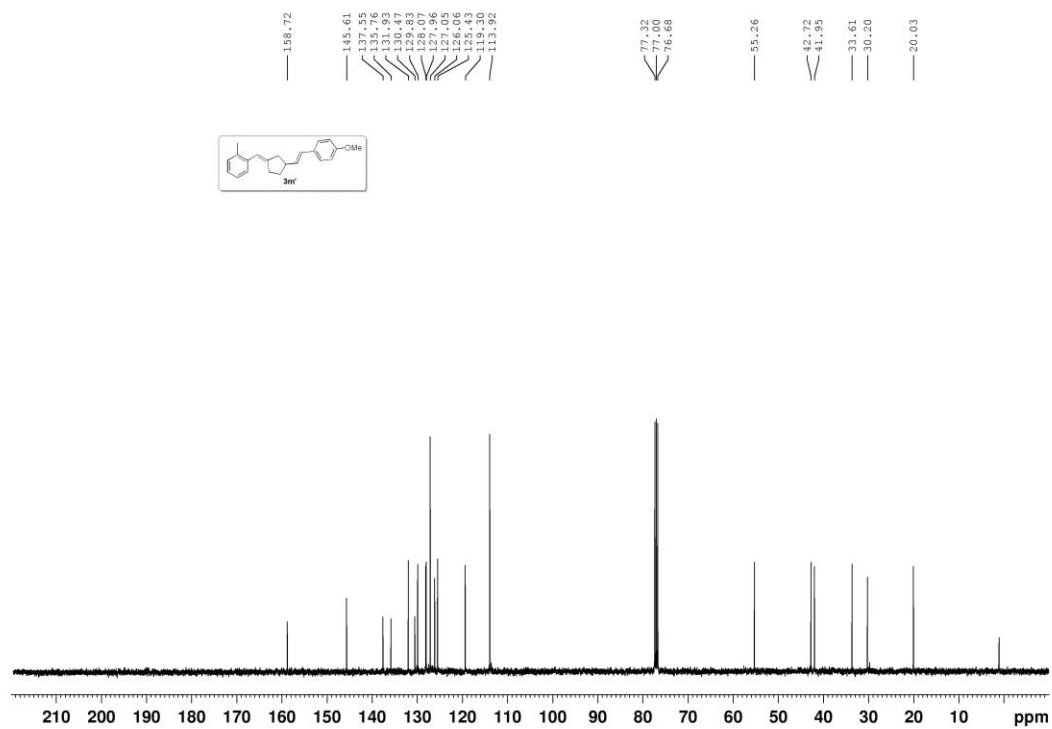

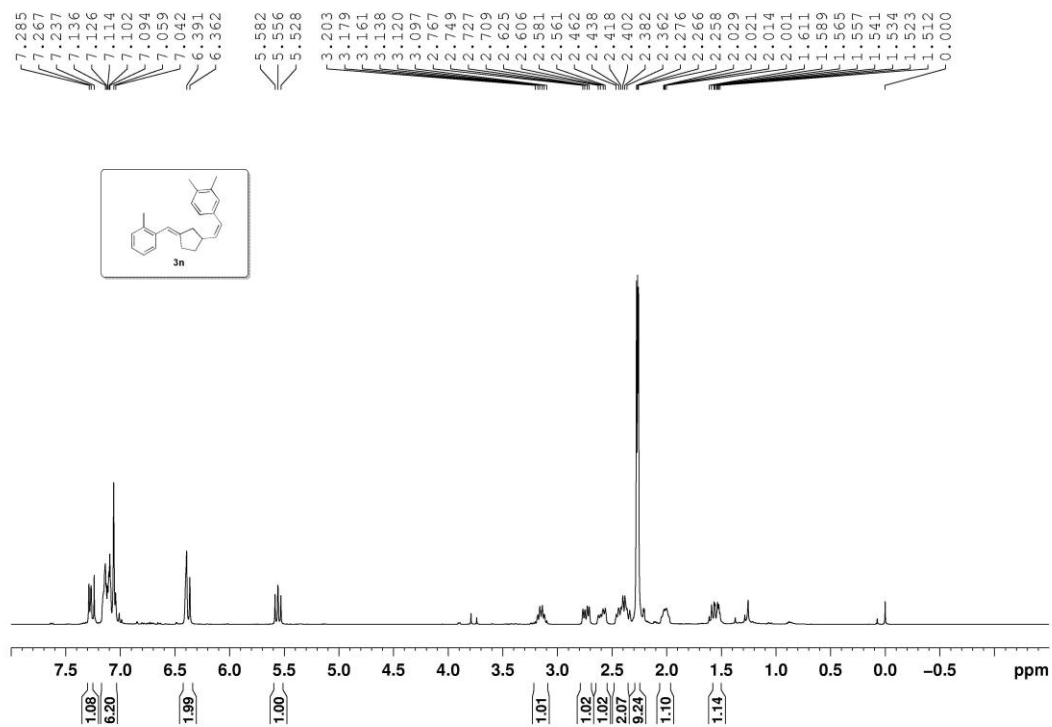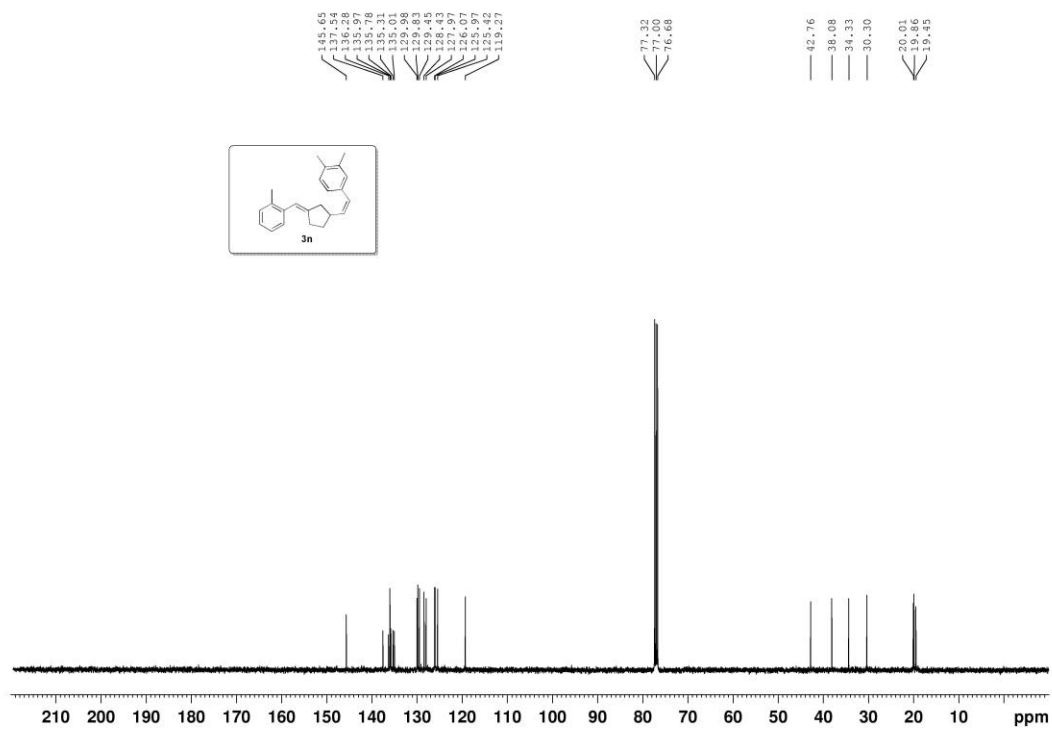

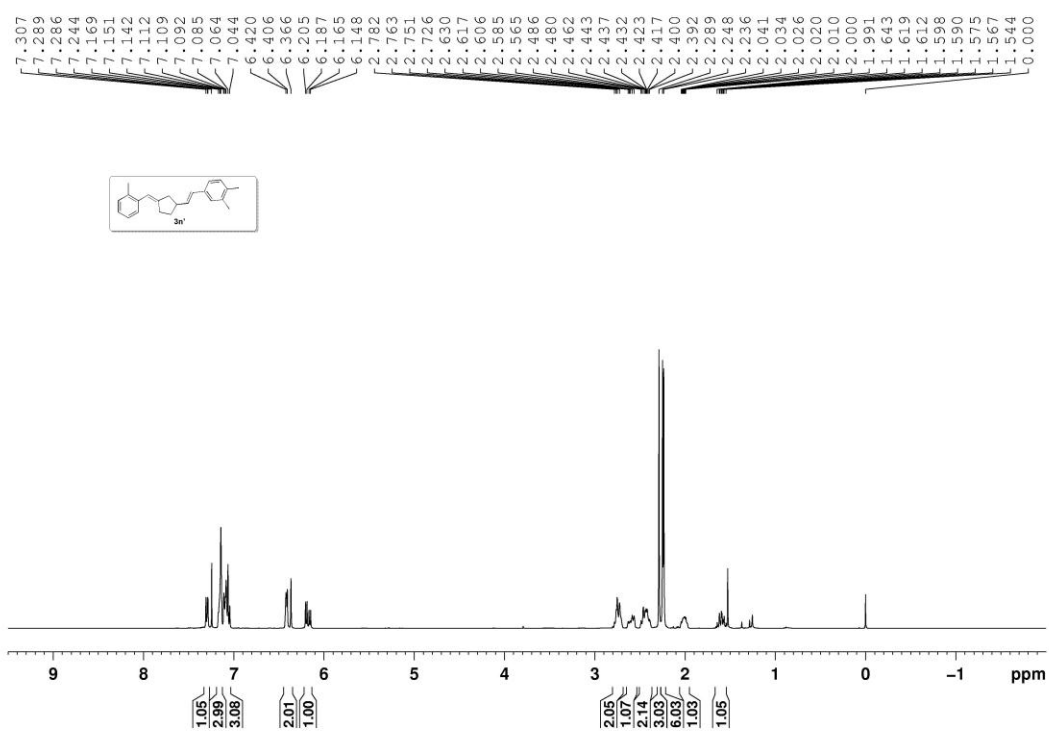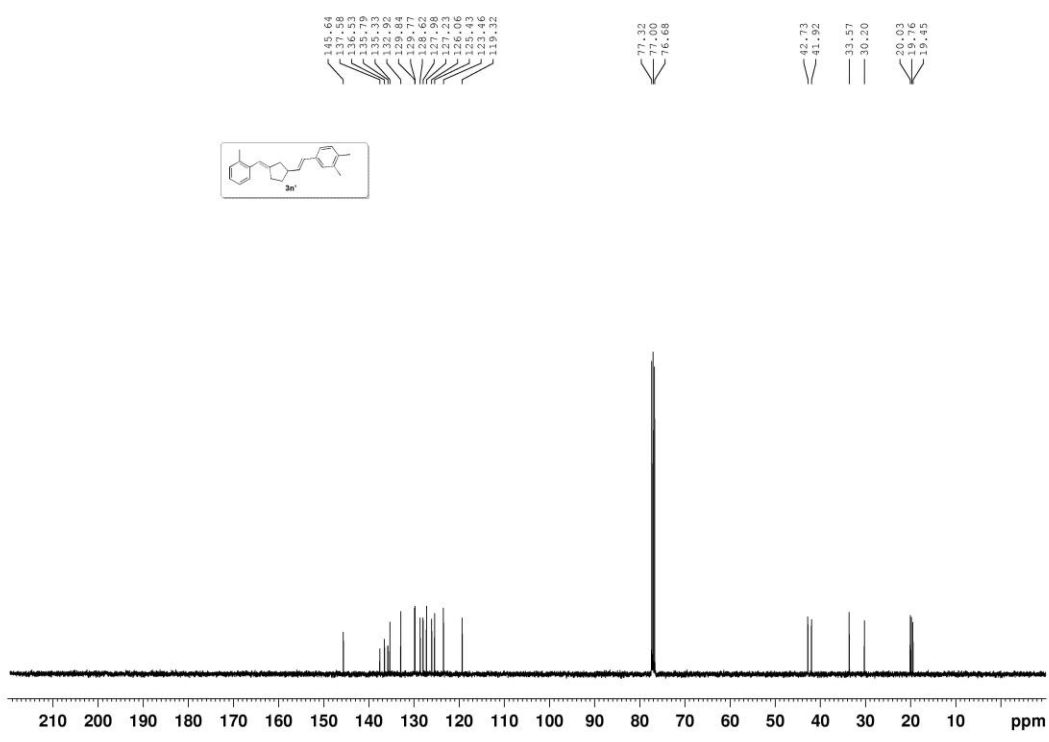

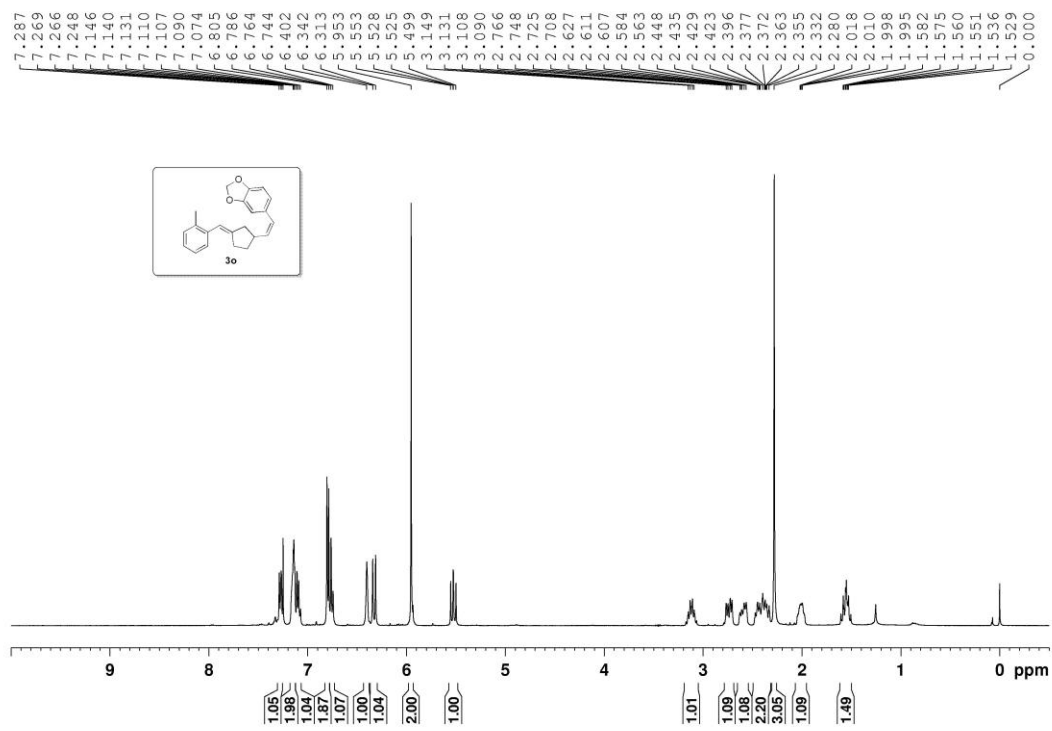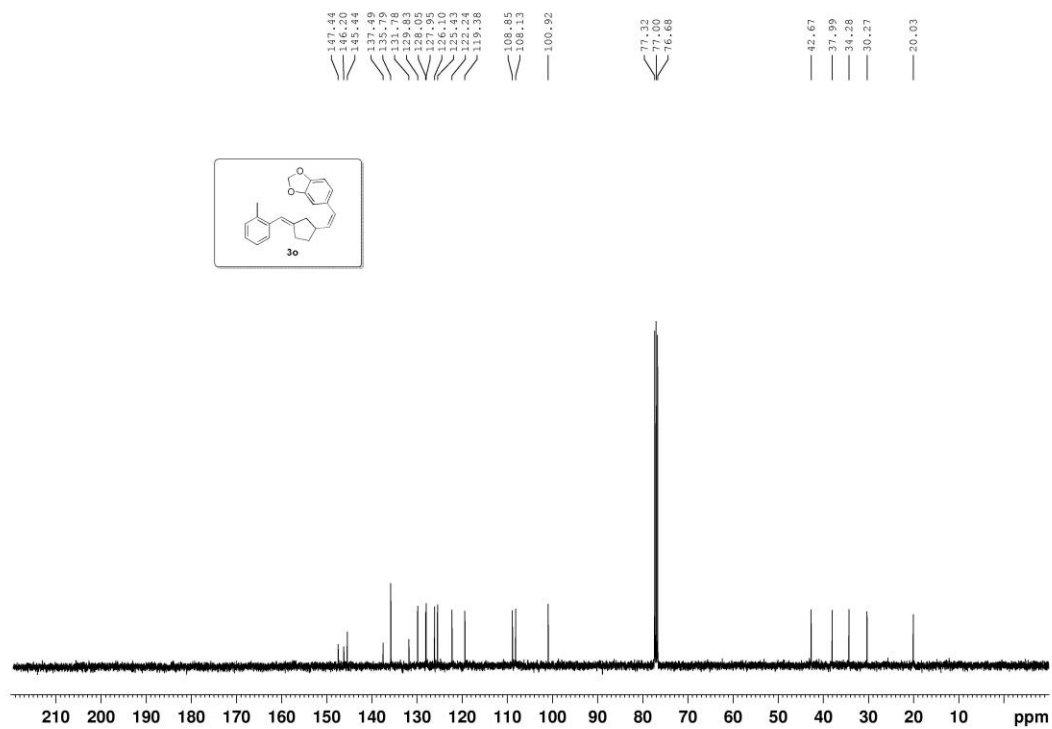

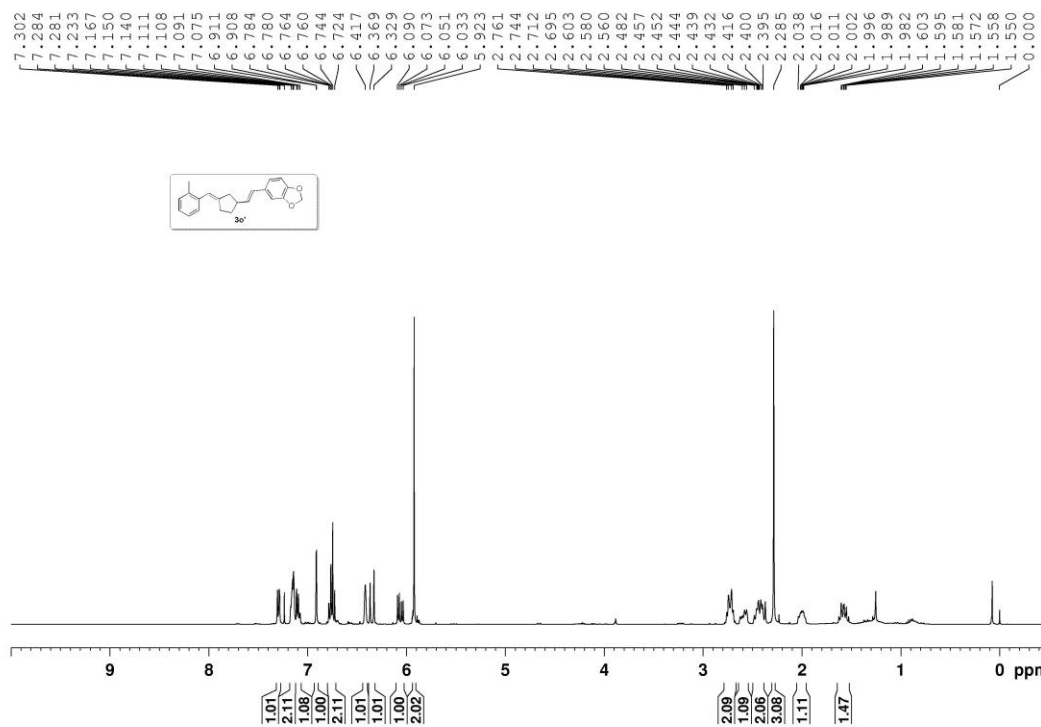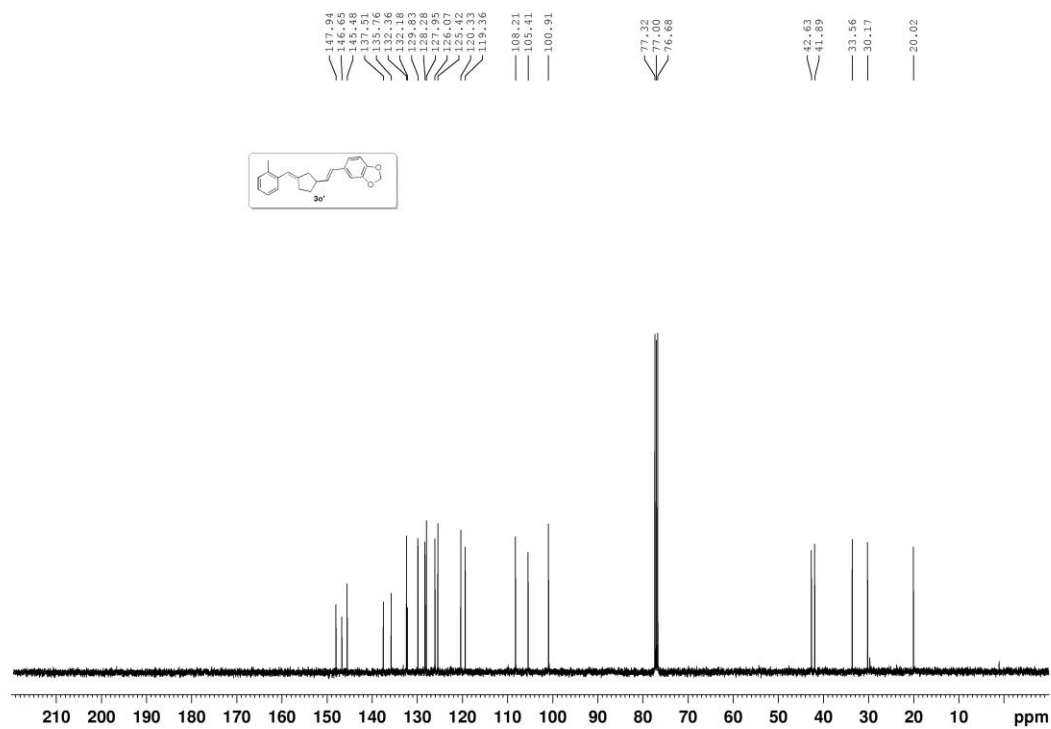

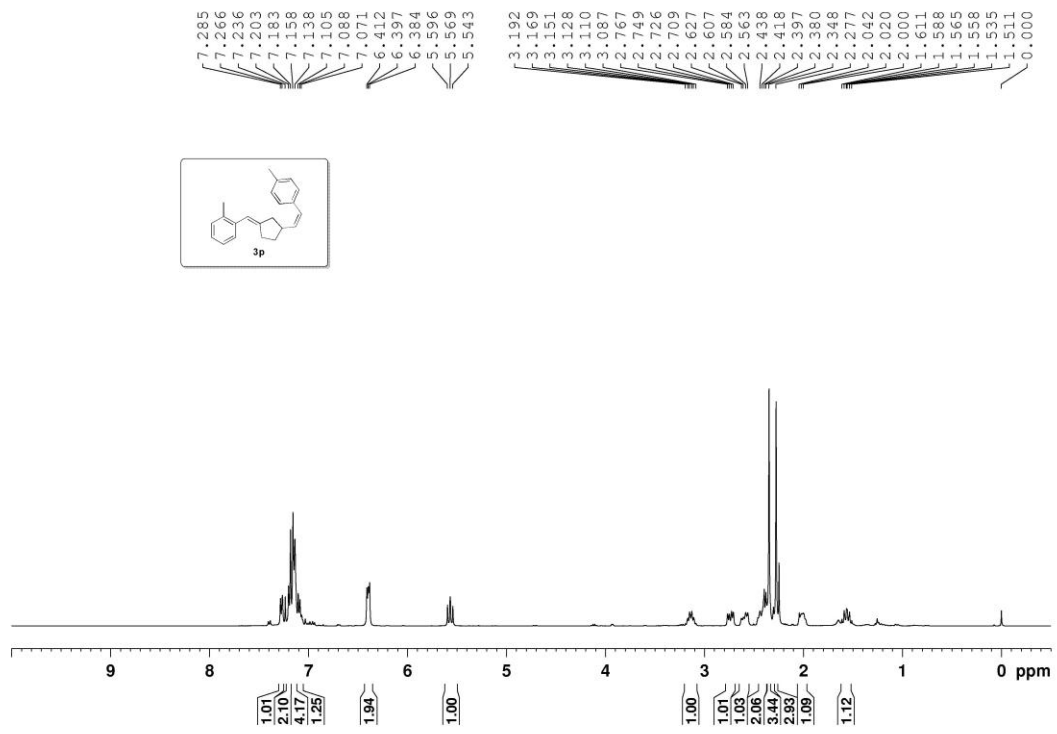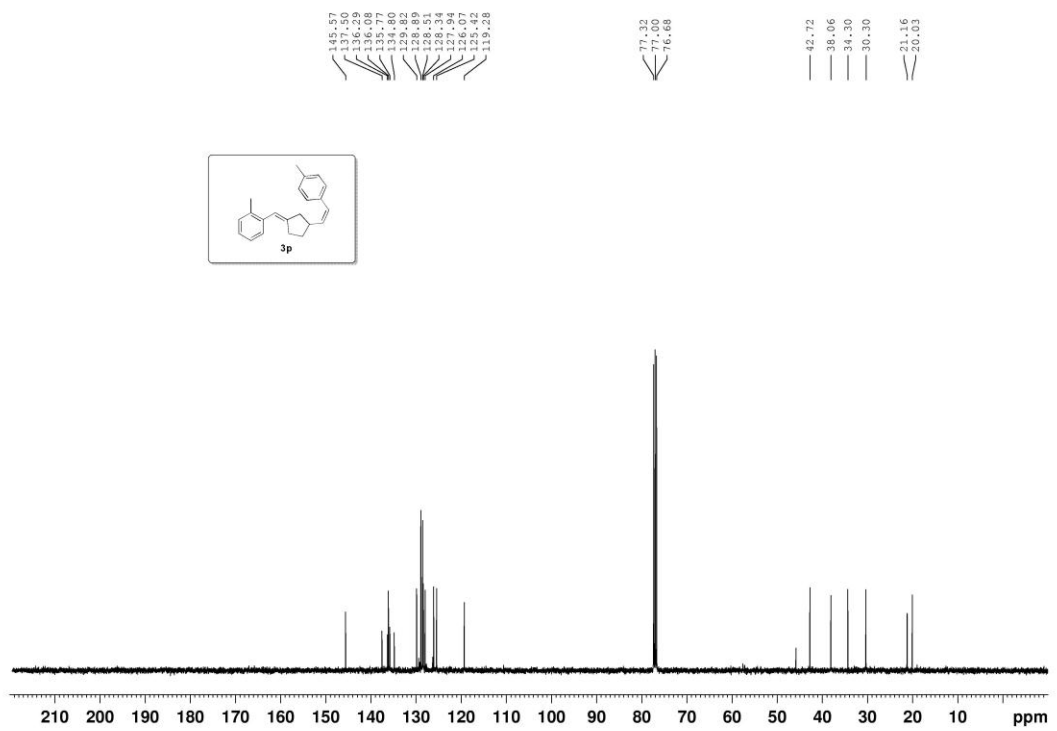

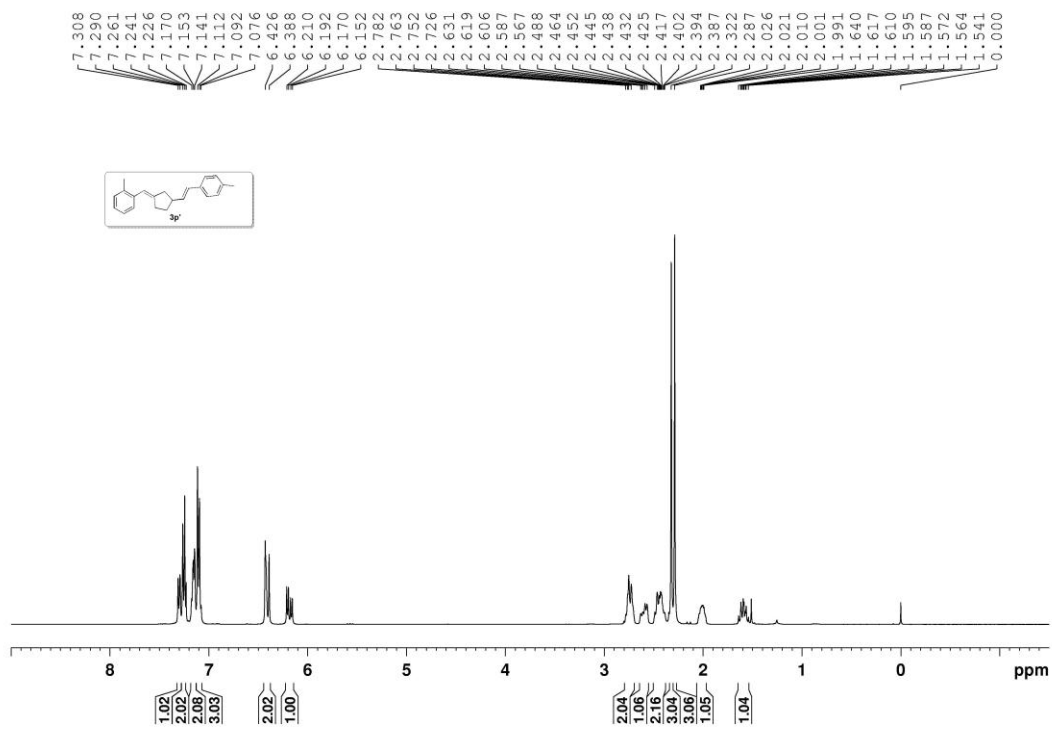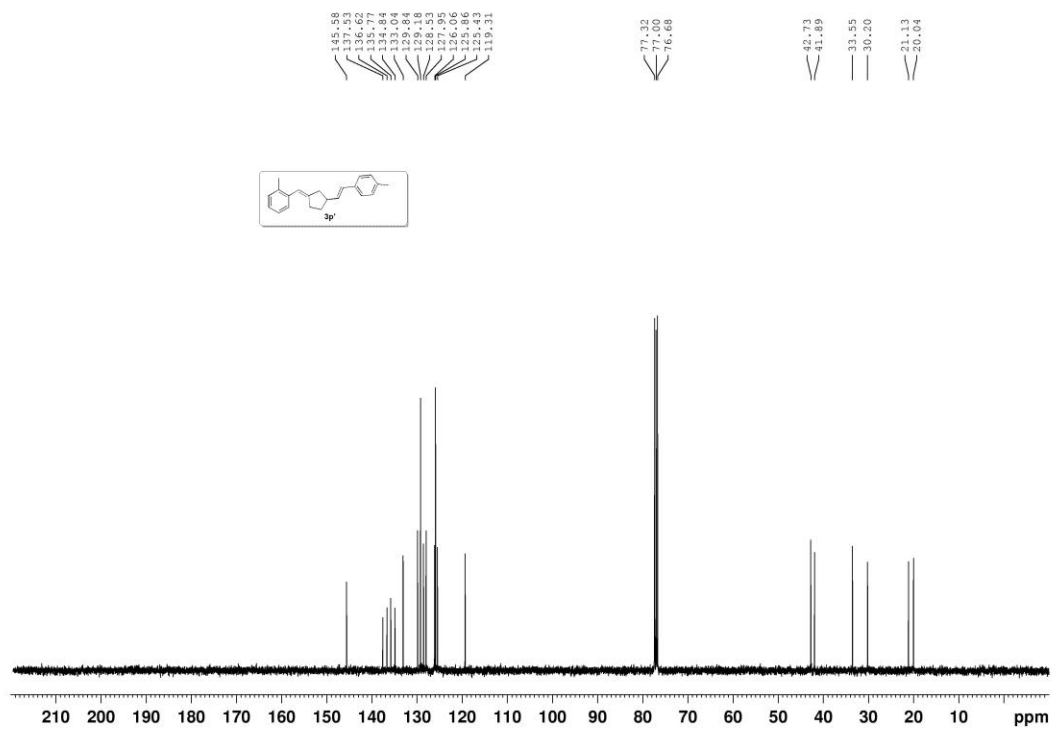



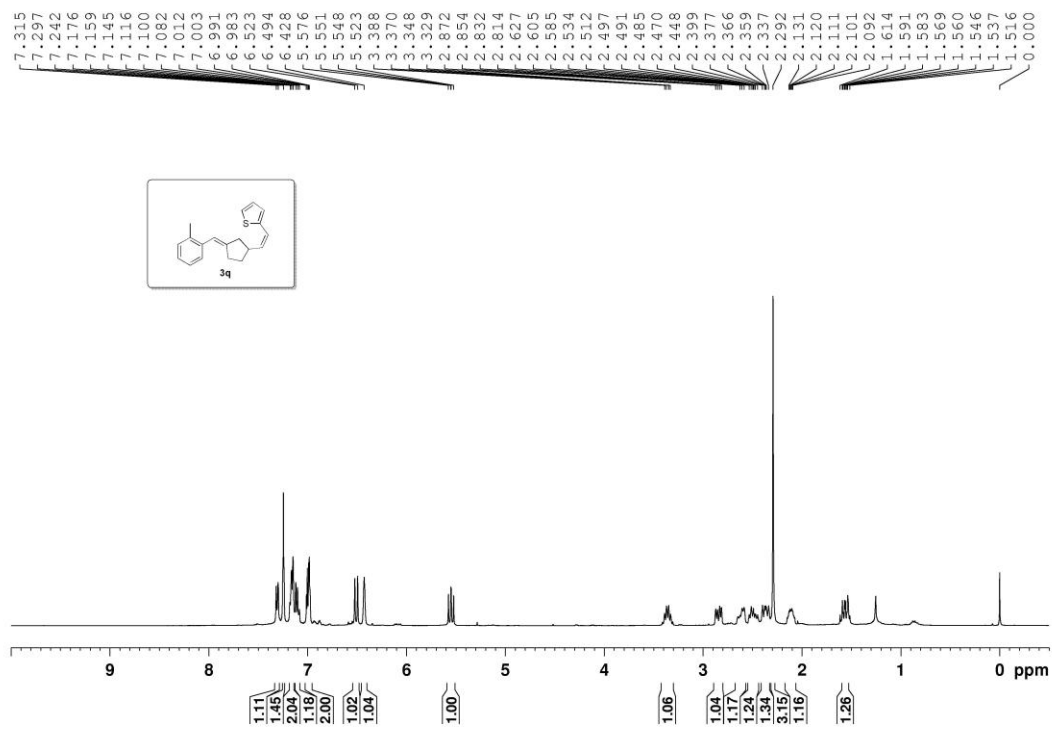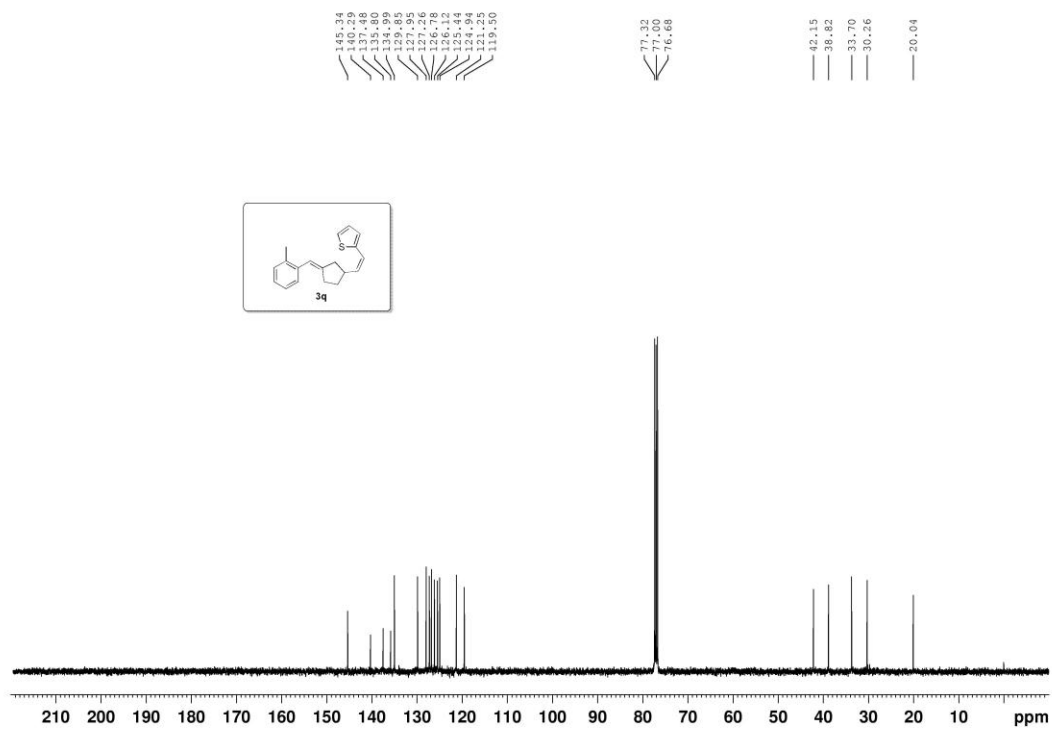

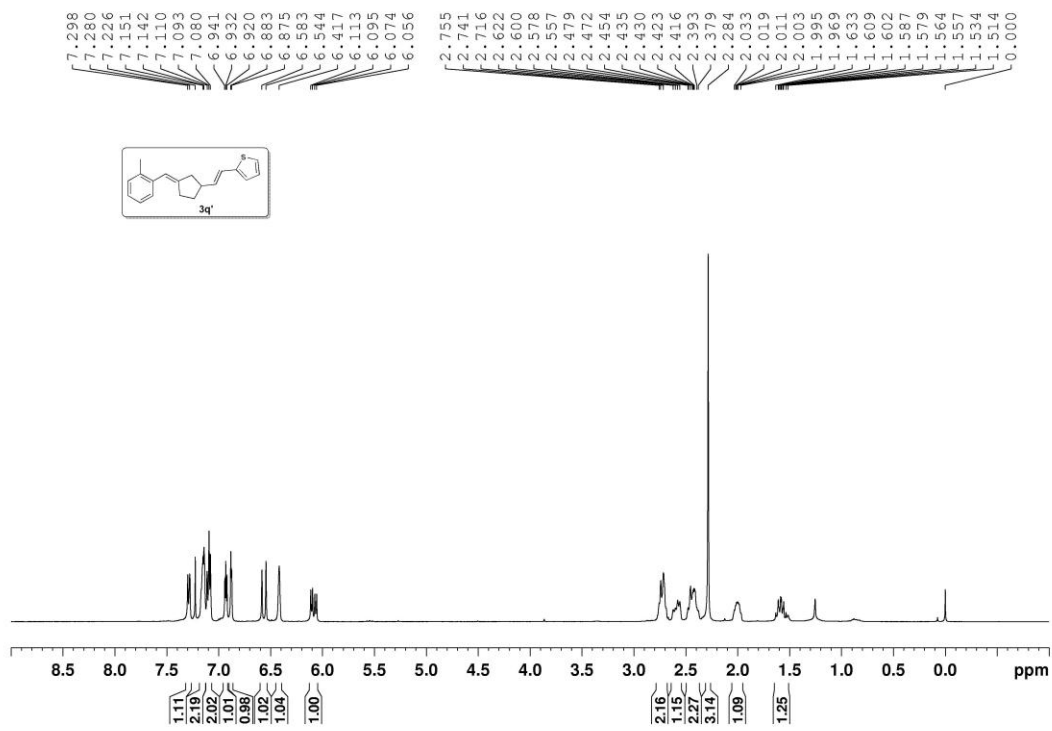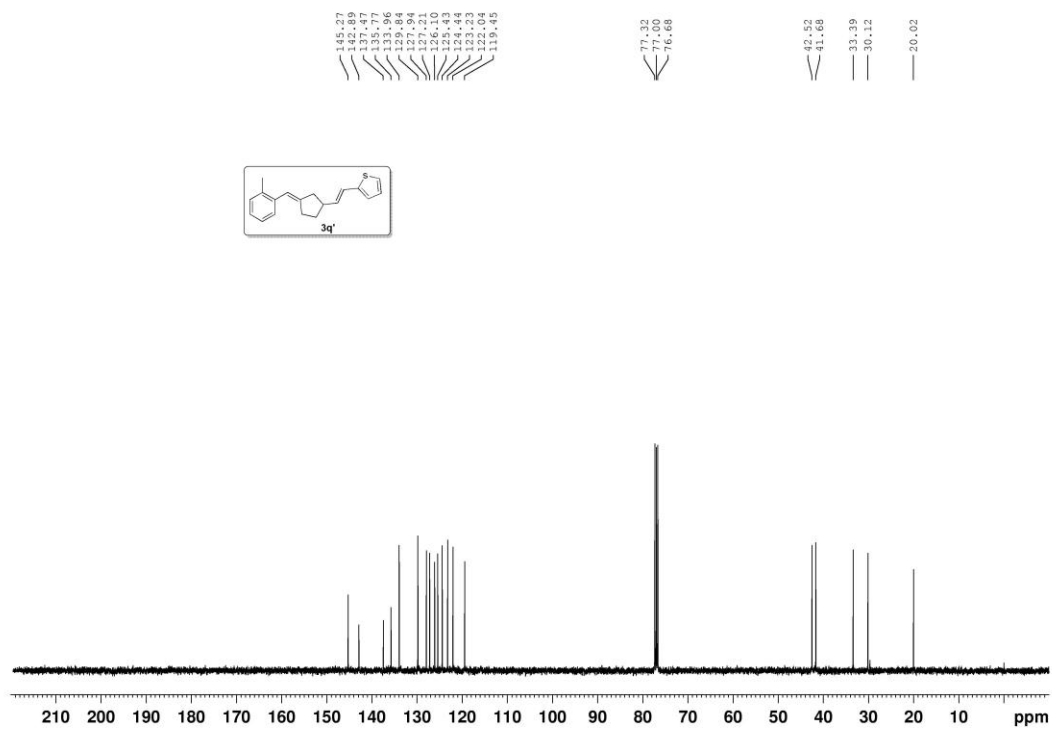

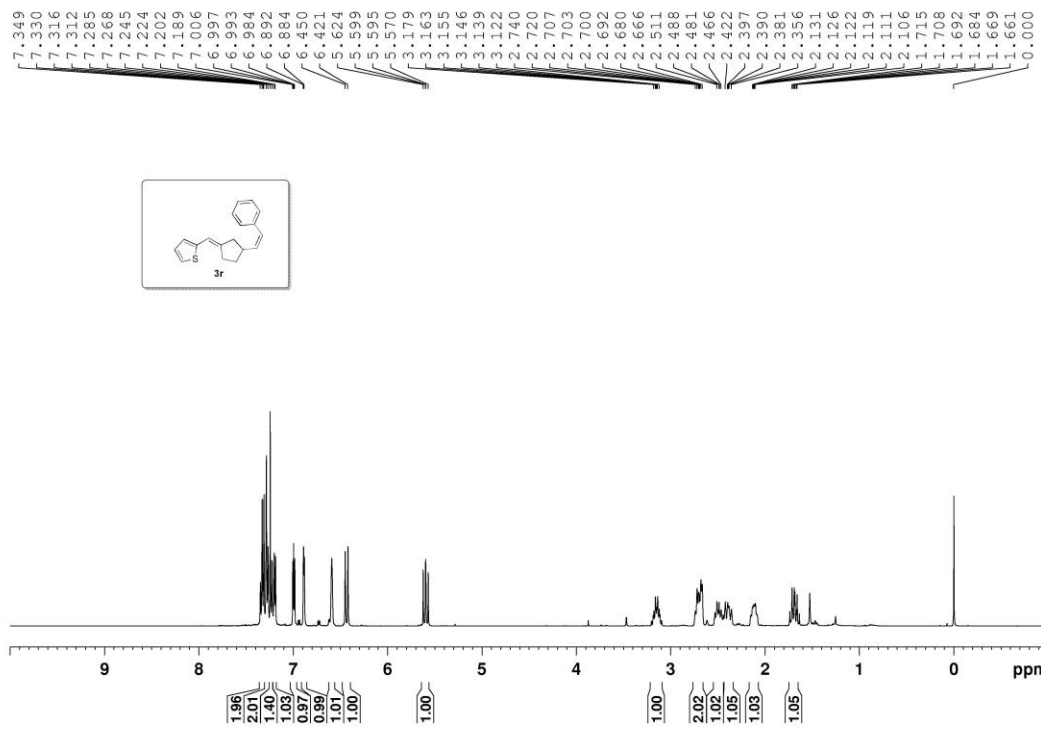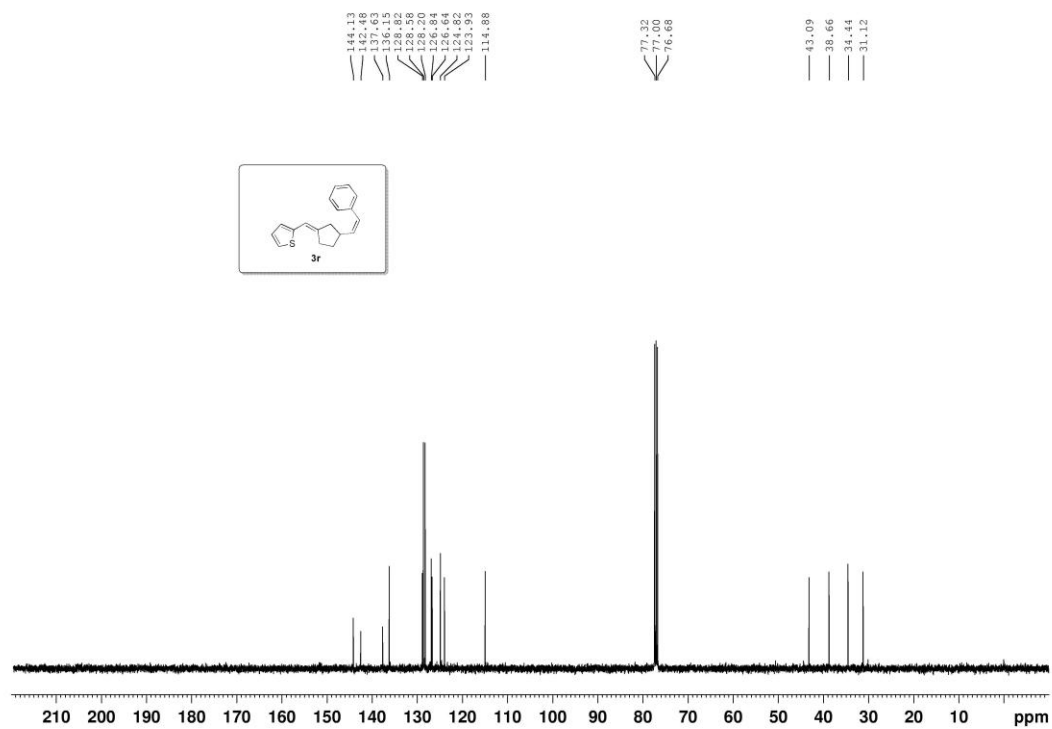

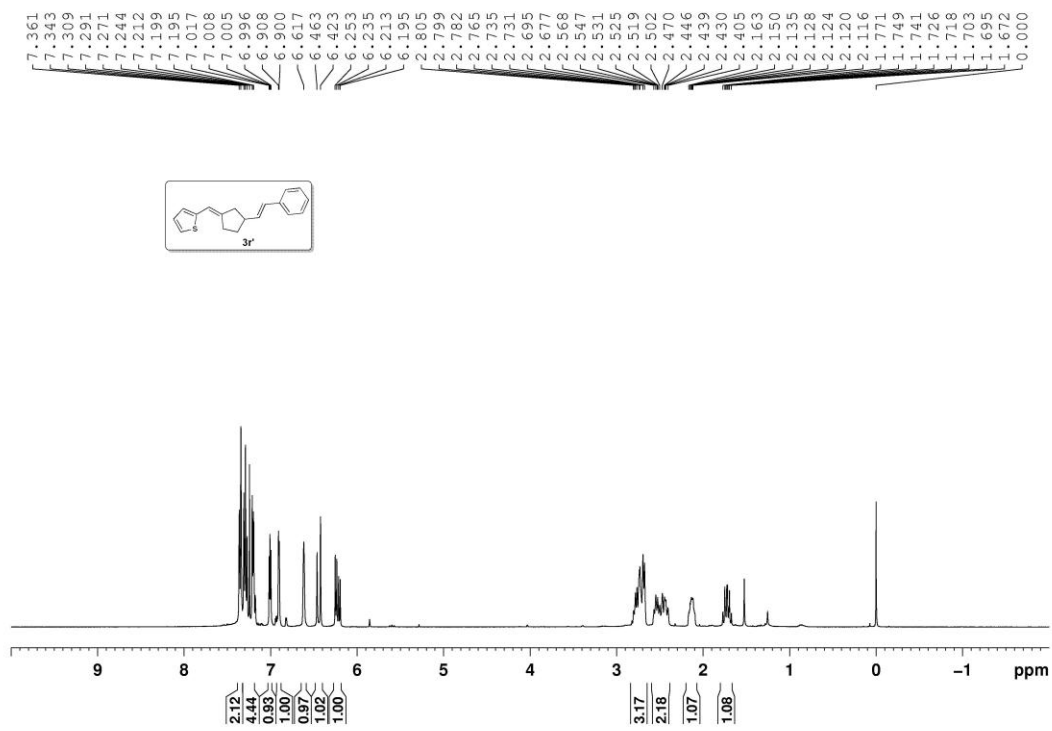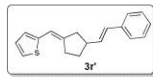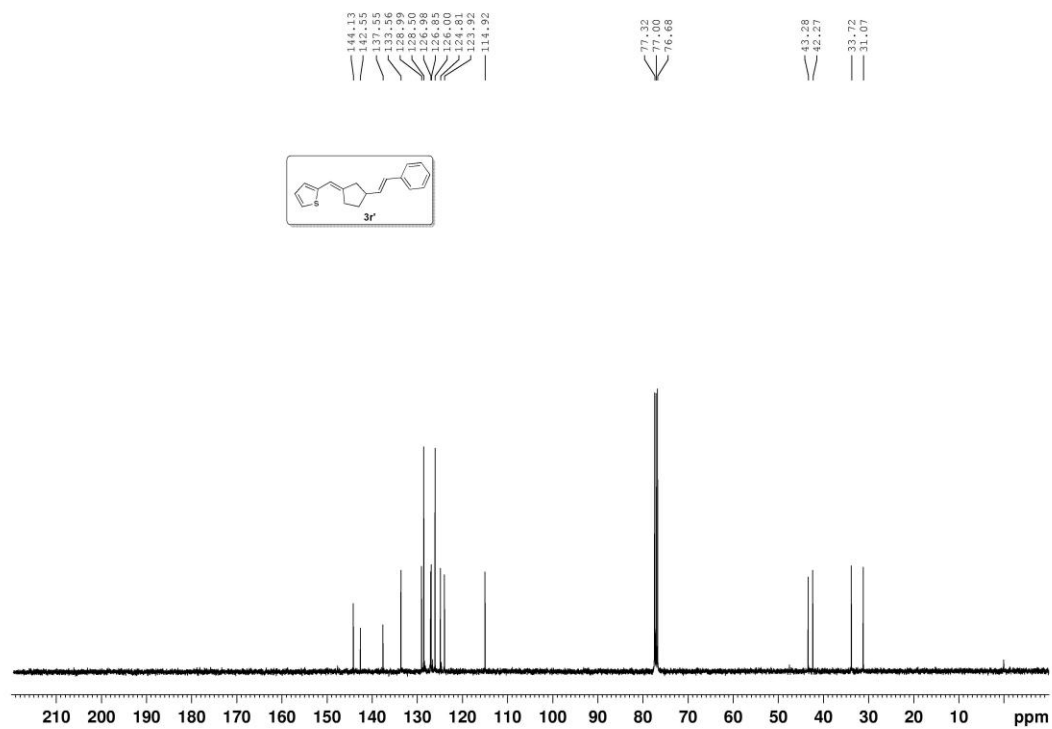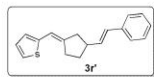

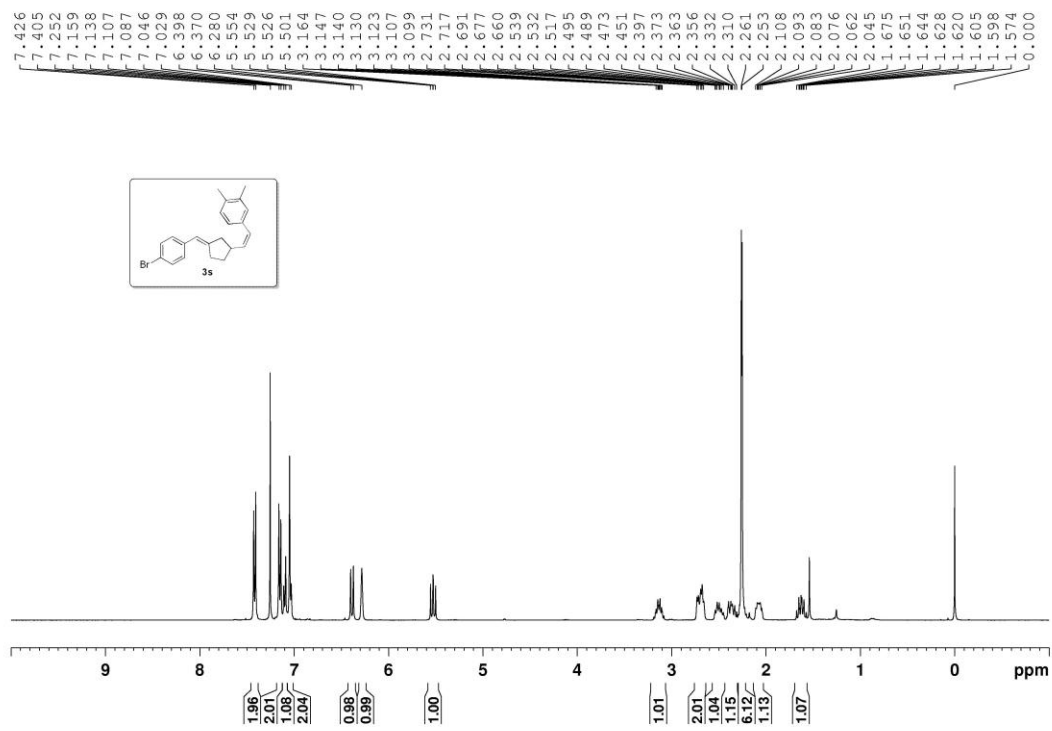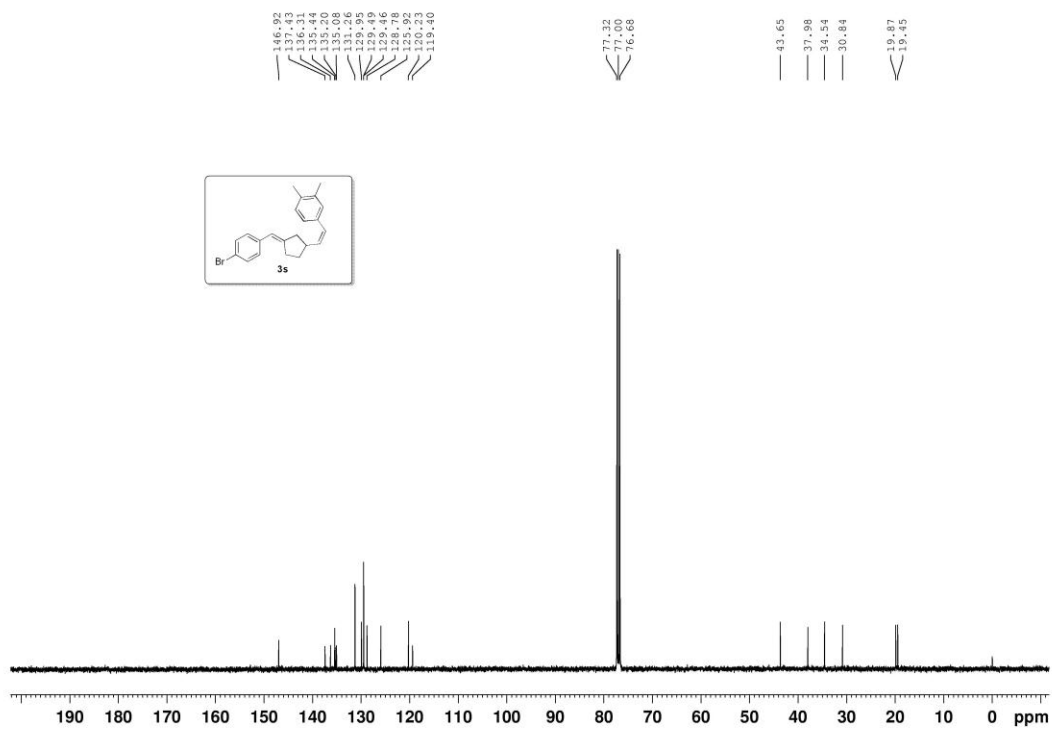

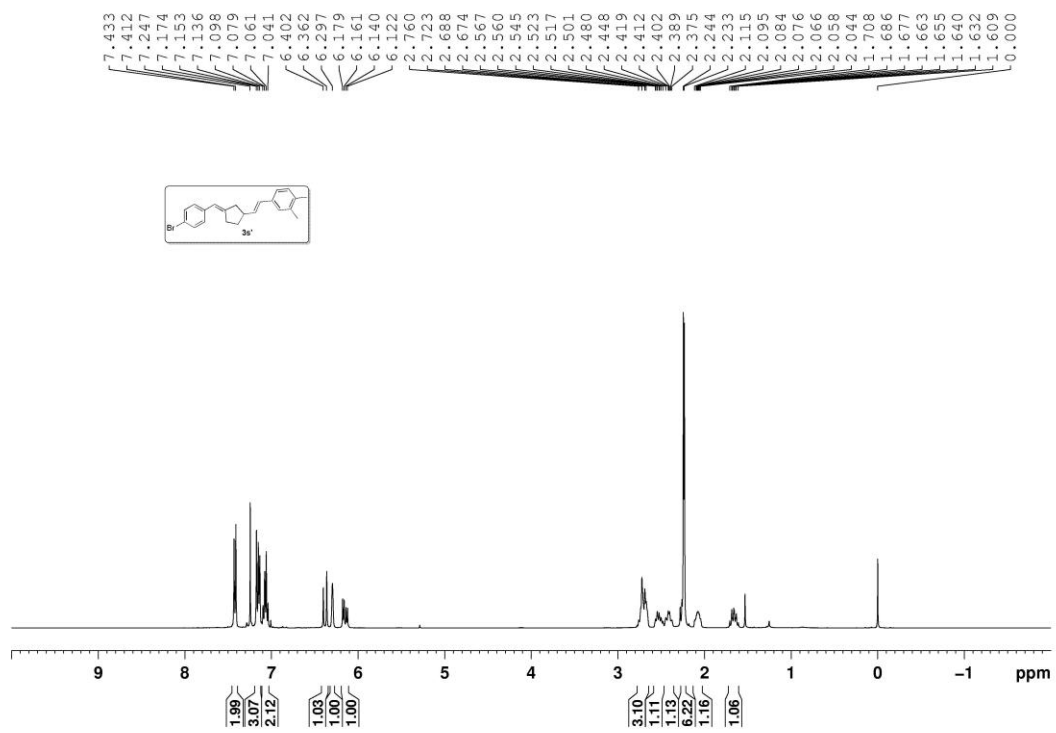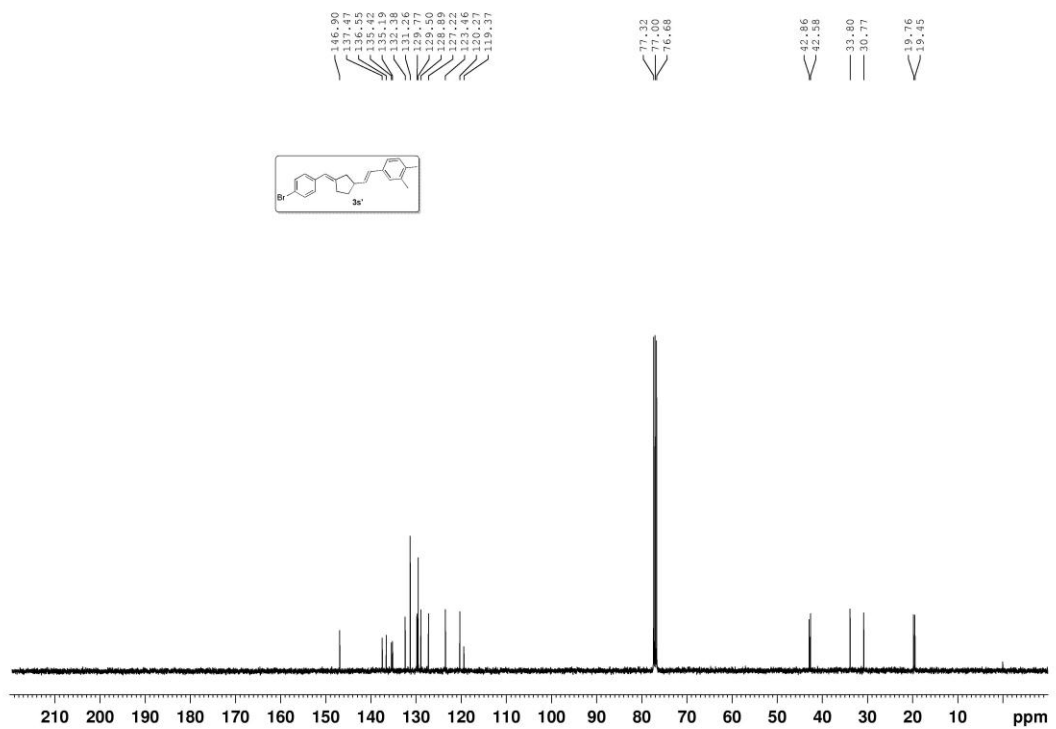

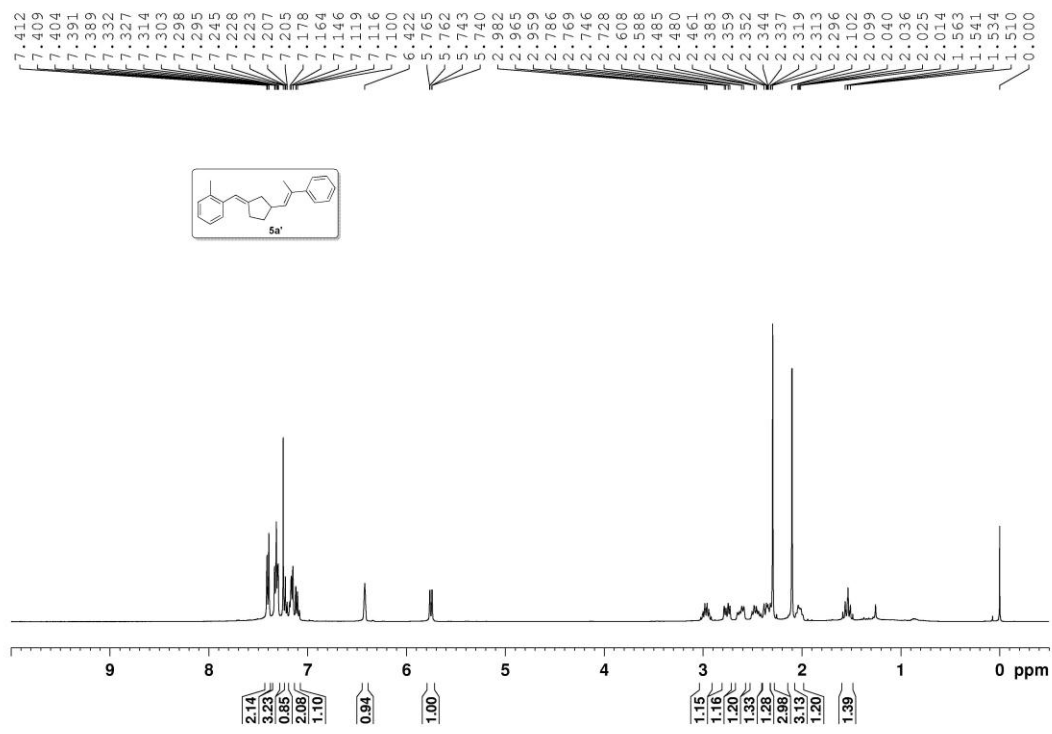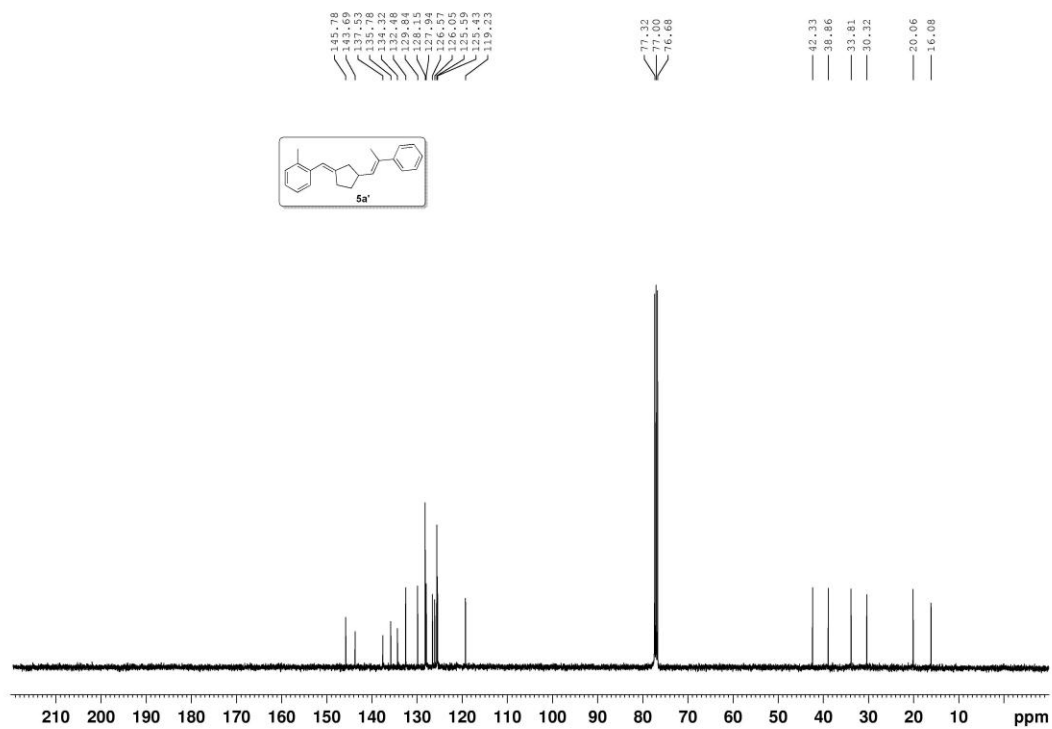

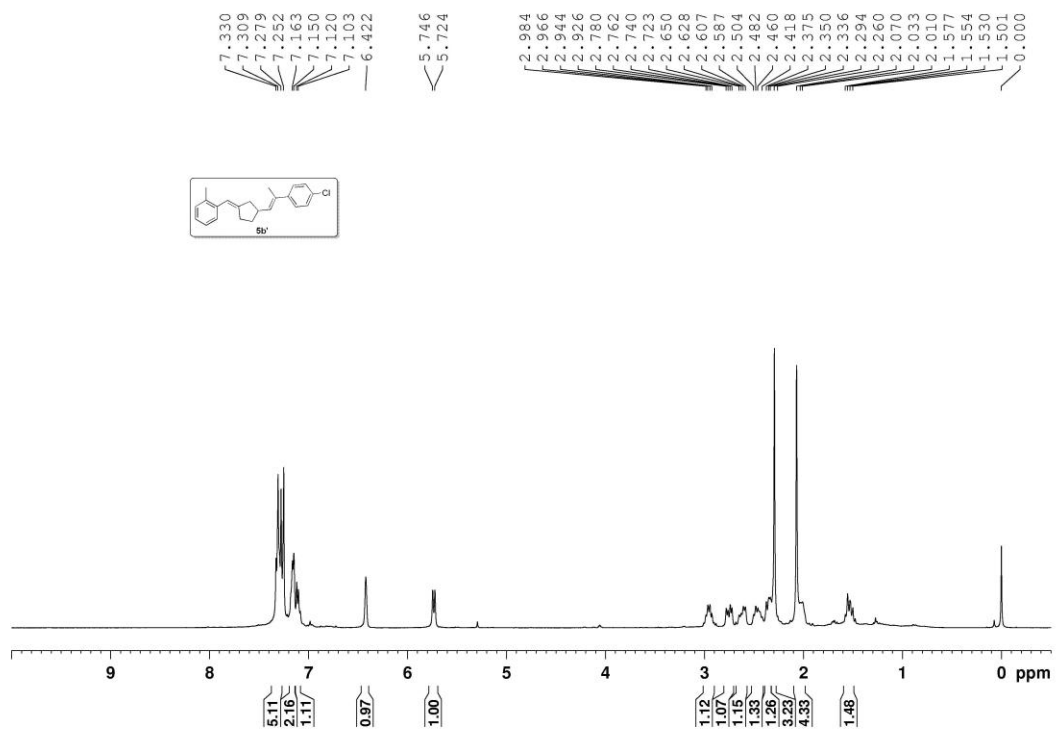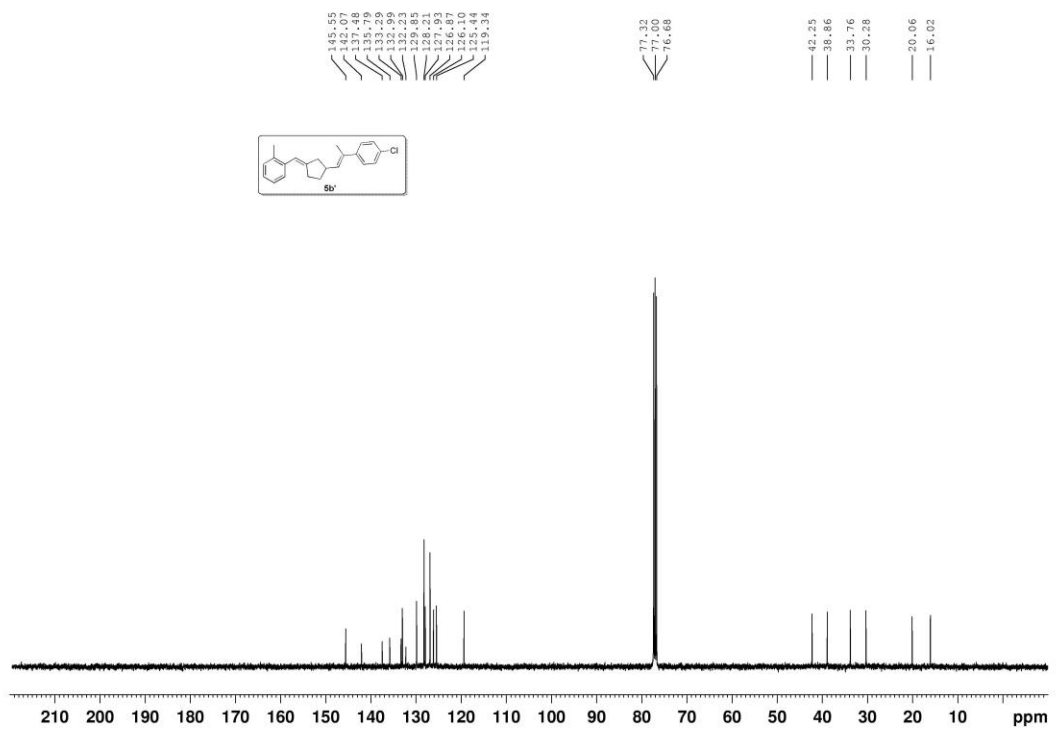



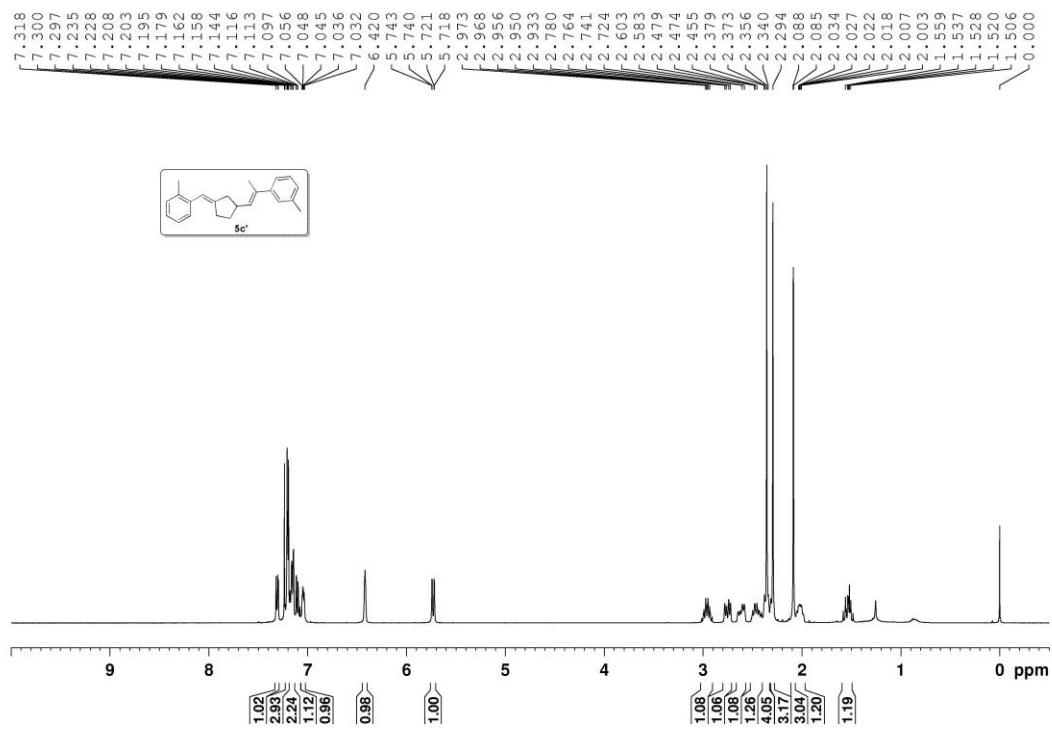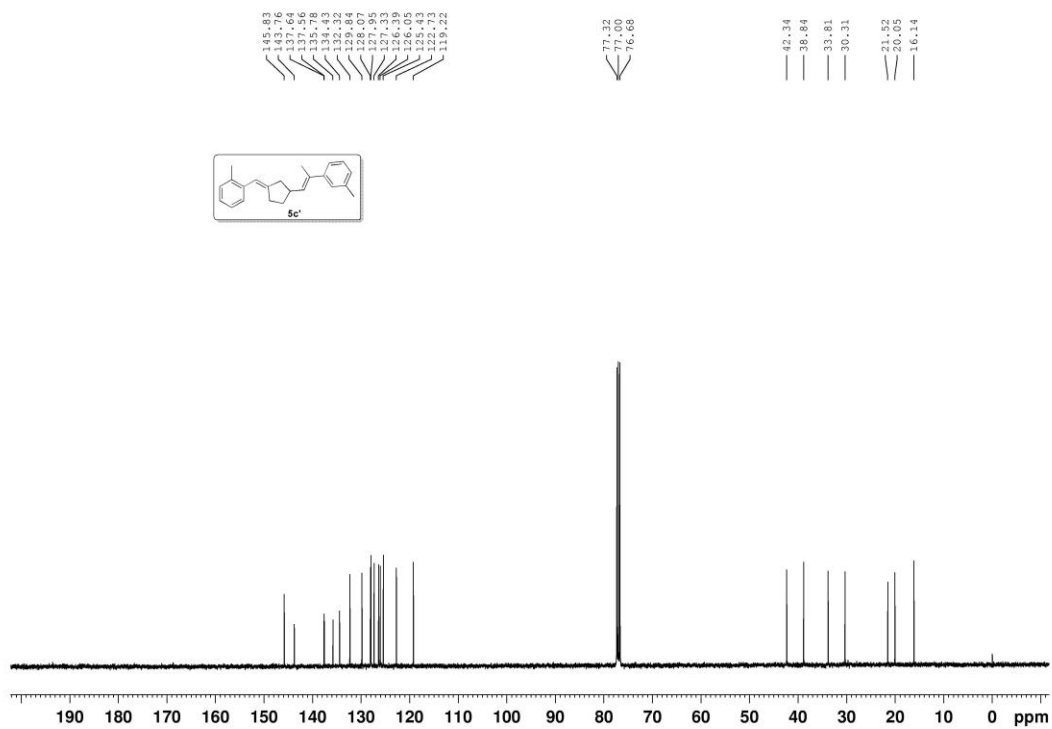

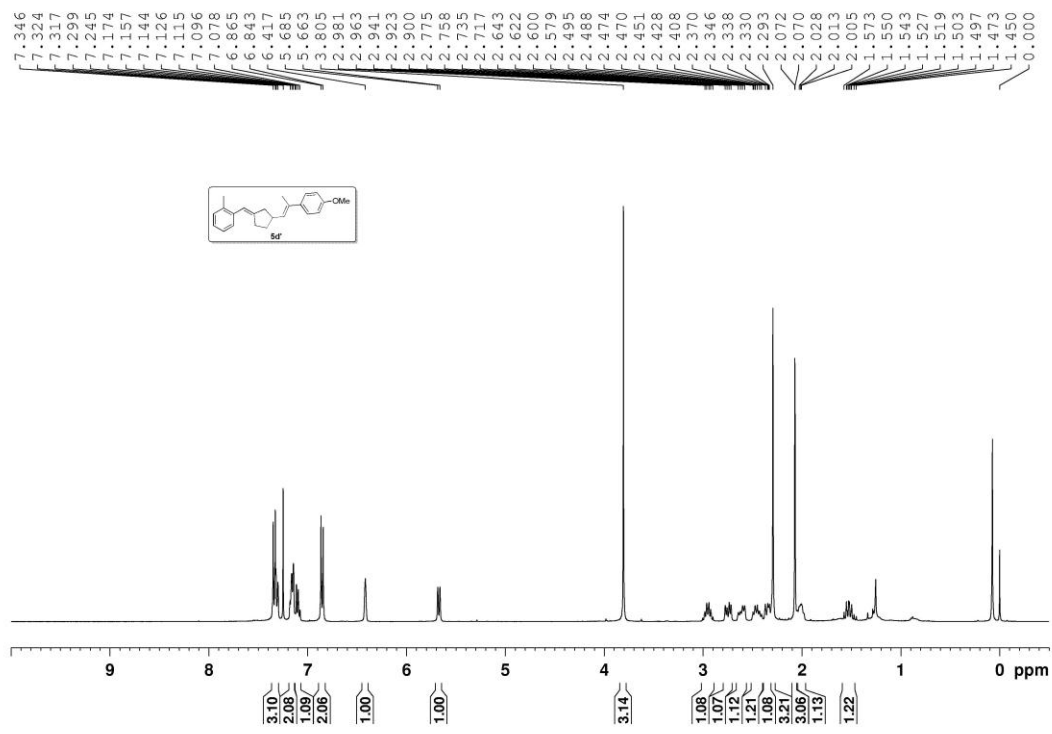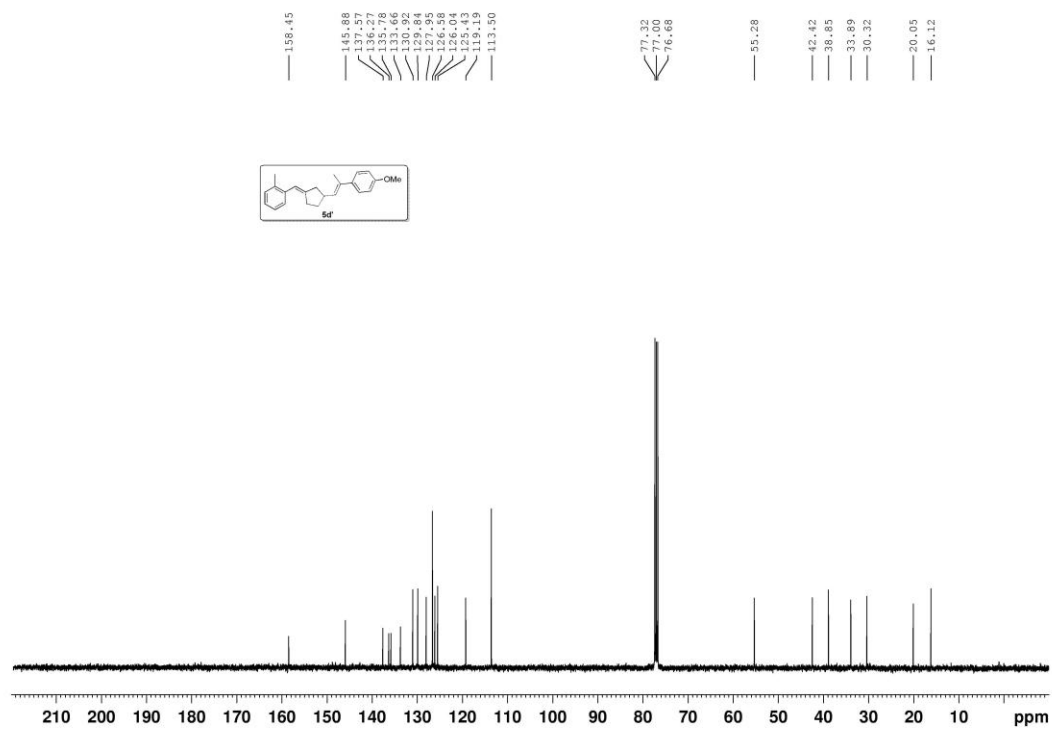

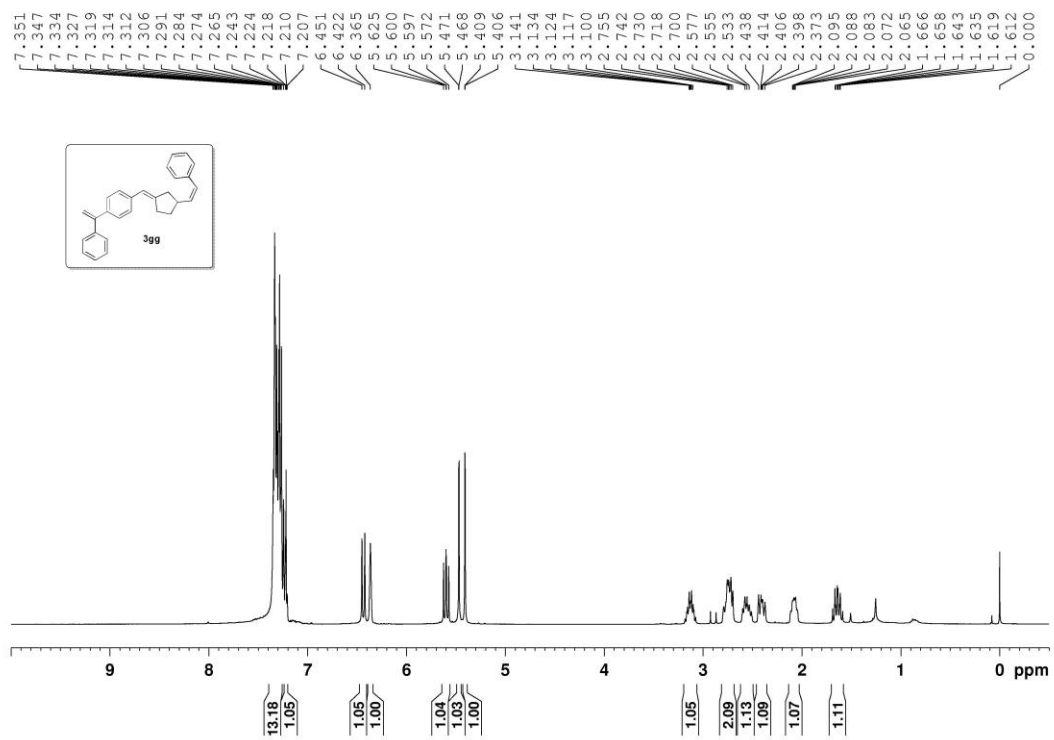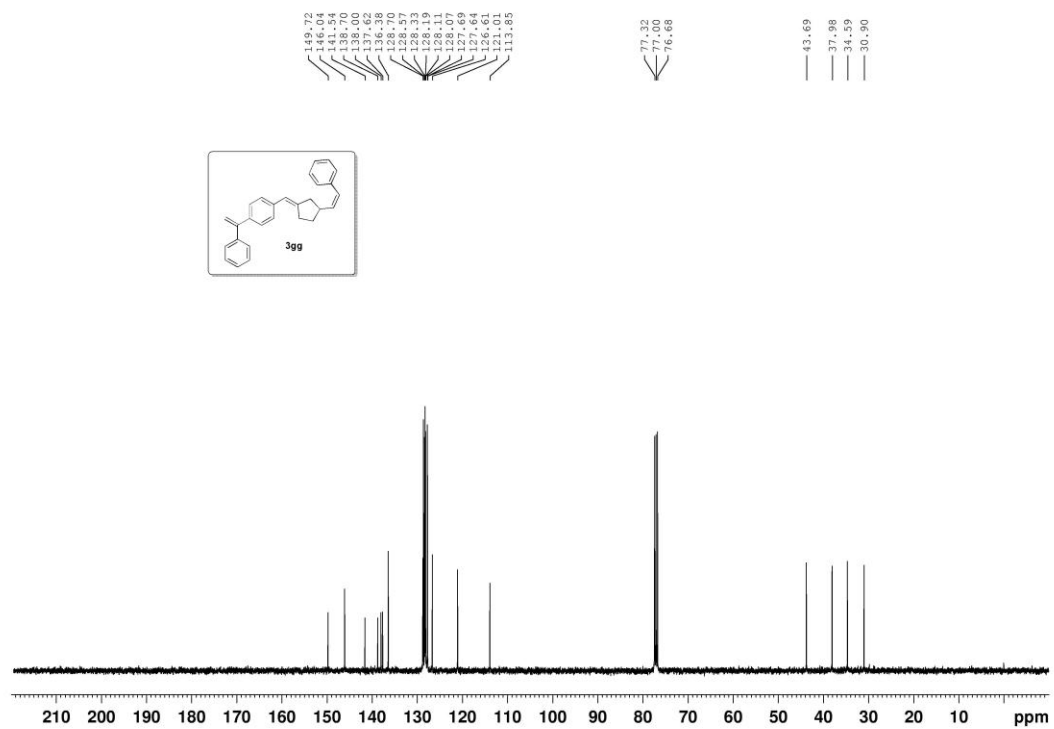

7.566  
7.348  
7.345  
7.335  
7.327  
7.319  
7.313  
7.305  
7.298  
7.292  
7.288  
7.273  
7.267  
7.230  
7.212  
7.194  
7.176  
6.565  
6.426  
6.388  
6.259  
6.241  
6.219  
6.201  
5.479  
5.477  
5.417  
5.414  
2.801  
2.784  
2.778  
2.754  
2.730  
2.640  
2.618  
2.603  
2.596  
2.590  
2.574  
2.494  
2.465  
2.457  
2.449  
2.420  
2.426  
2.097  
2.093  
2.083  
2.075  
2.063  
1.727  
1.705  
1.697  
1.682  
1.674  
1.659  
1.651  
0.000

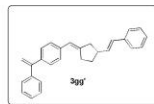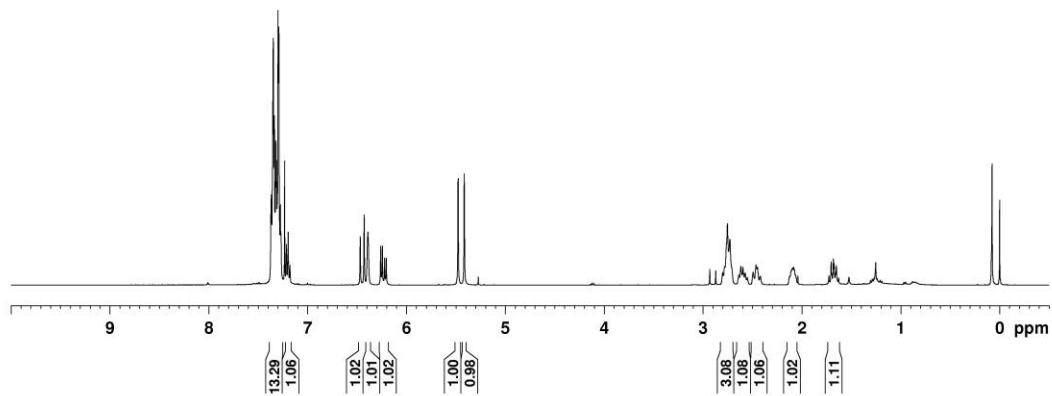

149.73  
141.54  
141.54  
138.69  
138.05  
133.76  
133.76  
128.88  
128.39  
128.39  
128.11  
128.09  
127.65  
126.95  
125.87  
125.87  
123.84  
113.88

77.32  
76.68  
76.68

42.87  
42.65  
33.84  
30.85

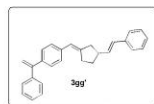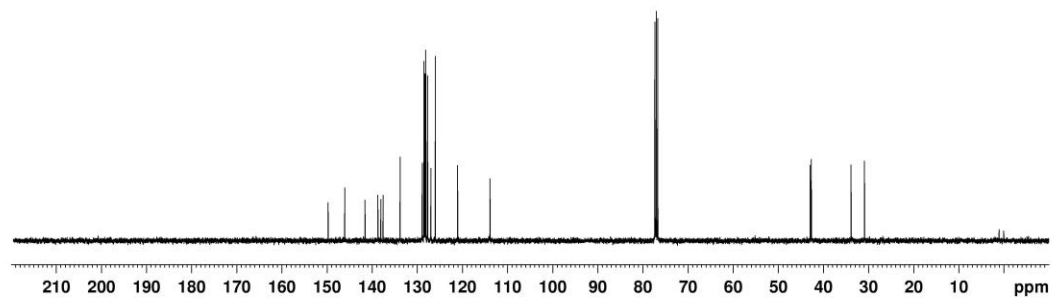

## 8. The NOE of 5d'

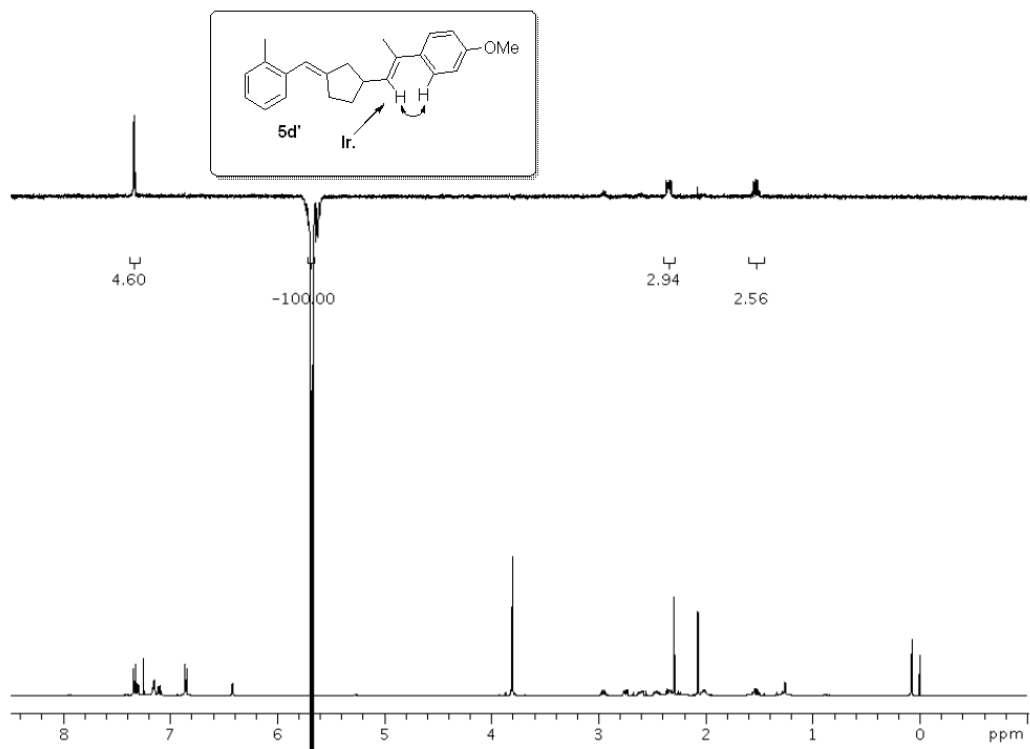

Supplement: c5cc02246k1.pdf [file c5cc02246k1.pdf]
